# Supplementary material for: Assessment of Global Trends in the Diagnosis of Mesothelioma From 1990 to 2017
Source: PubMed Central journal article supplement (PMC8358735; doi:10.1001/jamanetworkopen.2021.20360), 2021-08-11
Supplement: jamanetwopen-e2120360-s001.pdf [file jamanetwopen-e2120360-s001.pdf]

## Supplementary Online Content

Zhai Z, Ruan J, Zheng Y, et al. Assessment of global trends in the diagnosis of mesothelioma from 1990 to 2017. *JAMA Netw Open*. 2021;4(8):e2120360. doi:10.1001/jamanetworkopen.2021.20360

**eMethods.** GBD Overview, ASR Estimation, DALY Estimation, Joinpoint Regression Analysis, SDI Estimation, Definition and Estimation of UI, and Inclusion Criteria of Countries With Complete Asbestos Bans

**eTable 1.** Symbols and Asbestos Banning Times for 47 Countries Included in Study

**eTable 2.** Deaths and Age-Standardized Death Rates for Mesothelioma Among Regions in 1990 and 2017 and Temporal Trends From 1990 to 2017

**eTable 3.** DALYs and Age-Standardized DALY Rates for Mesothelioma Among Regions in 1990 and 2017 and Temporal Trends From 1990 to 2017

**eTable 4.** Countries With the Highest and Lowest ASRs or Temporal Trends Using Different Measures

**eTable 5.** Incident Cases of Mesothelioma Among Countries and Territories in 1990 and 2017 and Temporal Trends From 1990 to 2017

**eTable 6.** Deaths and Age-Standardized Death Rates for Mesothelioma Among Countries and Territories in 1990 and 2017 and Temporal Trends From 1990 to 2017

**eTable 7.** DALYs and Age-Standardized DALY Rates for Mesothelioma Among Countries and Territories in 1990 and 2017 and Temporal Trends From 1990 to 2017

**eFigure 1.** Mesothelioma Cases With Age Composition by SDI Region From 1990 to 2017

**eFigure 2.** Age-Standardized Incidence Rates for Mesothelioma per 100 000 People in 21 Geographic Regions by SDI in 2017

**eFigure 3.** Age-Standardized Death Rates for Mesothelioma per 100 000 People in 21 Geographic Regions by SDI in 2017

**eFigure 4.** Proportion of Age Subgroups of Incident Cases by Region and Year in 1990 and 2017

**eFigure 5.** Proportion of Age Subgroups of Incident Cases by Year Among Female and Male Patients

**eFigure 6.** Mesothelioma Cases With Age Composition Among Female Patients by SDI Region From 1990 to 2017

**eFigure 7.** Mesothelioma Cases With Age Composition Among Men by SDI Region From 1990 to 2017

**eFigure 8.** Comparison of Incidence Rates With Age Composition Between Female and Male Patients

**eFigure 9.** Comparison of Death Rates With Age Composition Between Female and Male Patients

**eFigure 10.** Comparison of DALY Rates With Age Composition Between Female and Male Patients

**eFigure 11.** Temporal Trends of Age-Standardized Incidence Rates (ASIRs) for Mesothelioma per 100 000 People in 47 Countries With Complete Asbestos Bans

**eFigure 12.** Comparison Between Deaths in 1990 vs 2017 With Age Composition at Regional Level

**eFigure 13.** Comparison Between DALYs in 1990 vs 2017 With Age Composition at Regional Level

**eFigure 14.** Proportion of Deaths in Age Subgroups by Region and Year

**eFigure 15.** Age-Standardized DALY Rates for Mesothelioma per 100 000 People in 21 Geographic Regions by SDI in 2017

**eFigure 16.** Temporal Trends of Age-Standardized Incidence, Death, and DALY Rates for Mesothelioma by SDI Level Among Female and Male Patients

**eFigure 17.** Joinpoint Regression Analysis of Age-Standardized Incidence Rates (ASIRs) Among Female Patients in SDI Regions From 1990 to 2017

**eFigure 18.** Joinpoint Regression Analysis of Age-Standardized Incidence Rates (ASIRs) Among Male Patients in SDI Regions From 1990 to 2017

**eFigure 19.** Joinpoint Regression Analysis of Age-Standardized Incidence Rates (ASIRs) in SDI Regions From 1990 to 2017

**eFigure 20.** Joinpoint Regression Analysis of Age-Standardized Death Rates (ASDRs) in SDI Regions From 1990 to 2017

**eFigure 21.** Epidemiological Patterns of Mesothelioma Deaths in 195 Countries and Territories

**eFigure 22.** Epidemiological Patterns of Mesothelioma DALYs in 195 Countries and Territories

**eFigure 23.** Epidemiological Patterns Among Male Patients in 195 Countries and Territories

**eFigure 24.** Epidemiological Patterns Among Female Patients in 195 Countries and Territories

## **eReferences**

This supplementary material has been provided by the authors to give readers additional information about their work.

**eMethods.** GBD Overview, ASR Estimation, DALY Estimation, Joinpoint Regression Analysis, SDI Estimation, Definition and Estimation of UI, and Inclusion Criteria of Countries With Complete Asbestos Bans

## **GBD Overview**

The Global Burden of Disease (GBD) is an approach to global descriptive epidemiology. It is a systematic, scientific effort to quantify the comparative magnitude of health loss due to diseases, injuries, and risk factors by age, sex, and geographies for specific points in time.

IHME serves as the coordinating center for the GBD and affiliated projects.

GBD produces regular estimates of all-cause mortality, deaths by cause, years of life lost due to premature mortality (YLLs), years lived with disability (YLDs), and disability-adjusted life years (DALYs) for a cause list. The cause list is agreed upon annually by the Scientific Council. The critical milestones for ongoing estimation include regular updates to the GBD estimates, referred to as the “GBD round.” For each round, the entire time series back to 1990 is re-estimated using all available data to ensure the most complete and highly comparable set of estimates possible. Previous results will be archived every time new results are released. The GBD provides cutting-edge and timely results through scientific papers, policy reports, web content, and interactive visualizations.

Published in November 2018, GBD 2017 provides for the first time an independent estimation of population, for each of 195 countries and territories and the globe, using a standardized, replicable approach, as well as a comprehensive update on fertility. GBD 2017 incorporates major data additions and improvements, and methodological refinements.

Mortality and life expectancy estimates have been extended back to 1950, and new causes have been added to the fatal and non-fatal cause lists, for a total of 359 diseases and injuries

(<http://www.healthdata.org/gbd/about/protocol>).

### **ASR Estimation**

Age-standardized rate was determined to compare the age structure of different groups or the age structure in the same population with changes over time, considered as the objective index to quantify the incidence trends of cancer.

The computational method of the ASR (per 100,000 population) was calculated by the sum of the products of age-specific rates ( $a_i$ , where  $i$  is the  $i^{\text{th}}$  age) and the number of population (or weight) ( $w_i$ ) in the same age group of  $i$  in the population which was selected as reference standard population, and then, divide by the sum of the standard population weights, ie (1).

$$ASR = \frac{\sum_{i=1}^A a_i w_i}{\sum_{i=1}^A w_i} \times 100,000$$

### **DALY Estimation**

Disability adjusted life-years were also defined as years of healthy life lost, estimated by the sum of the YLLs and the YLDs. YLLs, the years of life lost due to premature mortality, are the multiplication of deaths and a standard life expectancy at each age of death. In each population greater than 5 million, the standard life expectancy was estimated from a life table which includes the lowest observed mortality at each age group (2). YLDs were defined as the years lived with any short-term or long-term health loss weighted for severity by the disability weights, calculated by multiplying prevalence estimate and the disability weight of each mutually exclusive sequela for prostate cancer, such as disability due to incontinence and impotence from prostatectomy (3).

### **Joinpoint Regression Analysis**

The joinpoint regression model, which is composed of a few continuous linear phases, is often useful to describe changes in trend data. Joinpoints are the best-fitting point where a statistically significant change occurred, identified with the Joinpoint Regression Program (version 4.7.0.0). The optimum number of joinpoints will be recommended by the program, which ranged from 0 to 5. Annual percentage change (APC) between successive joinpoints were measured to reflect the temporal trends of incidence and mortality rates. The Monte Carlo permutation method was used to test significant difference, and two-sided  $P$  values less than 0.05 were considered to indicate statistical significance (4).

### **SDI Estimation**

Socio-demographic index is a compound measure of income, average years of schooling and fertility for each GBD location and year which is used as a measure of socio-demographic development.

Developed by GBD researchers and used to help produce these estimates, SDI is a composite indicator of development status strongly correlated with health outcomes. It is the geometric mean of 0 to 1 indices of total fertility rate under the age of 25 (TFU25), mean education for those ages 15 and older (EDU15+), and lag distributed income (LDI) per capita. As a composite, a location with an SDI of 0 would have a theoretical minimum level of development relevant to health, while a location with an SDI of 1 would have a theoretical maximum level (5).

### **Definition and Estimation of UI**

Uncertainty intervals are a range of values that reflects the certainty of an estimate. In GBD, every estimate is calculated 1,000 times, each time sampling from distributions rather

than point estimates for data inputs, data transformations and model choice. The 95th uncertainty interval is determined by the 25th and 975th value of the 1,000 values after ordering them from smallest to largest. Larger uncertainty intervals can result from limited data availability, small studies, and conflicting data, while smaller uncertainty intervals can result from extensive data availability, large studies, and data that are consistent across sources (<http://ghdx.healthdata.org/gbd-2017>).

### **Inclusion criteria of the countries with complete asbestos bans**

The chronology of asbestos bans and restrictions were extracted from the International Ban Asbestos Secretariat (<http://www.ibasecretariat.org/index.htm>), to explore the temporal trend of mesothelioma incidence after complete asbestos bans (including chrysotile). There were 67 countries and territories recorded in the list of current asbestos bans. However, compliance with this directive has not been verified in Cyprus, Czech Republic, Greece, Hungary, Lithuania, Malta, Portugal, and Slovakia, which were excluded from this analysis. In addition, Croatia, Djibouti, Gabon, New Zealand, Qatar, Seychelles, Slovenia, Taiwan (China), and Uruguay, were excluded from our list for lack of specific schedule or even enforcement of the complete bans. Gibraltar, Liechtenstein, Monaco, New Caledonia were not enrolled in the GBD database and incapable of analyzing. Nepal were added into our list, which enforced a ban on the import, sale, distribution and use of all asbestos in 2015 and was not recorded in the current bans list. The 47 countries finally included in our analysis were listed below.

**eTable 1.** Symbols and Asbestos Banning Times for 47 Countries Included in Study

| Countries | Symbol | Time for complete bans (year) | Countries      | Symbol | Time for complete bans (year) |
|-----------|--------|-------------------------------|----------------|--------|-------------------------------|
| Algeria   | ●      | 2009                          | Japan          | ●      | 2012                          |
| Argentina | ▲      | 2001                          | Jordan         | ▲      | 2006                          |
| Australia | ■      | 2002                          | Kuwait         | ■      | 1995                          |
| Austria   | +      | 1990                          | Latvia         | +      | 2001                          |
| Bahrain   | ☒      | 1996                          | Luxembourg     | ☒      | 2002                          |
| Belgium   | *      | 1998                          | Macedonia      | *      | 2015                          |
| Brazil    | ●      | 2017                          | Mauritius      | ●      | 2004                          |
| Brunei    | ▲      | 1994                          | Mozambique     | ▲      | 2010                          |
| Bulgaria  | ■      | 2005                          | Nepal          | ■      | 2015                          |
| Canada    | +      | 2018                          | Netherlands    | +      | 1991                          |
| Chile     | ☒      | 2001                          | Norway         | ☒      | 1984                          |
| Colombia  | *      | 2019                          | Oman           | *      | 2008                          |
| Denmark   | ●      | 1985                          | Poland         | ●      | 1997                          |
| Egypt     | ▲      | 2005                          | Romania        | ▲      | 2008                          |
| Estonia   | ■      | 2001                          | Saudi Arabia   | ■      | 1998                          |
| Finland   | +      | 1993                          | Serbia         | +      | 2011                          |
| France    | ☒      | 1996                          | South Africa   | ☒      | 2008                          |
| Germany   | *      | 1993                          | South Korea    | *      | 2009                          |
| Honduras  | ●      | 2004                          | Spain          | ●      | 2002                          |
| Iceland   | ▲      | 1983                          | Sweden         | ▲      | 1986                          |
| Iraq      | ■      | 2016                          | Switzerland    | ■      | 1989                          |
| Ireland   | +      | 2000                          | Turkey         | +      | 2010                          |
| Israel    | ☒      | 1984                          | United Kingdom | ☒      | 1999                          |
| Italy     | *      | 1992                          |                |        |                               |

**eTable 2.** Deaths and Age-Standardized Death Rates for Mesothelioma Among Regions in 1990 and 2017 and Temporal Trends From 1990 to 2017

| Characteristics                | 1990                          |                   | 2017                          |                   | 1990-2017            |
|--------------------------------|-------------------------------|-------------------|-------------------------------|-------------------|----------------------|
|                                | Death cases                   | ASDR per 100,000  | Death cases                   | ASDR per 100,000  | EAPC                 |
|                                | No. ×10 <sup>2</sup> (95% UI) | No. (95% UI)      | No. ×10 <sup>2</sup> (95% UI) | No. (95% UI)      | No. (95% CI)         |
| <b>Global</b>                  | 174.06 (144.95- 206.6)        | 0.44 (0.37- 0.52) | 299.09 (291.34- 306.13)       | 0.38 (0.37- 0.39) | -0.44 (-0.52- -0.37) |
| <b>Socio-demographic index</b> |                               |                   |                               |                   |                      |
| High SDI                       | 112.26 (94.46- 125.92)        | 0.85 (0.72- 0.95) | 171.93 (165.5- 178.76)        | 0.75 (0.72- 0.78) | -0.39 (-0.44- -0.34) |
| High-middle SDI                | 24.11 (20.52- 29.77)          | 0.25 (0.21- 0.31) | 44.72 (42.2- 46.53)           | 0.25 (0.24- 0.26) | 0.1 (-0.11- 0.3)     |
| Middle SDI                     | 18.64 (16.25- 22.7)           | 0.19 (0.16- 0.22) | 42.94 (40.82- 44.85)          | 0.19 (0.19- 0.2)  | 0.01 (-0.14- 0.15)   |
| Low-middle SDI                 | 11.96 (8.35- 18.31)           | 0.2 (0.14- 0.3)   | 25.74 (22.74- 30.11)          | 0.22 (0.19- 0.25) | 0.29 (0.26- 0.32)    |
| Low SDI                        | 6.77 (3.99- 11.92)            | 0.19 (0.12- 0.33) | 13.1 (9.96- 18.66)            | 0.18 (0.14- 0.26) | -0.29 (-0.48- -0.09) |
| <b>Regions</b>                 |                               |                   |                               |                   |                      |
| Andean Latin America           | 1.35 (1.12- 1.66)             | 0.64 (0.53- 0.79) | 1.21 (1.09- 1.33)             | 0.22 (0.2- 0.25)  | -6 (-6.99- -4.99)    |
| Australasia                    | 4.78 (3.62- 5.5)              | 1.95 (1.48- 2.23) | 9.01 (8.06- 10)               | 1.79 (1.59- 1.98) | -0.18 (-0.32- -0.04) |
| Caribbean                      | 0.55 (0.43- 0.72)             | 0.2 (0.16- 0.26)  | 0.86 (0.76- 1)                | 0.17 (0.15- 0.2)  | -0.9 (-1.02- -0.77)  |
| Central Asia                   | 0.82 (0.74- 0.95)             | 0.16 (0.15- 0.19) | 1.43 (1.36- 1.5)              | 0.19 (0.18- 0.2)  | 0.3 (-0.09- 0.69)    |
| Central Europe                 | 2.95 (2.67- 3.39)             | 0.2 (0.18- 0.23)  | 6.24 (5.88- 6.64)             | 0.3 (0.29- 0.32)  | 2.15 (1.99- 2.32)    |
| Central Latin America          | 2.08 (1.83- 2.38)             | 0.23 (0.2- 0.26)  | 5.77 (5.52- 6.02)             | 0.24 (0.23- 0.26) | 0.44 (0.28- 0.6)     |
| Central Sub-Saharan Africa     | 0.46 (0.28- 0.77)             | 0.19 (0.11- 0.3)  | 0.85 (0.64- 1.19)             | 0.16 (0.12- 0.22) | -0.87 (-1.02- -0.72) |
| East Asia                      | 12.26 (9.61- 16.07)           | 0.13 (0.1- 0.17)  | 29.28 (27.09- 31.02)          | 0.14 (0.13- 0.15) | 1.08 (0.64- 1.51)    |
| Eastern Europe                 | 6.51 (5.7- 7.86)              | 0.23 (0.2- 0.28)  | 8.84 (8.47- 9.25)             | 0.26 (0.25- 0.28) | 0.11 (-0.28- 0.5)    |
| Eastern Sub-Saharan Africa     | 1.59 (0.86- 2.88)             | 0.19 (0.1- 0.33)  | 2.15 (1.42- 2.83)             | 0.13 (0.09- 0.17) | -1.87 (-2.11- -1.63) |
| High-income Asia Pacific       | 6.36 (5.62- 6.85)             | 0.32 (0.28- 0.34) | 17.02 (16.14- 18.31)          | 0.37 (0.35- 0.4)  | 1.14 (0.91- 1.38)    |



|                              |                      |                   |  |                        |                   |                      |
|------------------------------|----------------------|-------------------|--|------------------------|-------------------|----------------------|
| High-income North America    | 27.74 (24.57- 30.14) | 0.74 (0.66- 0.81) |  | 37.88 (36.39- 39.45)   | 0.6 (0.58- 0.63)  | -1 (-1.11- -0.88)    |
| North Africa and Middle East | 7.7 (4.67- 11.73)    | 0.42 (0.26- 0.63) |  | 16.69 (14.8- 18.48)    | 0.4 (0.36- 0.44)  | 0.07 (-0.25- 0.39)   |
| Oceania                      | 0.09 (0.06- 0.15)    | 0.26 (0.18- 0.41) |  | 0.23 (0.17- 0.35)      | 0.31 (0.24- 0.46) | 1.04 (0.9- 1.17)     |
| South Asia                   | 10.34 (6.72- 17.64)  | 0.17 (0.11- 0.28) |  | 27.56 (23.37- 34.82)   | 0.21 (0.17- 0.26) | 0.73 (0.57- 0.89)    |
| Southeast Asia               | 8.11 (6- 11.69)      | 0.27 (0.21- 0.39) |  | 13.38 (12.44- 14.48)   | 0.22 (0.21- 0.24) | -1.13 (-1.32- -0.94) |
| Southern Latin America       | 1.28 (1.16- 1.42)    | 0.27 (0.25- 0.3)  |  | 3 (2.74- 3.3)          | 0.37 (0.34- 0.41) | 1.78 (1.47- 2.08)    |
| Southern Sub-Saharan Africa  | 1.61 (1.36- 1.9)     | 0.57 (0.48- 0.68) |  | 3.37 (3.06- 3.76)      | 0.63 (0.57- 0.7)  | 0.19 (-0.52- 0.9)    |
| Tropical Latin America       | 4.13 (3.73- 5.06)    | 0.44 (0.4- 0.55)  |  | 8.64 (8.08- 9.05)      | 0.37 (0.35- 0.39) | -0.3 (-0.54- -0.05)  |
| Western Europe               | 71.47 (58.57- 81.36) | 1.19 (0.97- 1.35) |  | 103.03 (98.62- 107.71) | 1.11 (1.06- 1.16) | -0.14 (-0.24- -0.04) |
| Western Sub-Saharan Africa   | 1.86 (1.26- 2.42)    | 0.2 (0.13- 0.25)  |  | 2.66 (2.2- 3.17)       | 0.14 (0.11- 0.16) | -1.87 (-2.11- -1.64) |

ASDR: age standardized death rate; CI: confidence interval; EAPC: estimated annual percentage change; SDI: Socio-demographic index; UI: uncertainty interval.

**eTable 3.** DALYs and Age-Standardized DALY Rates for Mesothelioma Among Regions in 1990 and 2017 and Temporal Trends From 1990 to 2017

| Characteristics                | 1990                          |                      | 2017                          |                      | 1990-2017            |
|--------------------------------|-------------------------------|----------------------|-------------------------------|----------------------|----------------------|
|                                | DALY cases                    | ASR per 100,000      | DALY cases                    | ASR per 100,000      | EAPC                 |
|                                | No. ×10 <sup>3</sup> (95% UI) | No. (95% UI)         | No. ×10 <sup>3</sup> (95% UI) | No. (95% UI)         | No. (95% CI)         |
| <b>Global</b>                  | 431.94 (352.21- 527.02)       | 10.03 (8.25- 12.14)  | 670.69 (648.2- 693.05)        | 8.31 (8.03- 8.58)    | -0.71 (-0.76- -0.65) |
| <b>Socio-demographic index</b> |                               |                      |                               |                      |                      |
| High SDI                       | 235.84 (197.32- 264.82)       | 18.49 (15.5- 20.75)  | 311.21 (299.63- 324.45)       | 14.89 (14.32- 15.55) | -0.78 (-0.81- -0.76) |
| High-middle SDI                | 71.63 (60.1- 89.54)           | 7 (5.89- 8.72)       | 118.21 (111.27- 123.44)       | 6.53 (6.14- 6.82)    | -0.25 (-0.44- -0.05) |
| Middle SDI                     | 61.17 (52.08- 75.44)          | 5.21 (4.52- 6.38)    | 122.5 (116- 127.92)           | 5.24 (4.97- 5.47)    | -0.19 (-0.35- -0.03) |
| Low-middle SDI                 | 40.24 (26.27- 63.62)          | 5.66 (3.86- 8.79)    | 76.77 (66.76- 90.31)          | 5.68 (4.98- 6.66)    | -0.06 (-0.11- -0.02) |
| Low SDI                        | 22.1 (12.63- 39.74)           | 5.37 (3.15- 9.53)    | 40.27 (30.34- 58.52)          | 4.84 (3.69- 6.95)    | -0.48 (-0.67- -0.29) |
| <b>Regions</b>                 |                               |                      |                               |                      |                      |
| Andean Latin America           | 3.78 (3.11- 4.7)              | 15.8 (13.05- 19.64)  | 3.04 (2.72- 3.36)             | 5.43 (4.86- 6)       | -5.93 (-6.86- -5)    |
| Australasia                    | 10.08 (7.58- 11.58)           | 41.79 (31.44- 47.89) | 15.63 (13.92- 17.36)          | 33.06 (29.54- 36.69) | -0.83 (-0.95- -0.71) |
| Caribbean                      | 1.78 (1.31- 2.39)             | 6.06 (4.53- 8.11)    | 2.52 (2.18- 3.06)             | 4.98 (4.29- 6.05)    | -0.94 (-1.07- -0.8)  |
| Central Asia                   | 2.63 (2.39- 3.03)             | 4.82 (4.37- 5.56)    | 4.38 (4.16- 4.58)             | 5.23 (4.97- 5.47)    | -0.07 (-0.49- 0.34)  |
| Central Europe                 | 8.43 (7.61- 9.7)              | 5.67 (5.1- 6.52)     | 15.22 (14.34- 16.27)          | 8.06 (7.6- 8.64)     | 1.74 (1.59- 1.89)    |
| Central Latin America          | 6.53 (5.68- 7.51)             | 6.31 (5.54- 7.23)    | 16.03 (15.3- 16.79)           | 6.54 (6.24- 6.85)    | 0.26 (0.11- 0.41)    |
| Central Sub-Saharan Africa     | 1.51 (0.9- 2.56)              | 5.13 (3.12- 8.52)    | 2.7 (2.01- 3.87)              | 4.2 (3.17- 5.93)     | -1.09 (-1.24- -0.93) |
| East Asia                      | 40.53 (30.26- 54.09)          | 3.68 (2.82- 4.88)    | 81.36 (75.11- 86.41)          | 3.93 (3.63- 4.17)    | 0.68 (0.23- 1.13)    |
| Eastern Europe                 | 17.51 (15.28- 21.48)          | 6.2 (5.41- 7.61)     | 22.67 (21.66- 23.83)          | 7.22 (6.89- 7.61)    | 0.03 (-0.44- 0.5)    |
| Eastern Sub-Saharan Africa     | 5.24 (2.84- 9.78)             | 5.36 (2.91- 9.81)    | 6.71 (4.55- 9.27)             | 3.41 (2.27- 4.53)    | -2.27 (-2.54- -2)    |
| High-income Asia Pacific       | 14.57 (12.96- 15.62)          | 6.95 (6.17- 7.45)    | 29.5 (27.87- 32.02)           | 7.55 (7.13- 8.25)    | 0.82 (0.57- 1.08)    |

|                              |                        |                      |  |                         |                      |                      |
|------------------------------|------------------------|----------------------|--|-------------------------|----------------------|----------------------|
| High-income North America    | 55.06 (48.6- 59.96)    | 15.51 (13.71- 16.9)  |  | 67.85 (65.33- 70.4)     | 11.4 (10.99- 11.82)  | -1.47 (-1.62- -1.31) |
| North Africa and Middle East | 24.08 (14.22- 37.04)   | 11.6 (6.96- 17.73)   |  | 47.2 (40.95- 53.75)     | 9.84 (8.64- 11.04)   | -0.47 (-0.76- -0.18) |
| Oceania                      | 0.31 (0.2- 0.53)       | 7.7 (5.15- 12.73)    |  | 0.82 (0.58- 1.27)       | 9.17 (6.72- 13.93)   | 0.98 (0.83- 1.12)    |
| South Asia                   | 32.58 (20.48- 57.06)   | 4.48 (2.89- 7.7)     |  | 78.06 (65.59- 100.78)   | 5.23 (4.43- 6.68)    | 0.52 (0.36- 0.68)    |
| Southeast Asia               | 30.34 (21.31- 45.61)   | 8.62 (6.28- 12.61)   |  | 42.75 (39.06- 46.77)    | 6.35 (5.82- 6.93)    | -1.52 (-1.76- -1.28) |
| Southern Latin America       | 3.45 (3.08- 3.84)      | 7.23 (6.47- 8.06)    |  | 7.19 (6.53- 7.96)       | 9.21 (8.36- 10.2)    | 1.48 (1.2- 1.77)     |
| Southern Sub-Saharan Africa  | 4.54 (3.86- 5.24)      | 14.58 (12.35- 17.07) |  | 8.57 (7.77- 9.64)       | 14.59 (13.22- 16.32) | -0.27 (-1.05- 0.52)  |
| Tropical Latin America       | 12.53 (11.26- 15.56)   | 11.52 (10.38- 14.13) |  | 23.94 (22.41- 25.2)     | 9.85 (9.22- 10.36)   | -0.26 (-0.46- -0.07) |
| Western Europe               | 150.4 (122.62- 171.22) | 26.33 (21.54- 29.97) |  | 185.75 (177.51- 195.37) | 22.37 (21.33- 23.58) | -0.57 (-0.62- -0.53) |
| Western Sub-Saharan Africa   | 6.07 (4.11- 7.98)      | 5.48 (3.7- 7.13)     |  | 8.79 (7.19- 10.73)      | 3.64 (3.02- 4.37)    | -2.09 (-2.34- -1.84) |

ASR: age standardized rate; CI: confidence interval; DALY: disability adjusted life-year; EAPC: estimated annual percentage change; SDI: Socio-demographic index; UI: uncertainty interval.

**eTable 4.** Countries With the Highest and Lowest ASRs or Temporal Trends Using Different Measures

| Measure   |     | ASR (per 100k)     |                   |                    | Percent Change (%) |                             |                             | EAPC             |                  |                             |
|-----------|-----|--------------------|-------------------|--------------------|--------------------|-----------------------------|-----------------------------|------------------|------------------|-----------------------------|
|           |     | 1st                | 2nd               | 3rd                | 1st                | 2nd                         | 3rd                         | 1st              | 2nd              | 3rd                         |
| Incidence | Max | UK (2.52)          | Australia (2.30)  | Andorra (2.25)     | Georgia (343%)     | United Arab Emirates (224%) | Libya (205%)                | Georgia (7.33)   | Croatia (5.39)   | Iran (5.21)                 |
|           | Min | Macedonia (0.076)  | Palestine (0.084) | Cape Verde (0.089) | Peru (-77%)        | Maldives (-63%)             | Mongolia (-62%)             | Peru (-8.18)     | Mongolia (-5.23) | Rwanda (-4.19)              |
| Death     | Max | UK (2.13)          | Andorra (1.95)    | Australia (1.89)   | Iran (490%)        | Qatar (425%)                | United Arab Emirates (397%) | Georgia (7.58)   | Croatia (5.74)   | Iran (5.38)                 |
|           | Min | Macedonia (0.053)  | Palestine (0.065) | Cape Verde (0.071) | Peru (-45%)        | Bermuda (-30%)              | Grenada (-26%)              | Peru (-8.20)     | Mongolia (-4.98) | Burundi (-3.83)             |
| DALY      | Max | UK (40.10)         | Andorra (38.83)   | Australia (34.82)  | Iran (566%)        | Georgia (457%)              | Saudi Arabia (414%)         | Georgia (7.60)   | Croatia (5.28)   | United Arab Emirates (4.90) |
|           | Min | Macedonia (1.61)   | Palestine (1.94)  | Cape Verde (1.95)  | Bermuda (-36%)     | Peru (-32%)                 | Mali (-22%)                 | Peru (-8.14)     | Mongolia (-4.89) | Maldives (-4.42)            |
|           |     | ASIR (per 100k)    |                   |                    | ASDR (per 100k)    |                             |                             | EAPC of ASIR     |                  |                             |
|           |     | 1st                | 2nd               | 3rd                | 1st                | 2nd                         | 3rd                         | 1st              | 2nd              | 3rd                         |
| Female    | Max | Afghanistan (1.10) | Australia (0.85)  | UK (0.80)          | UK (0.74)          | Afghanistan (0.70)          | Australia (0.65)            | Georgia (5.60)   | Argentina (4.02) | Lesotho (3.91)              |
|           | Min | Dominica (0.046)   | Guam (0.053)      | Palestine (0.055)  | Dominica (0.031)   | Tunisia (0.034)             | Guam (0.038)                | Mongolia (-8.91) | Maldives (-8.76) | Peru (-8.40)                |
| Male      | Max | UK (4.60)          | Andorra (4.27)    | Australia (3.98)   | UK (3.80)          | Andorra (3.76)              | Australia (3.33)            | Georgia (9.28)   | Croatia (6.33)   | Libya (5.94)                |
|           | Min | Nigeria (0.058)    | Mali (0.067)      | Niger (0.070)      | Nigeria (0.052)    | Mali (0.059)                | Niger (0.060)               | Peru (-7.98)     | Ghana (-4.06)    | Bermuda (-3.37)             |

ASR: age standardized rate; ASDR: age standardized death rate; ASIR: age standardized incidence rate; DALY: disability adjusted life-year; EAPC: estimated annual percentage change.

**eTable 5.** Incident Cases of Mesothelioma Among Countries and Territories in 1990 and 2017 and Temporal Trends From 1990 to 2017

| Location            | Incident Cases No. (95% UI) |                         | Age-standardized percent change (%) | EAPC No. (95% CI)    |
|---------------------|-----------------------------|-------------------------|-------------------------------------|----------------------|
|                     | 1990                        | 2017                    | 1990-2017                           | 1990-2017            |
| Afghanistan         | 49.17 (11.37- 132.98)       | 134.74 (45.73- 309.66)  | 20.72 (-22.88- 182.25)              | 1.09 (0.64- 1.53)    |
| Albania             | 3.38 (2.16- 5.14)           | 7.05 (4.21- 12.53)      | 24.37 (-16.45- 78.63)               | 1.15 (0.87- 1.42)    |
| Algeria             | 10.14 (7.15- 13.6)          | 53.24 (39.86- 76.36)    | 116.6 (39.82- 209.39)               | 3.7 (3.2- 4.21)      |
| American Samoa      | 0.09 (0.07- 0.1)            | 0.21 (0.18- 0.25)       | 16.07 (-11.69- 48.09)               | 1.94 (1.5- 2.39)     |
| Andorra             | 1.47 (1.09- 1.87)           | 2.95 (2.17- 3.74)       | -9.82 (-37.31- 30.45)               | -0.3 (-0.39- -0.22)  |
| Angola              | 13.6 (6.18- 25.8)           | 26.19 (17.71- 37.93)    | -19.94 (-49.15- 39.26)              | -1.46 (-1.61- -1.31) |
| Antigua and Barbuda | 0.09 (0.08- 0.1)            | 0.11 (0.1- 0.13)        | -41.34 (-51.44- -29.95)             | -2.37 (-2.69- -2.05) |
| Argentina           | 95.75 (86.37- 108.63)       | 257.98 (224.94- 298.81) | 58.68 (28.89- 91.9)                 | 2.77 (2.39- 3.15)    |
| Armenia             | 21.28 (17.11- 28.33)        | 27.91 (24.79- 31.47)    | -7.49 (-31.11- 18.9)                | -0.44 (-0.7- -0.18)  |
| Australia           | 487.07 (366.51- 578.13)     | 967.98 (819.09- 1146.4) | -6.02 (-26.41- 32.03)               | 0.05 (-0.1- 0.21)    |
| Austria             | 103.94 (77.61- 124.62)      | 133.31 (119.44- 153.74) | -12.62 (-32.5- 26.32)               | -0.04 (-0.29- 0.22)  |
| Azerbaijan          | 6.92 (5.81- 8.15)           | 13.97 (11.6- 16.95)     | 13.55 (-9.51- 43.45)                | 0.2 (-0.29- 0.68)    |
| Bahrain             | 0.43 (0.35- 0.52)           | 3.17 (2.56- 3.9)        | 58.26 (15.24- 115.65)               | 3.01 (1.92- 4.12)    |
| Bangladesh          | 145.97 (83.59- 270.59)      | 153.43 (111.58- 224.36) | -52.96 (-67.04- -27.14)             | -2.99 (-3.1- -2.87)  |
| Barbados            | 0.73 (0.63- 0.84)           | 1.02 (0.89- 1.18)       | -18.46 (-34.04- 1.87)               | -0.99 (-1.2- -0.78)  |
| Belarus             | 25.97 (20.52- 34.07)        | 39.38 (33.42- 47.42)    | 30.52 (0.99- 64.19)                 | 0.93 (0.18- 1.7)     |
| Belgium             | 211.46 (172.83- 246.59)     | 295.07 (258.01- 337.64) | -4.49 (-24.02- 25.03)               | 0.24 (0.09- 0.4)     |
| Belize              | 0.49 (0.4- 0.61)            | 1.9 (1.65- 2.3)         | 30.18 (2.43- 69.8)                  | 0.05 (-0.48- 0.59)   |
| Benin               | 5.45 (3.24- 8.01)           | 11.58 (8.21- 16.41)     | -6.1 (-34.63- 40.65)                | -0.74 (-0.91- -0.56) |
| Bermuda             | 0.75 (0.55- 0.93)           | 0.55 (0.48- 0.63)       | -61.58 (-70.54- -43.39)             | -3.59 (-3.79- -3.39) |
| Bhutan              | 0.64 (0.38- 1.13)           | 1.23 (0.89- 1.68)       | -9.96 (-49.33- 64.56)               | -0.48 (-0.61- -0.36) |

|                          |                           |                            |                         |                      |
|--------------------------|---------------------------|----------------------------|-------------------------|----------------------|
| Bolivia                  | 29.74 (16.94- 46.73)      | 42.72 (33.43- 52.93)       | -40.76 (-62.3- -2.39)   | -2.24 (-2.52- -1.96) |
| Bosnia and Herzegovina   | 11.13 (8.32- 15.84)       | 10.87 (9.26- 12.97)        | -23.42 (-48.29- 8.29)   | -1.38 (-1.7- -1.07)  |
| Botswana                 | 4.47 (3.05- 6.37)         | 7.89 (5.74- 11.54)         | -14.81 (-44.17- 23.23)  | -0.95 (-1.11- -0.8)  |
| Brazil                   | 547.65 (484.67- 681.37)   | 1077.7 (1002.89- 1145.76)  | -16.18 (-34- -2.35)     | -0.33 (-0.58- -0.08) |
| Brunei                   | 0.54 (0.34- 0.78)         | 1.52 (1.34- 1.74)          | -5.66 (-34.58- 47.84)   | 0.08 (-0.24- 0.41)   |
| Bulgaria                 | 13.05 (10.6- 16.28)       | 14.58 (12.9- 16.86)        | 13.05 (-12.03- 49.25)   | -0.14 (-0.54- 0.25)  |
| Burkina Faso             | 18.14 (9.25- 28.91)       | 22.92 (14.33- 35.67)       | -34.52 (-52.89- -4.16)  | -2.34 (-2.74- -1.95) |
| Burundi                  | 10.78 (5.91- 20.53)       | 8.09 (5.01- 13.53)         | -55.81 (-69.14- -28.39) | -4.17 (-4.59- -3.74) |
| Cambodia                 | 21 (11.17- 38.5)          | 36.82 (28.04- 50.87)       | -20.82 (-48.12- 26.2)   | -1.03 (-1.12- -0.95) |
| Cameroon                 | 20.19 (13.09- 28.22)      | 39.75 (29.48- 54.12)       | -20.18 (-44.44- 31.39)  | -1.53 (-1.9- -1.17)  |
| Canada                   | 399.25 (316.89- 467.14)   | 642.12 (581.25- 711.96)    | -23.21 (-36.82- 1.11)   | -0.91 (-0.96- -0.85) |
| Cape Verde               | 0.18 (0.13- 0.24)         | 0.42 (0.36- 0.5)           | 13.07 (-25.19- 69.14)   | 0.01 (-0.15- 0.18)   |
| Central African Republic | 4.74 (2.41- 9.22)         | 7.32 (4.4- 13.16)          | -12.1 (-34.63- 32.75)   | -0.72 (-0.86- -0.57) |
| Chad                     | 8.2 (3.76- 12.98)         | 11.82 (6.8- 19.13)         | -27.89 (-48.5- 11.99)   | -1.47 (-1.61- -1.33) |
| Chile                    | 45.29 (35.95- 54.39)      | 72.99 (63.36- 84.41)       | -25.53 (-42.41- 0.52)   | -0.83 (-0.98- -0.68) |
| China                    | 1304.73 (994.53- 1731.33) | 2876.51 (2641.65- 3053.12) | 11.95 (-20.47- 48.06)   | 0.87 (0.41- 1.33)    |
| Colombia                 | 59.78 (48.82- 70.41)      | 129.75 (109.78- 154.99)    | -18.82 (-36.57- 12.4)   | -0.82 (-1.02- -0.63) |
| Comoros                  | 0.52 (0.29- 0.93)         | 0.86 (0.59- 1.24)          | -12.41 (-43.74- 45.41)  | -1.23 (-1.47- -0.99) |
| Congo                    | 6.17 (3.48- 10.07)        | 10.15 (7.24- 14.26)        | -27.94 (-55.07- 13.37)  | -1.89 (-2.2- -1.57)  |
| Costa Rica               | 3.67 (3.3- 4.16)          | 8.48 (7.54- 9.71)          | -20.13 (-32.58- -4.53)  | -1.06 (-1.53- -0.59) |
| Cote d'Ivoire            | 18.14 (11.01- 26.4)       | 36.55 (25.05- 51.9)        | -10.36 (-36.44- 31.98)  | -1.19 (-1.52- -0.86) |
| Croatia                  | 26.89 (22.03- 31.69)      | 84.79 (73.44- 99.32)       | 155.9 (101.08- 236.62)  | 5.39 (4.29- 6.5)     |
| Cuba                     | 20.68 (16.37- 24.72)      | 25.6 (22.07- 30.16)        | -24.17 (-39.65- -2.8)   | -1.11 (-1.4- -0.82)  |
| Cyprus                   | 11.06 (8.12- 14.85)       | 15.42 (12.95- 18.27)       | -37.88 (-57.91- -7.28)  | -1.84 (-2.14- -1.53) |
| Czech Republic           | 57.14 (46.26- 69.9)       | 63.16 (55.22- 73.15)       | -22.15 (-40.2- 5.33)    | -0.7 (-0.84- -0.56)  |

|                                  |                            |                            |                         |                      |
|----------------------------------|----------------------------|----------------------------|-------------------------|----------------------|
| Democratic Republic of the Congo | 37.61 (22.98- 64.41)       | 68.92 (46.11- 108.31)      | -8.91 (-32.29- 26.14)   | -0.69 (-0.89- -0.49) |
| Denmark                          | 103.03 (89.53- 117.8)      | 152.87 (135.09- 176.45)    | 2.37 (-16.82- 31.06)    | 0.22 (0.11- 0.33)    |
| Djibouti                         | 0.33 (0.19- 0.58)          | 1.09 (0.73- 1.76)          | 10.99 (-32.38- 89.63)   | -0.24 (-0.4- -0.08)  |
| Dominica                         | 0.18 (0.15- 0.21)          | 0.33 (0.28- 0.4)           | 34.83 (3.76- 76.7)      | 1.21 (1.13- 1.3)     |
| Dominican Republic               | 5.01 (4.26- 6)             | 12.18 (10.04- 15.13)       | 8.55 (-16.52- 41.67)    | 0.36 (-0.13- 0.85)   |
| Ecuador                          | 12.5 (10.15- 14.66)        | 34.92 (30.16- 40.22)       | 18.91 (-7.14- 57.06)    | 0.97 (0.48- 1.46)    |
| Egypt                            | 35.87 (18.38- 60.35)       | 170.57 (84.98- 259.96)     | 157.87 (96.05- 250.65)  | 4.12 (3.56- 4.67)    |
| El Salvador                      | 5.8 (4.85- 7.05)           | 10.04 (7.89- 12.92)        | -0.29 (-29.21- 34.24)   | -0.28 (-0.49- -0.06) |
| Equatorial Guinea                | 0.8 (0.4- 1.65)            | 0.83 (0.51- 1.33)          | -53.16 (-78.74- -5.23)  | -3.56 (-3.98- -3.14) |
| Eritrea                          | 4.64 (2.56- 8.74)          | 8.58 (5.84- 12.32)         | -5.16 (-40.38- 58.83)   | -0.98 (-1.06- -0.9)  |
| Estonia                          | 3.66 (3.17- 4.25)          | 6.23 (5.21- 7.43)          | 46.15 (11.32- 87.55)    | 1.26 (0.81- 1.71)    |
| Ethiopia                         | 97.5 (46.89- 196.76)       | 70.94 (40.16- 102.07)      | -58.3 (-75.64- -12.45)  | -4 (-4.32- -3.68)    |
| Federated States of Micronesia   | 0.21 (0.16- 0.31)          | 0.36 (0.24- 0.48)          | 2.96 (-27.53- 39.33)    | 0.77 (0.71- 0.83)    |
| Fiji                             | 1.01 (0.82- 1.24)          | 2.72 (2.22- 3.35)          | 25.52 (-5.54- 69.69)    | 1.71 (1.23- 2.19)    |
| Finland                          | 82.39 (64.17- 96.98)       | 112.6 (98.66- 129.95)      | -19.48 (-36.53- 9.79)   | -0.48 (-0.67- -0.29) |
| France                           | 1085.86 (889.85- 1277.62)  | 1889.79 (1651.3- 2170.13)  | 10.71 (-13.43- 48.52)   | 0.58 (0.22- 0.94)    |
| Gabon                            | 1.86 (1.11- 2.82)          | 2.77 (2.2- 4.2)            | -17.1 (-47.91- 36.9)    | -1.14 (-1.65- -0.62) |
| Georgia                          | 7.58 (5.9- 9.09)           | 29.49 (25.83- 34.25)       | 342.75 (249.63- 473.48) | 7.33 (6.06- 8.61)    |
| Germany                          | 1491.99 (1197.72- 1735.74) | 2063.11 (1786.24- 2398.36) | -10.01 (-27.29- 16.7)   | -0.11 (-0.23- 0.01)  |
| Ghana                            | 32.02 (25.46- 40.09)       | 42.63 (32.34- 55.27)       | -40.24 (-58.5- -16.46)  | -3.27 (-3.82- -2.71) |
| Greece                           | 62.24 (48.79- 76.66)       | 87.29 (77.81- 97.51)       | -0.29 (-22.27- 28.72)   | -0.09 (-0.16- -0.02) |
| Greenland                        | 0.44 (0.3- 0.57)           | 0.74 (0.65- 0.83)          | -10.59 (-35.99- 37.48)  | -0.12 (-0.62- 0.39)  |
| Grenada                          | 0.42 (0.34- 0.54)          | 0.44 (0.39- 0.51)          | -52.05 (-64.28- -37.7)  | -1.94 (-2.44- -1.43) |
| Guam                             | 0.19 (0.15- 0.23)          | 0.59 (0.5- 0.7)            | 22.41 (-7.06- 63.5)     | 2.33 (1.7- 2.95)     |
| Guatemala                        | 8.55 (6.67- 11.67)         | 18.83 (16.23- 22.29)       | -9.65 (-36.51- 22.71)   | -1.25 (-1.51- -0.99) |

|               |                            |                            |                         |                      |
|---------------|----------------------------|----------------------------|-------------------------|----------------------|
| Guinea        | 12.06 (5.97- 18.37)        | 17.83 (11.85- 27.4)        | -4.68 (-35.69- 64.38)   | -0.5 (-0.71- -0.29)  |
| Guinea-Bissau | 2.96 (1.52- 5.04)          | 3.74 (2.31- 5.94)          | -22.86 (-48.21- 26.19)  | -1.61 (-1.76- -1.46) |
| Guyana        | 2.21 (1.82- 2.65)          | 2.85 (2.4- 3.39)           | -6.32 (-27.07- 19.75)   | -0.64 (-1.16- -0.13) |
| Haiti         | 25.06 (11.87- 46.39)       | 34.84 (22.62- 56.09)       | -31.15 (-51.87- 17.29)  | -1.22 (-1.43- -1)    |
| Honduras      | 6.19 (4.49- 9.15)          | 22.31 (16.17- 31.39)       | 36.53 (-12.59- 115.72)  | 1.31 (1.1- 1.53)     |
| Hungary       | 47.42 (40.8- 56.48)        | 49.12 (43.54- 56.31)       | -12.27 (-29.6- 9.38)    | -0.68 (-0.9- -0.46)  |
| Iceland       | 2.45 (2.07- 2.84)          | 5.29 (4.69- 6.07)          | 16.8 (-3.97- 47.29)     | 0.33 (0- 0.66)       |
| India         | 1120.66 (706.43- 1958.5)   | 3030.61 (2545.97- 3875.25) | 28.46 (-7.85- 73.64)    | 0.9 (0.69- 1.11)     |
| Indonesia     | 238.34 (163.68- 335.56)    | 552.73 (476.85- 626.62)    | 23.88 (-4.8- 59.73)     | 1.01 (0.75- 1.26)    |
| Iran          | 88.51 (68.09- 125.61)      | 578.52 (500.35- 692.66)    | 158.64 (67.71- 253.24)  | 5.21 (4.33- 6.09)    |
| Iraq          | 31.14 (20.73- 44.35)       | 51.93 (44.95- 61.83)       | -43.62 (-63.15- -14.04) | -2.68 (-3.48- -1.87) |
| Ireland       | 45.03 (29.08- 57.33)       | 48.46 (41.96- 56.58)       | -37.6 (-53.89- 5.42)    | -1.83 (-1.98- -1.68) |
| Israel        | 32.64 (28.16- 37.51)       | 49.33 (43.02- 57.04)       | -33.67 (-47.49- -14.99) | -1.73 (-1.94- -1.51) |
| Italy         | 1408.81 (1012.71- 1733.32) | 1746.21 (1555.42- 1954.99) | -18.61 (-37.97- 21.12)  | -0.74 (-0.81- -0.66) |
| Jamaica       | 3.78 (3.22- 4.4)           | 6.51 (4.87- 8.52)          | 5.8 (-24.67- 50.44)     | -1.29 (-2.16- -0.4)  |
| Japan         | 634.67 (558.69- 698.27)    | 1538.77 (1440.29- 1669.82) | 22.65 (7.75- 49.73)     | 1.32 (1.08- 1.55)    |
| Jordan        | 5.6 (3.56- 7.87)           | 13.91 (10.98- 17.35)       | -32.8 (-59.24- 14.72)   | -2.09 (-2.48- -1.7)  |
| Kazakhstan    | 46.32 (39.28- 56.29)       | 58.28 (51.77- 66.9)        | 0.89 (-21.22- 23.83)    | -0.57 (-1.34- 0.2)   |
| Kenya         | 14.24 (9.2- 20.55)         | 39.44 (31.09- 57.45)       | 20.69 (-2.68- 53.14)    | -0.06 (-0.43- 0.31)  |
| Kiribati      | 0.07 (0.06- 0.08)          | 0.16 (0.13- 0.2)           | 23.49 (-7.64- 70.21)    | 1.42 (1.21- 1.64)    |
| Kuwait        | 1.21 (1.07- 1.46)          | 7.08 (5.7- 9.04)           | 72.11 (35.55- 131.5)    | 2.86 (1.73- 4)       |
| Kyrgyzstan    | 3.38 (2.86- 3.98)          | 6.89 (5.77- 8.66)          | 45.67 (13.92- 91.86)    | 1.48 (1.15- 1.82)    |
| Laos          | 9.96 (4.27- 18.91)         | 12.56 (8.8- 17.78)         | -36.48 (-60.42- 19.6)   | -1.95 (-2.07- -1.83) |
| Latvia        | 9.77 (8.38- 11.52)         | 11.62 (9.95- 13.66)        | 19.13 (-8.23- 51.06)    | 0.26 (-0.27- 0.78)   |
| Lebanon       | 3.03 (1.97- 4.18)          | 8.47 (6.03- 13.23)         | 4.85 (-37.62- 61.01)    | 0.58 (0.38- 0.78)    |



|                  |                         |                         |                         |                      |
|------------------|-------------------------|-------------------------|-------------------------|----------------------|
| Lesotho          | 11.12 (7.24- 16.07)     | 17.7 (13.39- 23.9)      | 36.63 (-9.33- 106.97)   | 1.29 (0.92- 1.66)    |
| Liberia          | 2.87 (1.64- 4.46)       | 4.46 (3.09- 6.86)       | -15.63 (-39.37- 26.66)  | -1.04 (-1.34- -0.74) |
| Libya            | 2.41 (1.57- 3.33)       | 18.45 (10.64- 30.8)     | 204.65 (85.34- 374.5)   | 4.92 (4.57- 5.28)    |
| Lithuania        | 18.17 (15.8- 21.11)     | 13.35 (11.99- 14.92)    | -36.06 (-47.88- -21.93) | -2.32 (-2.83- -1.8)  |
| Luxembourg       | 6.53 (5.04- 7.82)       | 9.62 (8.03- 11.77)      | -13.16 (-34.78- 31.01)  | -0.45 (-0.58- -0.33) |
| Macedonia        | 2.23 (1.72- 2.91)       | 2.37 (1.98- 2.84)       | -29.66 (-51.03- -0.11)  | -2.04 (-2.46- -1.62) |
| Madagascar       | 10.06 (5.85- 18.27)     | 15.8 (9.54- 26.54)      | -19.52 (-38.74- 8.46)   | -1.15 (-1.27- -1.04) |
| Malawi           | 7.23 (3.15- 14.27)      | 11.17 (6.82- 17.09)     | -4.3 (-36.2- 82.24)     | -1.44 (-1.94- -0.94) |
| Malaysia         | 19.71 (16.35- 25.21)    | 56 (46.19- 68.58)       | -2.58 (-30.17- 30.71)   | 0.8 (0.64- 0.95)     |
| Maldives         | 1.53 (0.66- 2.7)        | 1.67 (1.36- 2.13)       | -63.08 (-81.28- -16.35) | -4.16 (-4.4- -3.93)  |
| Mali             | 17.67 (8.68- 29.89)     | 15.59 (9.13- 24.08)     | -50.39 (-64.35- -25.75) | -3.48 (-3.92- -3.05) |
| Malta            | 4.75 (3.95- 5.54)       | 10.7 (9.39- 12.24)      | 10.44 (-9.67- 37.58)    | 0.55 (0.39- 0.71)    |
| Marshall Islands | 0.06 (0.04- 0.1)        | 0.17 (0.11- 0.24)       | 18.96 (-14.59- 63.95)   | 1.23 (0.93- 1.53)    |
| Mauritania       | 4.72 (3.09- 6.7)        | 4.58 (3.63- 5.77)       | -46.04 (-63.02- -17.31) | -3.07 (-3.42- -2.72) |
| Mauritius        | 1.22 (1.02- 1.48)       | 1.82 (1.61- 2.15)       | -32.54 (-48.29- -13.34) | -0.6 (-0.97- -0.22)  |
| Mexico           | 163.32 (141.89- 186.98) | 472.06 (451.45- 496.38) | 31.61 (12.84- 51.31)    | 1.09 (0.86- 1.32)    |
| Moldova          | 8.06 (6.7- 9.96)        | 8.54 (7.35- 9.89)       | -4.43 (-25.22- 19.8)    | -0.92 (-1.45- -0.38) |
| Mongolia         | 5.07 (3.57- 6.67)       | 4.54 (3.66- 5.64)       | -61.62 (-73.3- -42.15)  | -5.23 (-5.97- -4.48) |
| Montenegro       | 1.17 (1.03- 1.35)       | 1.98 (1.63- 2.33)       | 14.34 (-8.85- 40.34)    | 0.37 (-0.02- 0.77)   |
| Morocco          | 14.94 (7.9- 25.28)      | 66.95 (43.31- 93.91)    | 134.24 (53.79- 253.17)  | 3.78 (3.41- 4.15)    |
| Mozambique       | 14.75 (7.3- 28.34)      | 22.75 (14.65- 39.01)    | -6.87 (-32.49- 46.64)   | -0.6 (-0.91- -0.29)  |
| Myanmar          | 378.11 (142.71- 773.51) | 284.82 (201.41- 382.58) | -54.12 (-73.48- -7.07)  | -3.17 (-3.43- -2.91) |
| Namibia          | 8.35 (5.8- 11.43)       | 11.39 (8.82- 15.28)     | -21.93 (-46.89- 8.98)   | -1.86 (-2.37- -1.34) |
| Nepal            | 22.16 (11.35- 42.79)    | 43.08 (29.79- 61.96)    | 5.82 (-32.06- 85.8)     | -0.09 (-0.49- 0.31)  |
| Netherlands      | 467.54 (394.44- 542.35) | 680.42 (598.04- 773.37) | -15.02 (-30.83- 6.03)   | -0.57 (-0.73- -0.4)  |

|                                  |                         |                         |                         |                      |
|----------------------------------|-------------------------|-------------------------|-------------------------|----------------------|
| New Zealand                      | 64.36 (43.88- 76.9)     | 96.87 (86.67- 107.66)   | -20.38 (-36.54- 23.02)  | -0.58 (-0.97- -0.2)  |
| Nicaragua                        | 1.76 (1.4- 2.22)        | 5.62 (4.58- 7.04)       | 21.07 (-15.68- 64.95)   | 0.8 (0.62- 0.98)     |
| Niger                            | 8.65 (4.05- 14.38)      | 12.04 (6.65- 20.17)     | -38.74 (-54.99- -14.67) | -2.83 (-3.19- -2.46) |
| Nigeria                          | 93.05 (62.68- 128.19)   | 111.8 (71.93- 165.23)   | -32.97 (-56.85- 2.51)   | -2.52 (-2.77- -2.27) |
| North Korea                      | 25.44 (17.54- 34.95)    | 73.45 (54.8- 101.11)    | 49.86 (10.45- 105.85)   | 2.35 (2.04- 2.66)    |
| Northern Mariana Islands         | 0.03 (0.02- 0.04)       | 0.07 (0.06- 0.09)       | -18.8 (-36.8- 7.42)     | 0.58 (0.19- 0.97)    |
| Norway                           | 72.46 (60.27- 83.79)    | 85.2 (76.67- 96.5)      | -18.61 (-32.9- 7.62)    | -0.28 (-0.53- -0.02) |
| Oman                             | 2.29 (1.49- 3.69)       | 10.44 (7.23- 14.64)     | 63.43 (-17.83- 193.39)  | 2.79 (2.37- 3.22)    |
| Pakistan                         | 86.54 (54.36- 140.67)   | 245.86 (180.52- 332.46) | 43.92 (0.96- 112.3)     | 0.79 (0.42- 1.15)    |
| Palestine                        | 1.06 (0.68- 1.65)       | 2.53 (2.13- 3.14)       | -22.99 (-53.92- 28.51)  | -1.17 (-1.35- -1)    |
| Panama                           | 2.77 (2.41- 3.17)       | 6.72 (5.87- 7.8)        | -13.3 (-28.96- 6.2)     | 0.09 (-0.1- 0.29)    |
| Papua New Guinea                 | 8.87 (4.94- 16.27)      | 23.52 (14.86- 40.55)    | 6.89 (-17.41- 44.68)    | 0.71 (0.53- 0.89)    |
| Paraguay                         | 4.18 (3.5- 4.96)        | 13.69 (10.96- 17.23)    | 25.15 (-7.15- 70.41)    | 1.29 (1.16- 1.42)    |
| Peru                             | 130.64 (105.04- 160.88) | 70.79 (57.98- 84.74)    | -77.04 (-83.19- -69.25) | -8.18 (-9.44- -6.89) |
| Philippines                      | 91.48 (78.69- 113.57)   | 192.5 (160.69- 235.26)  | 4.78 (-18.74- 33.29)    | -0.19 (-0.33- -0.05) |
| Poland                           | 120.03 (98.9- 145.24)   | 391.02 (343.63- 444.32) | 123 (71.01- 189.57)     | 4.02 (3.53- 4.52)    |
| Portugal                         | 47.95 (36.56- 58.93)    | 79.19 (68.97- 91.54)    | 6.15 (-21.33- 56.81)    | 0.14 (-0.42- 0.71)   |
| Puerto Rico                      | 9.19 (7.91- 10.88)      | 13.31 (11.65- 15.39)    | -18.63 (-36.21- 3.86)   | -0.91 (-1.17- -0.65) |
| Qatar                            | 0.19 (0.13- 0.26)       | 3.03 (2.15- 4.25)       | 104.18 (30.51- 224.82)  | 3.22 (2.72- 3.72)    |
| Romania                          | 74.4 (64.09- 87.87)     | 96.16 (84.38- 110.6)    | 13.45 (-10.6- 40.9)     | 0.07 (-0.16- 0.3)    |
| Russian Federation               | 676.87 (547.63- 889.74) | 843.15 (767.81- 935.57) | 4.19 (-18.78- 32.96)    | -0.3 (-0.76- 0.17)   |
| Rwanda                           | 11.16 (6.31- 20.94)     | 9.33 (6.01- 13.42)      | -49.8 (-69.57- -0.2)    | -4.19 (-4.8- -3.58)  |
| Saint Lucia                      | 0.29 (0.24- 0.36)       | 0.48 (0.42- 0.56)       | -30.7 (-47.21- -11.92)  | -1.89 (-2.26- -1.51) |
| Saint Vincent and the Grenadines | 0.18 (0.16- 0.22)       | 0.3 (0.26- 0.35)        | -11.5 (-29.67- 9.35)    | -0.73 (-0.99- -0.46) |
| Samoa                            | 0.21 (0.16- 0.26)       | 0.32 (0.25- 0.42)       | -11.89 (-30.81- 10.98)  | 0.2 (0.12- 0.27)     |

|                       |                         |                         |                         |                      |
|-----------------------|-------------------------|-------------------------|-------------------------|----------------------|
| Sao Tome and Principe | 0.1 (0.06- 0.15)        | 0.21 (0.17- 0.27)       | 21.24 (-18.81- 108.74)  | 0.11 (-0.13- 0.35)   |
| Saudi Arabia          | 4.22 (2.53- 6.33)       | 23.71 (15.1- 34.02)     | 85.13 (-10.64- 283.2)   | 2.74 (2.42- 3.07)    |
| Senegal               | 9.77 (5.7- 14.13)       | 20.16 (14.72- 27.7)     | 2.38 (-25.12- 47.07)    | -0.48 (-0.62- -0.35) |
| Serbia                | 33.84 (27.67- 42.65)    | 48.53 (40.47- 59.07)    | 20.37 (-7.2- 55.13)     | 0.7 (0.26- 1.14)     |
| Seychelles            | 0.17 (0.12- 0.24)       | 0.27 (0.21- 0.35)       | -25.06 (-46.06- -1.85)  | -1.12 (-1.22- -1.01) |
| Sierra Leone          | 4.28 (2.5- 6.55)        | 9.91 (6.69- 15.17)      | 31.55 (-11.81- 109.47)  | 0.91 (0.71- 1.1)     |
| Singapore             | 12.97 (8.29- 17.08)     | 20.38 (18.16- 22.93)    | -48.45 (-62.62- -15.15) | -2.34 (-2.58- -2.1)  |
| Slovakia              | 19.22 (15.58- 24.48)    | 20.51 (17.18- 24.18)    | -25.46 (-48.24- 1.79)   | -0.99 (-1.14- -0.83) |
| Slovenia              | 16.71 (13.69- 20)       | 37.1 (32- 43.08)        | 43.6 (10.18- 87.51)     | 2.11 (1.43- 2.8)     |
| Solomon Islands       | 0.6 (0.37- 1.05)        | 1.43 (1- 2.28)          | -0.66 (-24.84- 36.99)   | 0.59 (0.46- 0.72)    |
| Somalia               | 8.08 (3.3- 18.16)       | 16.28 (8.84- 29.24)     | -7.88 (-41.56- 62.15)   | -1.05 (-1.3- -0.81)  |
| South Africa          | 165.97 (143.04- 193.32) | 341.61 (305.14- 386.88) | 10.97 (-2.28- 27.17)    | -0.13 (-0.9- 0.64)   |
| South Korea           | 55.5 (43.78- 66.32)     | 137.63 (120.08- 163.18) | -3.04 (-25.19- 38.47)   | 0.84 (0.5- 1.18)     |
| South Sudan           | 3.38 (1.27- 7.85)       | 5.39 (2.71- 10.32)      | 4.97 (-30.55- 77.65)    | -0.49 (-0.74- -0.23) |
| Spain                 | 387.17 (317.24- 463.8)  | 556.64 (496.46- 626.75) | -13.48 (-31.86- 15.29)  | -0.39 (-0.48- -0.29) |
| Sri Lanka             | 57.18 (44.61- 77.14)    | 99.41 (77.14- 130.1)    | -11.95 (-43.77- 29.2)   | -0.92 (-1.29- -0.55) |
| Sudan                 | 9.47 (4.36- 18.82)      | 34.53 (22.33- 52.07)    | 99.08 (20.89- 237.64)   | 3.06 (2.77- 3.35)    |
| Suriname              | 0.76 (0.64- 0.9)        | 1.44 (1.23- 1.7)        | -5.82 (-26.4- 24.31)    | -0.65 (-0.88- -0.42) |
| Swaziland             | 2.89 (1.98- 4.07)       | 5.17 (3.96- 6.69)       | -4.94 (-35.96- 45.55)   | 0.14 (-0.37- 0.66)   |
| Sweden                | 178.13 (147.96- 210.78) | 180.6 (161.44- 205.9)   | -29.86 (-43.46- -9.38)  | -0.96 (-1.07- -0.85) |
| Switzerland           | 142.05 (114.21- 166.61) | 203.85 (175.71- 239.37) | -11.96 (-30.99- 21.57)  | 0.14 (-0.12- 0.4)    |
| Syria                 | 9.61 (5.97- 14.81)      | 22.85 (17.96- 29.16)    | -1.26 (-44.35- 72.47)   | -0.34 (-0.57- -0.1)  |
| Taiwan (China)        | 27.89 (22.01- 36.3)     | 56.04 (50.53- 63.44)    | -11.9 (-34.53- 14.48)   | -0.37 (-0.66- -0.08) |
| Tajikistan            | 11 (7.99- 14.5)         | 23.91 (19.65- 29.16)    | 20.99 (-13.29- 77.88)   | -0.04 (-0.29- 0.21)  |
| Tanzania              | 21.84 (11.88- 36.99)    | 40.85 (25.95- 57.52)    | -3.77 (-31.96- 41.49)   | -1.09 (-1.42- -0.77) |

|                      |                            |                            |                         |                      |
|----------------------|----------------------------|----------------------------|-------------------------|----------------------|
| Thailand             | 270.04 (218.05- 346.78)    | 320.4 (261.27- 403.06)     | -43.01 (-60.13- -20.83) | -3.26 (-3.84- -2.67) |
| The Bahamas          | 0.6 (0.5- 0.73)            | 1.17 (1.01- 1.41)          | -16.33 (-34.26- 4.61)   | -0.59 (-0.72- -0.45) |
| The Gambia           | 1.03 (0.6- 1.53)           | 2.29 (1.75- 3.13)          | -1.22 (-30.31- 64.68)   | -0.41 (-0.5- -0.33)  |
| Timor-Leste          | 0.8 (0.45- 1.42)           | 1.79 (1.16- 2.41)          | 18.48 (-30.69- 120.27)  | 0.45 (0.14- 0.77)    |
| Togo                 | 5.21 (3.26- 7.55)          | 9.88 (7.1- 13.95)          | -22.12 (-44.84- 19.92)  | -1.67 (-1.92- -1.41) |
| Tonga                | 0.11 (0.09- 0.14)          | 0.18 (0.15- 0.22)          | 0.8 (-22.21- 30.3)      | 0.66 (0.59- 0.74)    |
| Trinidad and Tobago  | 1.75 (1.54- 2.03)          | 3.21 (2.58- 3.98)          | -7.05 (-30.6- 22.34)    | -0.34 (-1.21- 0.54)  |
| Tunisia              | 3.17 (2.53- 4.17)          | 17.48 (11.7- 26.14)        | 147.26 (55.25- 271.82)  | 3.8 (3.34- 4.26)     |
| Turkey               | 779.43 (441.82- 1198.13)   | 814.36 (704.73- 959.32)    | -52.12 (-70.71- -15.18) | -3.25 (-3.72- -2.78) |
| Turkmenistan         | 3.23 (2.63- 3.92)          | 7.67 (6.47- 9.21)          | 29.75 (2.84- 60.94)     | 0.67 (0.22- 1.12)    |
| Uganda               | 10.86 (4.72- 19.47)        | 18.31 (11.41- 26.21)       | -9.9 (-40.9- 51.82)     | -1.25 (-1.49- -1.01) |
| Ukraine              | 208.34 (172.58- 258.56)    | 310.73 (274.67- 352)       | 53.53 (18.08- 97.02)    | 0.91 (0.51- 1.31)    |
| United Arab Emirates | 0.7 (0.38- 1.14)           | 17.56 (8.91- 31.6)         | 223.78 (92.37- 419.26)  | 5.01 (4.62- 5.4)     |
| United Kingdom       | 2662.81 (2068.21- 3128.76) | 3308.89 (3136.57- 3494.8)  | -11.37 (-26.58- 14.48)  | -0.42 (-0.48- -0.37) |
| United States        | 2451.43 (2196.81- 2645.88) | 3172.34 (3043.92- 3309.45) | -16.56 (-25.29- -5.32)  | -1.16 (-1.3- -1.03)  |
| Uruguay              | 9.44 (8.38- 10.7)          | 14.57 (12.73- 16.84)       | 13.81 (-8.1- 39.08)     | 0.99 (0.64- 1.35)    |
| Uzbekistan           | 20.19 (15.56- 27.65)       | 33.62 (28.2- 41.1)         | -7.98 (-35.17- 27.35)   | -1.29 (-1.98- -0.6)  |
| Vanuatu              | 0.29 (0.17- 0.44)          | 0.94 (0.57- 1.51)          | 37.42 (-5.79- 103.17)   | 1.4 (1.27- 1.53)     |
| Venezuela            | 21.24 (18.46- 24.9)        | 49.31 (40.99- 59.76)       | -22.93 (-40.56- -0.74)  | -1 (-1.29- -0.71)    |
| Vietnam              | 97.59 (72.99- 134.03)      | 221.47 (181.33- 277.32)    | 0.33 (-29.29- 45.59)    | 0.16 (0.03- 0.28)    |
| Virgin Islands, U.S. | 0.58 (0.51- 0.69)          | 1.29 (1.06- 1.55)          | 16.05 (-9.93- 44.93)    | 0.76 (0.59- 0.93)    |
| Yemen                | 8.02 (2.65- 19.16)         | 38.41 (20.39- 63.81)       | 101.76 (18.46- 328.41)  | 2.83 (2.51- 3.14)    |
| Zambia               | 9.12 (5.23- 16.01)         | 17.87 (13.1- 25.26)        | 4.33 (-29.57- 64.17)    | -1.37 (-1.97- -0.77) |
| Zimbabwe             | 5.03 (3.6- 7.81)           | 16.08 (12.74- 21.13)       | 92.62 (37.4- 165.99)    | 3.14 (1.93- 4.36)    |

CI: confidence interval; EAPC: estimated annual percentage change; UI: uncertainty interval.

**eTable 6.** Deaths and Age-Standardized Death Rates for Mesothelioma Among Countries and Territories in 1990 and 2017 and Temporal Trends From 1990 to 2017

| Location            | Death Cases No. (95% UI) |                         | All ages percent change (%) | EAPC No. (95% CI)    |
|---------------------|--------------------------|-------------------------|-----------------------------|----------------------|
|                     | 1990                     | 2017                    | 1990-2017                   | 1990-2017            |
| Afghanistan         | 31.59 (8.08- 81.27)      | 85.32 (32- 184.67)      | 133.77 (65.69- 383.31)      | 1.38 (0.93- 1.84)    |
| Albania             | 2.25 (1.49- 3.32)        | 5.27 (3.26- 9.11)       | 78.71 (32.88- 130.69)       | 1.4 (1.13- 1.68)     |
| Algeria             | 7.3 (5.35- 9.67)         | 41.99 (31.2- 57.93)     | 317.48 (180.53- 472.49)     | 3.99 (3.46- 4.51)    |
| American Samoa      | 0.07 (0.06- 0.08)        | 0.16 (0.14- 0.19)       | 64.18 (31.22- 101.54)       | 1.85 (1.43- 2.27)    |
| Andorra             | 1.24 (0.93- 1.52)        | 2.6 (1.92- 3.21)        | 3.91 (-23.84- 40.64)        | -0.22 (-0.31- -0.13) |
| Angola              | 9.43 (4.56- 17.27)       | 18.76 (12.89- 26.34)    | 94.01 (25.82- 228.28)       | -1.28 (-1.42- -1.13) |
| Antigua and Barbuda | 0.07 (0.07- 0.08)        | 0.09 (0.08- 0.1)        | -15.7 (-25.42- -6.28)       | -2.35 (-2.66- -2.04) |
| Argentina           | 81.61 (74.99- 89.97)     | 223.55 (199.55- 250.69) | 108.86 (80.52- 137.33)      | 2.77 (2.38- 3.16)    |
| Armenia             | 14.71 (12.36- 18.86)     | 21.57 (20.11- 23.14)    | 27.25 (-1.98- 52.57)        | -0.21 (-0.47- 0.04)  |
| Australia           | 413.61 (315.96- 478.63)  | 804.05 (710.63- 899.61) | 35.97 (13.17- 82.64)        | -0.12 (-0.25- 0.02)  |
| Austria             | 87.77 (67.04- 102.33)    | 116.6 (106.62- 128.01)  | 35.52 (11.53- 84.87)        | 0.07 (-0.19- 0.32)   |
| Azerbaijan          | 4.62 (3.97- 5.22)        | 9.68 (8.31- 11.09)      | 52.35 (28.19- 81.44)        | 0.38 (-0.11- 0.87)   |
| Bahrain             | 0.35 (0.29- 0.42)        | 2.7 (2.25- 3.24)        | 336.25 (225.51- 487.94)     | 3.22 (2.07- 4.38)    |
| Bangladesh          | 111.09 (65.83- 200.97)   | 122.58 (91.11- 174.69)  | 45.17 (4.05- 116.41)        | -2.95 (-3.08- -2.83) |
| Barbados            | 0.6 (0.52- 0.67)         | 0.84 (0.75- 0.93)       | 15.57 (-1.66- 38.18)        | -0.97 (-1.19- -0.74) |
| Belarus             | 17.97 (14.8- 22.88)      | 28.85 (25.16- 33.33)    | 46.39 (18.03- 75.72)        | 1.06 (0.34- 1.79)    |
| Belgium             | 179.83 (151.23- 202.2)   | 267.55 (241.11- 296.6)  | 42.8 (21.43- 81.76)         | 0.43 (0.27- 0.6)     |
| Belize              | 0.39 (0.33- 0.46)        | 1.4 (1.28- 1.53)        | 85.37 (53.43- 126.61)       | -0.21 (-0.75- 0.33)  |
| Benin               | 3.98 (2.42- 5.72)        | 8.27 (6.02- 11.29)      | 63.98 (15.56- 135)          | -0.66 (-0.84- -0.47) |
| Bermuda             | 0.62 (0.46- 0.71)        | 0.49 (0.45- 0.55)       | -30.36 (-43.33- -2.65)      | -3.43 (-3.62- -3.23) |
| Bhutan              | 0.47 (0.29- 0.8)         | 1 (0.73- 1.35)          | 150.82 (49.75- 335.07)      | -0.15 (-0.25- -0.05) |

|                          |                           |                            |                         |                      |
|--------------------------|---------------------------|----------------------------|-------------------------|----------------------|
| Bolivia                  | 21.83 (12.94- 33.62)      | 34.32 (27.17- 41.83)       | 49.56 (0.21- 135.81)    | -1.97 (-2.24- -1.7)  |
| Bosnia and Herzegovina   | 7.58 (5.97- 10.38)        | 8.19 (7.26- 9.3)           | -18.42 (-42.58- 6.81)   | -1.14 (-1.43- -0.84) |
| Botswana                 | 3.87 (2.63- 5.4)          | 6.84 (5.08- 9.75)          | 14.08 (-24.62- 59.75)   | -0.92 (-1.05- -0.78) |
| Brazil                   | 409.92 (369.54- 502.23)   | 853.15 (798.29- 893.43)    | 47.95 (18.76- 69.64)    | -0.32 (-0.57- -0.07) |
| Brunei                   | 0.42 (0.27- 0.59)         | 1.18 (1.07- 1.31)          | 60 (13.52- 148.55)      | 0.04 (-0.26- 0.35)   |
| Bulgaria                 | 8.82 (7.46- 10.36)        | 10.55 (9.66- 11.5)         | 14.45 (-6.37- 38.36)    | 0 (-0.37- 0.37)      |
| Burkina Faso             | 11.98 (6.25- 18.36)       | 15.45 (9.94- 23.75)        | 7.53 (-21.88- 55.32)    | -2.16 (-2.55- -1.77) |
| Burundi                  | 7.68 (4.4- 14.23)         | 6.04 (3.72- 9.73)          | -16.69 (-37.68- 32.8)   | -3.83 (-4.23- -3.43) |
| Cambodia                 | 14.24 (8.27- 25.15)       | 27.19 (21.75- 36.66)       | 111.26 (43.34- 231.37)  | -0.84 (-0.92- -0.75) |
| Cameroon                 | 13.98 (9.38- 18.92)       | 28.09 (21.66- 37.32)       | 24.59 (-9.82- 95.85)    | -1.35 (-1.69- -1)    |
| Canada                   | 383.95 (308.76- 442.3)    | 639.69 (583.6- 699.33)     | 14.83 (-3.34- 48.28)    | -0.82 (-0.87- -0.77) |
| Cape Verde               | 0.14 (0.1- 0.18)          | 0.33 (0.29- 0.37)          | 92.87 (33.58- 174.22)   | 0.15 (-0.04- 0.35)   |
| Central African Republic | 3.34 (1.76- 6.41)         | 5.33 (3.29- 9.05)          | 11.92 (-15.66- 68.72)   | -0.57 (-0.7- -0.44)  |
| Chad                     | 5.89 (2.72- 9.03)         | 8.38 (5.07- 13.25)         | -2.11 (-29.79- 45.81)   | -1.37 (-1.5- -1.24)  |
| Chile                    | 38.1 (31.33- 44.3)        | 63.54 (55.69- 72.46)       | 16.91 (-5.88- 50.37)    | -0.86 (-1.01- -0.7)  |
| China                    | 1166.11 (910.56- 1536.04) | 2780.02 (2556.75- 2950.74) | 85.74 (32.65- 145.79)   | 1.08 (0.63- 1.53)    |
| Colombia                 | 45.11 (37.94- 51.3)       | 104.59 (89.97- 120.12)     | 67.3 (35.38- 117.75)    | -0.82 (-1.02- -0.62) |
| Comoros                  | 0.38 (0.22- 0.65)         | 0.65 (0.45- 0.95)          | 91.97 (31.94- 201.13)   | -1.04 (-1.29- -0.8)  |
| Congo                    | 4.41 (2.6- 7.02)          | 7.24 (5.48- 9.92)          | 30.38 (-10.74- 96.89)   | -1.74 (-2.04- -1.44) |
| Costa Rica               | 3.02 (2.78- 3.31)         | 7.14 (6.45- 7.84)          | 16.4 (2.28- 31.34)      | -1.18 (-1.66- -0.7)  |
| Cote d'Ivoire            | 12.21 (7.57- 17.24)       | 25.38 (18.28- 34.22)       | 57.75 (13.52- 135.73)   | -1.07 (-1.39- -0.75) |
| Croatia                  | 19.34 (16.47- 21.66)      | 68.01 (62.05- 74.76)       | 258.87 (206.61- 344.98) | 5.74 (4.67- 6.83)    |
| Cuba                     | 15.52 (12.8- 17.83)       | 20.56 (18.07- 23.42)       | -5.86 (-20.31- 11.55)   | -1.03 (-1.32- -0.74) |
| Cyprus                   | 9.43 (7.09- 12.51)        | 13.28 (11.51- 15.51)       | -1.21 (-30.88- 41.73)   | -1.84 (-2.17- -1.52) |
| Czech Republic           | 40.89 (34.07- 48.46)      | 49.22 (44.71- 54.17)       | 40.48 (12.91- 78.02)    | -0.41 (-0.56- -0.27) |

|                                  |                          |                            |                         |                      |
|----------------------------------|--------------------------|----------------------------|-------------------------|----------------------|
| Democratic Republic of the Congo | 26.99 (16.68- 44.27)     | 50.64 (34.67- 75.93)       | 48.14 (15.68- 100.94)   | -0.6 (-0.81- -0.39)  |
| Denmark                          | 86.12 (77.17- 94.53)     | 133.29 (119.58- 149.49)    | 71.55 (49.07- 104.82)   | 0.43 (0.33- 0.53)    |
| Djibouti                         | 0.23 (0.13- 0.4)         | 0.82 (0.56- 1.29)          | 117.87 (50.37- 238.46)  | -0.06 (-0.22- 0.09)  |
| Dominica                         | 0.15 (0.13- 0.18)        | 0.28 (0.25- 0.31)          | 56.13 (28.82- 91.73)    | 1.1 (1.01- 1.2)      |
| Dominican Republic               | 3.53 (3.09- 4.06)        | 8.93 (7.49- 10.54)         | 47.87 (23.13- 81.43)    | 0.31 (-0.14- 0.77)   |
| Ecuador                          | 9.43 (7.78- 10.75)       | 27.91 (24.8- 31.03)        | 73.69 (42.56- 122.57)   | 1.02 (0.55- 1.5)     |
| Egypt                            | 25.72 (13.46- 42.12)     | 128.76 (62.99- 194.78)     | 326.77 (243.22- 471.21) | 4.28 (3.71- 4.85)    |
| El Salvador                      | 4.3 (3.73- 5.1)          | 7.57 (6.09- 9.24)          | 39.65 (8.22- 74.82)     | -0.32 (-0.52- -0.13) |
| Equatorial Guinea                | 0.57 (0.3- 1.14)         | 0.61 (0.39- 0.97)          | 9.59 (-44.51- 92.87)    | -3.26 (-3.67- -2.84) |
| Eritrea                          | 3.32 (1.87- 6.11)        | 6.18 (4.22- 8.47)          | 238.83 (119.77- 457.08) | -0.83 (-0.9- -0.76)  |
| Estonia                          | 2.64 (2.37- 3)           | 5.03 (4.29- 5.87)          | 140.49 (93.29- 189.79)  | 1.56 (1.12- 2)       |
| Ethiopia                         | 67.4 (33.3- 133.04)      | 53.27 (30.12- 77.36)       | 24.3 (-25.76- 163.88)   | -3.63 (-3.94- -3.32) |
| Federated States of Micronesia   | 0.16 (0.12- 0.23)        | 0.27 (0.19- 0.35)          | 73.24 (26.45- 122.61)   | 0.81 (0.76- 0.87)    |
| Fiji                             | 0.76 (0.63- 0.9)         | 2.2 (1.81- 2.64)           | 70.13 (34.93- 113.12)   | 1.89 (1.43- 2.36)    |
| Finland                          | 68.54 (55.28- 77.23)     | 99.79 (89.7- 111.27)       | 31.83 (10.7- 73.46)     | -0.34 (-0.51- -0.18) |
| France                           | 939.18 (791.88- 1067.68) | 1673.69 (1520.91- 1860.47) | 62.05 (34.24- 105.96)   | 0.61 (0.28- 0.94)    |
| Gabon                            | 1.43 (0.87- 2.11)        | 2.13 (1.75- 3.34)          | 34.97 (-10.72- 114.2)   | -1.03 (-1.5- -0.56)  |
| Georgia                          | 5.32 (4.26- 6.19)        | 22.59 (20.86- 24.3)        | 344.28 (277.59- 446.89) | 7.58 (6.29- 8.89)    |
| Germany                          | 1168.13 (952.78- 1317.6) | 1681.66 (1503.75- 1898.32) | 39.43 (19.82- 74.42)    | 0.04 (-0.08- 0.17)   |
| Ghana                            | 22.33 (18.41- 26.94)     | 29.36 (22.96- 35.91)       | -5.64 (-31.09- 25.07)   | -3.31 (-3.89- -2.73) |
| Greece                           | 52.33 (41.77- 63.89)     | 77.99 (71.31- 85.24)       | 8.71 (-12.05- 39.61)    | -0.1 (-0.19- -0.01)  |
| Greenland                        | 0.35 (0.24- 0.45)        | 0.68 (0.6- 0.77)           | 88.71 (36.84- 187.26)   | 0.41 (-0.15- 0.97)   |
| Grenada                          | 0.31 (0.27- 0.39)        | 0.35 (0.32- 0.38)          | -26.43 (-42.26- -12.67) | -1.84 (-2.36- -1.31) |
| Guam                             | 0.15 (0.12- 0.18)        | 0.49 (0.42- 0.57)          | 46.35 (15.15- 88.36)    | 2.17 (1.56- 2.78)    |
| Guatemala                        | 6.04 (4.91- 8.02)        | 13.63 (12.16- 15.22)       | 73.75 (26.13- 120.5)    | -1.28 (-1.54- -1.02) |

|               |                           |                            |                         |                      |
|---------------|---------------------------|----------------------------|-------------------------|----------------------|
| Guinea        | 8.36 (4.15- 12.51)        | 12.76 (8.86- 18.89)        | 55.39 (6.02- 159.21)    | -0.3 (-0.49- -0.1)   |
| Guinea-Bissau | 1.93 (1.04- 3.21)         | 2.48 (1.59- 3.86)          | 43.68 (1- 133.82)       | -1.42 (-1.58- -1.27) |
| Guyana        | 1.45 (1.28- 1.65)         | 1.98 (1.73- 2.24)          | 30.11 (9.55- 54.29)     | -0.54 (-1.02- -0.06) |
| Haiti         | 16.62 (8.44- 29.35)       | 24.51 (16.91- 37.48)       | 37.04 (3.27- 123.24)    | -0.94 (-1.14- -0.74) |
| Honduras      | 4.3 (3.11- 6.14)          | 16.31 (11.84- 23.45)       | 133.16 (59.19- 245.19)  | 1.4 (1.18- 1.61)     |
| Hungary       | 32.69 (29.08- 37.35)      | 37.01 (34.22- 40.22)       | 34.7 (14.62- 55.77)     | -0.36 (-0.57- -0.16) |
| Iceland       | 2.1 (1.84- 2.34)          | 4.67 (4.25- 5.1)           | 76.85 (52.23- 112.44)   | 0.43 (0.11- 0.74)    |
| India         | 843.67 (549.01- 1441.66)  | 2422.43 (2063.88- 3045.47) | 142.9 (74.88- 226.49)   | 1.01 (0.81- 1.21)    |
| Indonesia     | 160.27 (115.57- 219.85)   | 412.73 (367.17- 461.51)    | 111.13 (65.05- 175.15)  | 1.28 (1.02- 1.53)    |
| Iran          | 70.35 (56.25- 96.33)      | 493.64 (448.65- 530.99)    | 490.01 (301.58- 676.41) | 5.38 (4.5- 6.27)     |
| Iraq          | 23.55 (16.3- 32.84)       | 39.24 (35.23- 43.71)       | 27.94 (-12.58- 88.84)   | -2.6 (-3.4- -1.8)    |
| Ireland       | 38.8 (25.86- 47.77)       | 43 (38.41- 48.33)          | 12.61 (-12.8- 80.49)    | -1.73 (-1.88- -1.59) |
| Israel        | 26.71 (23.85- 29.55)      | 41.93 (38.03- 47.01)       | -0.14 (-14.25- 20.68)   | -1.64 (-1.85- -1.42) |
| Italy         | 1253.29 (929.57- 1479.14) | 1714.2 (1556.85- 1900.52)  | 18.98 (-3.25- 68.37)    | -0.51 (-0.61- -0.4)  |
| Jamaica       | 3.19 (2.77- 3.66)         | 5.08 (3.87- 6.28)          | 3.75 (-22.14- 36.21)    | -1.53 (-2.39- -0.67) |
| Japan         | 579.24 (516.81- 617.29)   | 1555.82 (1477.79- 1665.87) | 60.3 (45.2- 88.14)      | 1.43 (1.19- 1.66)    |
| Jordan        | 4.33 (2.84- 5.99)         | 11.54 (9.34- 13.74)        | 54.06 (-1.33- 150.93)   | -1.75 (-2.12- -1.38) |
| Kazakhstan    | 31.73 (27.88- 37.51)      | 41.89 (38.43- 45.77)       | 26.99 (2.67- 47.31)     | -0.35 (-1.07- 0.38)  |
| Kenya         | 10.39 (6.78- 14.35)       | 29.52 (22.83- 43.58)       | 82.49 (49.69- 131.07)   | 0.07 (-0.31- 0.44)   |
| Kiribati      | 0.05 (0.04- 0.06)         | 0.11 (0.09- 0.14)          | 81.89 (42.45- 142.8)    | 1.42 (1.23- 1.61)    |
| Kuwait        | 0.9 (0.83- 0.97)          | 5.72 (4.79- 7.09)          | 334.17 (265.22- 440.37) | 3.07 (1.87- 4.28)    |
| Kyrgyzstan    | 2.2 (1.94- 2.49)          | 4.63 (4.11- 5.4)           | 128.82 (90.52- 182.65)  | 1.72 (1.37- 2.06)    |
| Laos          | 6.57 (3.2- 11.97)         | 8.84 (6.62- 11.97)         | 75.35 (13.66- 224.96)   | -1.71 (-1.82- -1.6)  |
| Latvia        | 6.98 (6.25- 7.92)         | 8.97 (7.85- 10.33)         | 56.07 (29.01- 83.14)    | 0.42 (-0.08- 0.91)   |
| Lebanon       | 2.12 (1.42- 2.79)         | 6.45 (4.64- 9.5)           | 101.99 (25.74- 194.22)  | 0.96 (0.74- 1.18)    |



|                  |                         |                         |                         |                      |
|------------------|-------------------------|-------------------------|-------------------------|----------------------|
| Lesotho          | 9.56 (6.35- 13.33)      | 14.58 (11.37- 19.21)    | 4 (-27.94- 50.25)       | 1.13 (0.78- 1.47)    |
| Liberia          | 1.96 (1.15- 2.9)        | 3.14 (2.2- 4.64)        | 102.2 (44.85- 202.51)   | -0.66 (-0.95- -0.37) |
| Libya            | 1.77 (1.19- 2.42)       | 13.84 (8.12- 22.92)     | 322.31 (185.94- 523.2)  | 5.13 (4.75- 5.5)     |
| Lithuania        | 12.87 (11.48- 14.58)    | 10.28 (9.42- 11.19)     | -23.12 (-34.66- -12.34) | -2.19 (-2.68- -1.69) |
| Luxembourg       | 5.5 (4.37- 6.24)        | 8.35 (7.18- 9.9)        | 31.92 (7.63- 88.57)     | -0.36 (-0.49- -0.22) |
| Macedonia        | 1.49 (1.21- 1.86)       | 1.7 (1.47- 1.93)        | -13.6 (-37.04- 15.23)   | -1.97 (-2.37- -1.56) |
| Madagascar       | 7.2 (4.33- 12.56)       | 11.45 (6.99- 18.92)     | 28.58 (3.1- 66.95)      | -1.01 (-1.12- -0.9)  |
| Malawi           | 5.23 (2.37- 9.75)       | 8.65 (5.42- 12.61)      | 119.7 (52.12- 309.33)   | -1.16 (-1.63- -0.68) |
| Malaysia         | 15.03 (12.96- 18.46)    | 43.82 (37.3- 51.55)     | 49.7 (13.94- 87.38)     | 0.75 (0.62- 0.89)    |
| Maldives         | 1.04 (0.5- 1.78)        | 1.3 (1.11- 1.54)        | 42.37 (-26.09- 230.81)  | -3.83 (-4.07- -3.59) |
| Mali             | 11.78 (6.03- 19.16)     | 10.89 (6.57- 16.35)     | -17.24 (-37.47- 19.79)  | -3.19 (-3.61- -2.77) |
| Malta            | 4.02 (3.41- 4.53)       | 9.33 (8.46- 10.21)      | 56.26 (34.21- 89.99)    | 0.52 (0.35- 0.69)    |
| Marshall Islands | 0.05 (0.03- 0.08)       | 0.13 (0.09- 0.18)       | 89.74 (44.3- 147.8)     | 1.23 (0.94- 1.51)    |
| Mauritania       | 3.31 (2.21- 4.55)       | 3.27 (2.66- 3.94)       | 10.35 (-19.91- 60.78)   | -2.91 (-3.25- -2.57) |
| Mauritius        | 0.94 (0.8- 1.13)        | 1.46 (1.33- 1.6)        | 2.75 (-18.3- 24.33)     | -0.69 (-1.08- -0.3)  |
| Mexico           | 125.43 (110.59- 143.23) | 379.99 (366.63- 393.93) | 83.96 (57.37- 110.59)   | 1.15 (0.93- 1.38)    |
| Moldova          | 5.15 (4.52- 6.05)       | 5.59 (5.06- 6.14)       | 13.62 (-4.26- 31.66)    | -0.96 (-1.5- -0.43)  |
| Mongolia         | 3.3 (2.45- 4.15)        | 3.01 (2.55- 3.58)       | -15.72 (-38.44- 21.08)  | -4.98 (-5.69- -4.27) |
| Montenegro       | 0.79 (0.72- 0.88)       | 1.48 (1.25- 1.69)       | 25.63 (4.23- 46.5)      | 0.66 (0.31- 1.01)    |
| Morocco          | 10.35 (5.94- 16.76)     | 51.82 (35.21- 71.62)    | 319.24 (200.44- 490.67) | 4.19 (3.8- 4.59)     |
| Mozambique       | 10.77 (5.54- 19.81)     | 16.96 (11.38- 27.32)    | 45.03 (7.62- 121.8)     | -0.46 (-0.74- -0.18) |
| Myanmar          | 239.11 (97.43- 471.53)  | 207.33 (154.85- 266.2)  | 2.55 (-39.68- 106.92)   | -2.74 (-2.97- -2.51) |
| Namibia          | 7.32 (5.17- 9.8)        | 10.08 (8.1- 12.93)      | 0.83 (-29.74- 36.88)    | -1.83 (-2.34- -1.32) |
| Nepal            | 16.24 (8.57- 30.88)     | 34.87 (24.23- 49.08)    | 152.48 (69.65- 325.2)   | 0.18 (-0.19- 0.55)   |
| Netherlands      | 390.35 (342.98- 432.65) | 617.89 (569.46- 676.17) | 33.54 (16.73- 55.77)    | -0.23 (-0.37- -0.08) |

|                                  |                         |                         |                         |                      |
|----------------------------------|-------------------------|-------------------------|-------------------------|----------------------|
| New Zealand                      | 64.6 (44.07- 76.96)     | 96.61 (86.65- 107.42)   | 22.49 (-2.56- 89.13)    | -0.72 (-0.95- -0.49) |
| Nicaragua                        | 1.22 (1.01- 1.49)       | 4.02 (3.41- 4.71)       | 176.68 (106.41- 252.08) | 0.75 (0.56- 0.93)    |
| Niger                            | 5.79 (2.79- 9.19)       | 8.4 (4.8- 13.66)        | 40.06 (4.95- 94.26)     | -2.64 (-3.01- -2.27) |
| Nigeria                          | 68.17 (46.7- 92.32)     | 79.55 (52.97- 114.57)   | -3.01 (-36.05- 41.74)   | -2.44 (-2.69- -2.19) |
| North Korea                      | 17.87 (12.95- 24.09)    | 54.14 (41.97- 71.82)    | 60.9 (33.3- 95.97)      | 2.36 (2.06- 2.65)    |
| Northern Mariana Islands         | 0.02 (0.02- 0.03)       | 0.06 (0.05- 0.07)       | 29.68 (6.54- 63.24)     | 0.66 (0.25- 1.07)    |
| Norway                           | 62.59 (54.33- 68.65)    | 75.62 (70.3- 82.85)     | 32.2 (13.18- 65.37)     | -0.12 (-0.38- 0.14)  |
| Oman                             | 1.64 (1.09- 2.61)       | 7.53 (5.45- 9.93)       | 252.9 (90.41- 472.25)   | 2.96 (2.51- 3.4)     |
| Pakistan                         | 62.11 (40.3- 96.16)     | 175.39 (133.79- 230.15) | 128.12 (70.72- 218.55)  | 0.96 (0.62- 1.3)     |
| Palestine                        | 0.79 (0.53- 1.19)       | 1.84 (1.6- 2.1)         | 72.32 (7.62- 170.68)    | -1.24 (-1.44- -1.03) |
| Panama                           | 2.19 (1.93- 2.45)       | 5.52 (5- 6.07)          | 34 (13.95- 56.79)       | 0.07 (-0.13- 0.28)   |
| Papua New Guinea                 | 6.11 (3.57- 10.95)      | 16.42 (10.71- 27.67)    | 44.04 (19.35- 81.09)    | 0.83 (0.66- 1)       |
| Paraguay                         | 3.31 (2.86- 3.79)       | 10.86 (8.99- 13.01)     | 80.06 (45.47- 118.49)   | 1.22 (1.1- 1.34)     |
| Peru                             | 103.52 (84.79- 125.63)  | 59.17 (49.22- 69.86)    | -44.55 (-57.76- -30.89) | -8.2 (-9.49- -6.89)  |
| Philippines                      | 63.05 (57.21- 69.66)    | 137.33 (118.06- 158.2)  | 26.1 (9.62- 43.78)      | -0.17 (-0.32- -0.02) |
| Poland                           | 83.56 (70.78- 100.58)   | 291.96 (266.05- 318.51) | 244.3 (172.84- 325.48)  | 4.24 (3.7- 4.79)     |
| Portugal                         | 39.16 (30.7- 47.89)     | 68.73 (61.53- 76.6)     | 56.19 (20.74- 114.99)   | 0.13 (-0.43- 0.7)    |
| Puerto Rico                      | 7.85 (6.9- 8.82)        | 11.8 (10.54- 13.16)     | 12.43 (-7.28- 36.66)    | -1.02 (-1.3- -0.74)  |
| Qatar                            | 0.13 (0.1- 0.18)        | 2.15 (1.63- 2.82)       | 425.14 (247.02- 718.81) | 3.09 (2.59- 3.59)    |
| Romania                          | 50.01 (45.1- 56.24)     | 70.69 (64.84- 76.98)    | 34.44 (14.92- 53.15)    | 0.3 (0.09- 0.52)     |
| Russian Federation               | 463.07 (395.34- 590.07) | 610.81 (583.97- 640.46) | 17.72 (-5.3- 38.04)     | -0.14 (-0.56- 0.27)  |
| Rwanda                           | 8.03 (4.76- 14.54)      | 7.2 (4.61- 10.2)        | 48.24 (-7.35- 194.27)   | -3.8 (-4.36- -3.23)  |
| Saint Lucia                      | 0.21 (0.17- 0.25)       | 0.36 (0.33- 0.39)       | 14.76 (-6.58- 38.64)    | -1.86 (-2.23- -1.49) |
| Saint Vincent and the Grenadines | 0.14 (0.12- 0.16)       | 0.23 (0.21- 0.26)       | 18.6 (0.58- 37.43)      | -0.65 (-0.91- -0.39) |
| Samoa                            | 0.16 (0.13- 0.2)        | 0.26 (0.2- 0.33)        | 14.26 (-4.97- 37.37)    | 0.23 (0.17- 0.29)    |

|                       |                         |                         |                         |                      |
|-----------------------|-------------------------|-------------------------|-------------------------|----------------------|
| Sao Tome and Principe | 0.07 (0.05- 0.11)       | 0.15 (0.12- 0.18)       | 107.29 (44.81- 250.24)  | 0.26 (0.07- 0.46)    |
| Saudi Arabia          | 3.16 (1.95- 4.64)       | 16.93 (11.17- 22.39)    | 359.71 (120.81- 797.61) | 2.82 (2.48- 3.16)    |
| Senegal               | 7.15 (4.23- 10.08)      | 14.74 (10.82- 19.37)    | 104.13 (57.04- 186.85)  | -0.44 (-0.58- -0.31) |
| Serbia                | 22.44 (18.89- 27.03)    | 35.28 (30.64- 39.65)    | 22.84 (1.45- 48.54)     | 0.96 (0.55- 1.37)    |
| Seychelles            | 0.13 (0.1- 0.18)        | 0.21 (0.16- 0.25)       | 10.66 (-16.38- 37.32)   | -1.12 (-1.23- -1.01) |
| Sierra Leone          | 3.11 (1.87- 4.65)       | 6.92 (4.91- 10.17)      | 122.03 (46.66- 237.47)  | 0.93 (0.78- 1.07)    |
| Singapore             | 11.86 (7.69- 15.38)     | 19.36 (17.36- 21.54)    | 12.53 (-16.86- 82.38)   | -2.32 (-2.56- -2.08) |
| Slovakia              | 13.15 (10.96- 15.84)    | 14.9 (12.96- 16.95)     | 18.42 (-9.65- 52.28)    | -0.78 (-0.93- -0.63) |
| Slovenia              | 12 (10.09- 13.78)       | 29.35 (26.14- 32.99)    | 124.5 (83.91- 185.12)   | 2.43 (1.77- 3.09)    |
| Solomon Islands       | 0.44 (0.28- 0.74)       | 1.05 (0.75- 1.62)       | 47.85 (19.25- 90.22)    | 0.65 (0.52- 0.77)    |
| Somalia               | 5.57 (2.38- 11.73)      | 11.74 (6.35- 20.19)     | 70.91 (18.54- 207.74)   | -0.88 (-1.11- -0.65) |
| South Africa          | 133.97 (115.84- 156.56) | 289.37 (258.27- 324.48) | 27.29 (12.7- 45.32)     | 0.04 (-0.71- 0.8)    |
| South Korea           | 44.31 (35.97- 51.56)    | 125.14 (110.28- 147.17) | 123.7 (74.01- 213.61)   | 1.01 (0.7- 1.33)     |
| South Sudan           | 2.45 (0.97- 5.32)       | 3.91 (2- 7.18)          | 36.16 (-6.42- 133.92)   | -0.41 (-0.66- -0.16) |
| Spain                 | 313.18 (266.38- 360.04) | 491.42 (451.29- 538.32) | 24.92 (4.29- 56.09)     | -0.16 (-0.25- -0.08) |
| Sri Lanka             | 43.47 (35.22- 56.17)    | 79.07 (61.99- 96.41)    | 51.96 (2.35- 104.88)    | -0.93 (-1.31- -0.55) |
| Sudan                 | 6.64 (3.28- 12.94)      | 26.08 (17.24- 38.98)    | 354.62 (192.23- 645.67) | 3.48 (3.17- 3.79)    |
| Suriname              | 0.53 (0.46- 0.6)        | 1.05 (0.93- 1.17)       | 22.98 (5.23- 45.49)     | -0.57 (-0.8- -0.34)  |
| Swaziland             | 2.43 (1.71- 3.3)        | 4.28 (3.39- 5.22)       | 5.04 (-24.93- 49.3)     | -0.01 (-0.5- 0.49)   |
| Sweden                | 154.7 (131.56- 176.05)  | 164.75 (152.15- 178.85) | 9.37 (-7.08- 32.98)     | -0.76 (-0.88- -0.64) |
| Switzerland           | 120.05 (99.82- 134.52)  | 183.29 (164.17- 208.07) | 47.96 (24.77- 95.93)    | 0.37 (0.12- 0.62)    |
| Syria                 | 6.97 (4.53- 10.49)      | 17.5 (14.13- 21.78)     | 38.68 (-16.95- 132.98)  | -0.17 (-0.41- 0.07)  |
| Taiwan (China)        | 21.72 (17.53- 28.41)    | 47.05 (43.7- 50.64)     | 25.96 (-5.34- 57.98)    | -0.32 (-0.62- -0.01) |
| Tajikistan            | 5.81 (4.47- 6.98)       | 13.13 (11.79- 14.67)    | 84.6 (47.69- 146.4)     | 0.17 (-0.08- 0.42)   |
| Tanzania              | 15.95 (8.89- 26.21)     | 31.15 (19.78- 44.13)    | 87.5 (33.67- 169.96)    | -0.87 (-1.17- -0.57) |

|                      |                            |                            |                         |                      |
|----------------------|----------------------------|----------------------------|-------------------------|----------------------|
| Thailand             | 192.31 (162.61- 237.76)    | 241.44 (208.94- 278.77)    | -15.11 (-36.09- 4.29)   | -3.27 (-3.78- -2.77) |
| The Bahamas          | 0.44 (0.38- 0.5)           | 0.87 (0.79- 0.97)          | 9.58 (-5.93- 28.96)     | -0.66 (-0.8- -0.53)  |
| The Gambia           | 0.72 (0.43- 1.04)          | 1.68 (1.33- 2.21)          | 58.52 (14.25- 150.16)   | -0.33 (-0.42- -0.25) |
| Timor-Leste          | 0.53 (0.32- 0.89)          | 1.37 (0.96- 1.84)          | 175.02 (64.52- 400.1)   | 0.65 (0.35- 0.95)    |
| Togo                 | 3.47 (2.24- 4.81)          | 6.87 (5.27- 9.37)          | 53.01 (12.14- 124.2)    | -1.44 (-1.68- -1.2)  |
| Tonga                | 0.09 (0.08- 0.11)          | 0.15 (0.12- 0.18)          | 29.52 (4.89- 58.74)     | 0.66 (0.57- 0.75)    |
| Trinidad and Tobago  | 1.4 (1.26- 1.58)           | 2.56 (2.08- 3.1)           | 32.83 (12.37- 56.5)     | -0.47 (-1.35- 0.43)  |
| Tunisia              | 2.22 (1.78- 2.96)          | 14.09 (9.35- 21.47)        | 322.63 (187.97- 505.27) | 4.11 (3.64- 4.58)    |
| Turkey               | 564.15 (332.06- 861.23)    | 661.15 (588.06- 748.33)    | 7.84 (-32.18- 82.11)    | -2.88 (-3.35- -2.42) |
| Turkmenistan         | 2.09 (1.8- 2.44)           | 5.1 (4.53- 5.65)           | 97 (65.64- 125.81)      | 0.83 (0.39- 1.27)    |
| Uganda               | 7.88 (3.52- 13.72)         | 13.96 (8.76- 19.85)        | 125.64 (51.71- 269.47)  | -0.96 (-1.19- -0.74) |
| Ukraine              | 142.81 (120.14- 172.65)    | 214.47 (199.76- 229.24)    | 37.55 (11.62- 67.14)    | 0.89 (0.5- 1.27)     |
| United Arab Emirates | 0.47 (0.25- 0.76)          | 12.11 (6.08- 21.34)        | 396.54 (237.69- 637.75) | 5.15 (4.72- 5.58)    |
| United Kingdom       | 2137.06 (1676.43- 2508.33) | 2802.57 (2708.68- 2911.49) | 39.27 (15.96- 78.35)    | -0.14 (-0.22- -0.07) |
| United States        | 2389.62 (2137.49- 2580.57) | 3147.07 (3024.33- 3280.45) | -1.37 (-11.7- 12.1)     | -1.07 (-1.21- -0.94) |
| Uruguay              | 8.35 (7.53- 9.19)          | 13.12 (11.65- 14.72)       | 40.97 (22.6- 60.69)     | 0.89 (0.54- 1.24)    |
| Uzbekistan           | 12.68 (10.17- 17.11)       | 21.49 (18.75- 24.33)       | 6.21 (-20.05- 35.81)    | -1.07 (-1.72- -0.42) |
| Vanuatu              | 0.22 (0.13- 0.32)          | 0.73 (0.45- 1.17)          | 67.89 (28.76- 120.67)   | 1.49 (1.36- 1.62)    |
| Venezuela            | 16.01 (14.26- 18.3)        | 37.81 (32.37- 44.25)       | 24.59 (3.06- 45.21)     | -1.06 (-1.36- -0.76) |
| Vietnam              | 73.67 (55.27- 96.53)       | 173.67 (147.88- 206.5)     | 68.38 (26.72- 124.72)   | 0.22 (0.08- 0.37)    |
| Virgin Islands, U.S. | 0.45 (0.4- 0.51)           | 1.08 (0.88- 1.24)          | 26.14 (10.17- 41.78)    | 0.79 (0.61- 0.98)    |
| Yemen                | 5.28 (1.89- 12.26)         | 27.16 (15.38- 45.34)       | 368.79 (200.7- 851.9)   | 3.26 (2.93- 3.59)    |
| Zambia               | 6.26 (3.73- 10.71)         | 13.26 (9.72- 17.96)        | 105.83 (44.47- 215.65)  | -0.98 (-1.57- -0.39) |
| Zimbabwe             | 3.87 (2.87- 5.82)          | 12.21 (9.9- 15.25)         | 118.98 (59.45- 203.2)   | 2.99 (1.82- 4.18)    |

ASDR: age-standardized death rate; CI: confidence interval; EAPC: estimated annual percentage change; UI: uncertainty interval.

**eTable 7.** DALYs and Age-Standardized DALY Rates for Mesothelioma Among Countries and Territories in 1990 and 2017 and Temporal Trends From 1990 to 2017

| Location            | DALY Cases No. (95% UI)    |                               | All ages percent change (%) | EAPC No. (95% CI)    |
|---------------------|----------------------------|-------------------------------|-----------------------------|----------------------|
|                     | 1990                       | 2017                          | 1990-2017                   | 1990-2017            |
| Afghanistan         | 1131.03 (250.12- 3086.77)  | 3503.26 (1133.62- 8007.6)     | 138.02 (62.08- 440.67)      | 1.09 (0.61- 1.57)    |
| Albania             | 68.72 (44.6- 103.55)       | 133.17 (80.08- 237.6)         | 137.77 (69.49- 214.73)      | 1.25 (0.98- 1.51)    |
| Algeria             | 249.84 (177.56- 330.19)    | 1227.33 (925.03- 1675.52)     | 344.3 (193.68- 531.79)      | 3.49 (2.99- 3.99)    |
| American Samoa      | 2.08 (1.79- 2.43)          | 4.85 (4.18- 5.56)             | 87.01 (48.01- 130.34)       | 1.84 (1.43- 2.26)    |
| Andorra             | 26.36 (19.71- 32.69)       | 50.24 (36.43- 61.87)          | 22.63 (-10.58- 68.75)       | -0.43 (-0.5- -0.36)  |
| Angola              | 323.51 (150.88- 608.19)    | 613.91 (419.76- 881.4)        | 95.39 (23.39- 250.37)       | -1.6 (-1.76- -1.43)  |
| Antigua and Barbuda | 2.02 (1.86- 2.19)          | 2.5 (2.26- 2.73)              | -14.56 (-25.36- -4.04)      | -2.5 (-2.84- -2.16)  |
| Argentina           | 2180.64 (2001.61- 2391.34) | 5344.75 (4741.17- 6013.8)     | 113.41 (82.87- 144.84)      | 2.43 (2.07- 2.79)    |
| Armenia             | 424.5 (346.54- 550.98)     | 524.86 (487.09- 566.75)       | 58.17 (20.12- 94.66)        | -0.38 (-0.64- -0.11) |
| Australia           | 8746.02 (6638.4- 10082.03) | 13858.23 (12226.44- 15603.39) | 22.24 (0.93- 66.04)         | -0.79 (-0.91- -0.68) |
| Austria             | 1884.81 (1434.09- 2199.6)  | 2290.22 (2091.31- 2531.65)    | 26.28 (2.96- 73.62)         | -0.19 (-0.43- 0.05)  |
| Azerbaijan          | 143.22 (125.98- 158.36)    | 291.25 (248.21- 334.26)       | 91.7 (57.73- 126.54)        | 0.3 (-0.14- 0.74)    |
| Bahrain             | 9.72 (8.15- 11.54)         | 69.93 (57.96- 84.32)          | 230.88 (145.92- 350.27)     | 2.89 (1.84- 3.94)    |
| Bangladesh          | 3418.21 (1970.89- 6265.25) | 3479.76 (2487.87- 4920.8)     | 81.04 (23.87- 195.15)       | -2.98 (-3.09- -2.86) |
| Barbados            | 15.96 (14.27- 17.76)       | 21.71 (19.41- 24.24)          | 16.75 (-0.82- 37.61)        | -1.04 (-1.24- -0.84) |
| Belarus             | 481.9 (390.43- 636.8)      | 704.13 (602.03- 857.53)       | 56.51 (25.94- 88.37)        | 0.86 (0.1- 1.63)     |
| Belgium             | 3791.85 (3203.76- 4238.96) | 4889.4 (4399.33- 5447.7)      | 29.83 (8.86- 65.03)         | 0.01 (-0.15- 0.16)   |
| Belize              | 11.85 (9.98- 14.18)        | 46.31 (42.26- 50.61)          | 119.58 (77.93- 169.96)      | 0.03 (-0.51- 0.58)   |
| Benin               | 122.75 (74.8- 178.45)      | 269.6 (193.09- 384.65)        | 83.4 (21.68- 176.34)        | -0.82 (-1.02- -0.63) |
| Bermuda             | 17.48 (13.04- 20.22)       | 11.03 (9.91- 12.26)           | -36.15 (-47.7- -9.61)       | -3.86 (-4.07- -3.64) |
| Bhutan              | 15.13 (8.99- 26.42)        | 27.44 (19.6- 37.01)           | 164.47 (48.86- 387)         | -0.63 (-0.76- -0.51) |

|                          |                            |                               |                         |                      |
|--------------------------|----------------------------|-------------------------------|-------------------------|----------------------|
| Bolivia                  | 639.25 (362.84- 997.64)    | 874.05 (680.67- 1066.77)      | 75.59 (11.99- 199.89)   | -2.3 (-2.56- -2.05)  |
| Bosnia and Herzegovina   | 222.01 (176.3- 303.25)     | 205 (182.93- 231.15)          | -0.87 (-30.06- 30.57)   | -1.22 (-1.52- -0.91) |
| Botswana                 | 102.41 (68.27- 147.56)     | 168.59 (122.46- 248.39)       | 20.25 (-21.88- 71.25)   | -1.33 (-1.52- -1.13) |
| Brazil                   | 12431.98 (11165- 15462.84) | 23640.57 (22119.57- 24885.88) | 80.72 (40.73- 110.5)    | -0.28 (-0.48- -0.08) |
| Brunei                   | 13 (8.13- 18.17)           | 35.46 (31.82- 39.5)           | 63.55 (14.38- 158.67)   | 0.09 (-0.22- 0.39)   |
| Bulgaria                 | 263.9 (222.63- 308.92)     | 285.37 (260.81- 312.63)       | 26.66 (4.02- 54.11)     | -0.07 (-0.45- 0.3)   |
| Burkina Faso             | 413.06 (213.42- 648.47)    | 535.2 (332.19- 847.15)        | 12.24 (-21.6- 69.79)    | -2.37 (-2.76- -1.98) |
| Burundi                  | 254.26 (139.76- 478.23)    | 193.92 (121.72- 322.96)       | -19.16 (-40.96- 30.68)  | -4.25 (-4.68- -3.82) |
| Cambodia                 | 524.07 (271.78- 966.71)    | 888.53 (691.74- 1225.99)      | 149.96 (61.37- 329.3)   | -1.01 (-1.09- -0.94) |
| Cameroon                 | 471.76 (315.28- 644.85)    | 932.78 (683.65- 1274.37)      | 35.08 (-8.26- 118.77)   | -1.66 (-2.03- -1.29) |
| Canada                   | 8047.12 (6434.23- 9301.94) | 11505.79 (10458.92- 12541.92) | 9.54 (-8.71- 42.76)     | -1.33 (-1.42- -1.25) |
| Cape Verde               | 3.89 (2.95- 5.14)          | 9.41 (8.13- 10.81)            | 150.7 (70.78- 258.73)   | -0.06 (-0.22- 0.1)   |
| Central African Republic | 111.5 (56.3- 219.05)       | 178.58 (104- 311.6)           | 16.28 (-15.98- 82.56)   | -0.71 (-0.86- -0.56) |
| Chad                     | 183.48 (84.03- 291.87)     | 276.7 (157.99- 450.39)        | 3.15 (-28.45- 58.56)    | -1.51 (-1.64- -1.37) |
| Chile                    | 1060.7 (852.79- 1240.7)    | 1549.9 (1359.14- 1773.83)     | 20.46 (-4.3- 60.3)      | -0.99 (-1.14- -0.84) |
| China                    | 38634 (28761.88- 51729.84) | 77194.46 (70757.79- 82160.25) | 120.79 (53.49- 205.66)  | 0.67 (0.2- 1.14)     |
| Colombia                 | 1452.01 (1226.78- 1646.08) | 2897.07 (2498.93- 3341.84)    | 83.98 (46.8- 142.77)    | -0.96 (-1.15- -0.77) |
| Comoros                  | 12.61 (7.23- 22.95)        | 19.39 (13.55- 27.74)          | 117.29 (43.25- 250.71)  | -1.45 (-1.71- -1.19) |
| Congo                    | 141.47 (78.7- 231.25)      | 235.57 (164.96- 330.18)       | 38.83 (-7.92- 118)      | -2.01 (-2.34- -1.68) |
| Costa Rica               | 81.51 (75.08- 89.02)       | 182.12 (164.29- 200.25)       | 38.65 (20.48- 58.24)    | -0.95 (-1.38- -0.52) |
| Cote d'Ivoire            | 442.75 (270.07- 634.58)    | 887.67 (609.23- 1231.16)      | 68.16 (16.05- 162.6)    | -1.27 (-1.61- -0.92) |
| Croatia                  | 503.58 (426.57- 562.24)    | 1472.65 (1337.47- 1622.37)    | 254.63 (202.16- 340.02) | 5.28 (4.18- 6.4)     |
| Cuba                     | 493.74 (391.8- 575.07)     | 556.99 (488.71- 635.74)       | 1.17 (-15.95- 25.7)     | -1.25 (-1.53- -0.97) |
| Cyprus                   | 195.72 (144.83- 260.49)    | 266.59 (232.31- 310.98)       | -5.51 (-35.11- 36.88)   | -1.89 (-2.19- -1.58) |
| Czech Republic           | 1061.53 (882.75- 1255.14)  | 1127.98 (1022.22- 1249.65)    | 25 (0.27- 60.25)        | -0.66 (-0.8- -0.53)  |

|                                  |                               |                               |                         |                      |
|----------------------------------|-------------------------------|-------------------------------|-------------------------|----------------------|
| Democratic Republic of the Congo | 869.56 (534- 1475.2)          | 1588.62 (1091.91- 2418.48)    | 53.42 (15.31- 114.21)   | -0.78 (-0.99- -0.57) |
| Denmark                          | 1864.79 (1652.71- 2049.71)    | 2587.72 (2324.73- 2892.02)    | 51.64 (30.54- 83.96)    | -0.05 (-0.16- 0.07)  |
| Djibouti                         | 8.44 (4.76- 14.99)            | 26.22 (17.46- 41.11)          | 138.91 (61.45- 282.21)  | -0.44 (-0.61- -0.26) |
| Dominica                         | 3.92 (3.44- 4.51)             | 7.3 (6.49- 8.14)              | 71.84 (41.45- 107.67)   | 1.17 (1.08- 1.26)    |
| Dominican Republic               | 123.16 (107.45- 142.83)       | 288.5 (240.41- 343.43)        | 103.74 (61.93- 153.24)  | 0.36 (-0.14- 0.86)   |
| Ecuador                          | 287.17 (244.84- 323.67)       | 729.79 (641.46- 820.32)       | 97.49 (58.76- 151.9)    | 0.81 (0.33- 1.3)     |
| Egypt                            | 887.66 (463.8- 1445.42)       | 4105.33 (2085.13- 6214.44)    | 384.52 (280.09- 550.86) | 3.99 (3.43- 4.56)    |
| El Salvador                      | 143.33 (123.58- 169.38)       | 235.25 (190.4- 289.37)        | 91.07 (44.85- 140.56)   | -0.37 (-0.6- -0.15)  |
| Equatorial Guinea                | 18.71 (9.22- 37.88)           | 19.32 (11.72- 30.89)          | 4.02 (-49.88- 94.45)    | -3.82 (-4.26- -3.37) |
| Eritrea                          | 117.17 (63.16- 220.57)        | 212.33 (146.42- 297.44)       | 262.82 (128.54- 531.43) | -1.13 (-1.21- -1.06) |
| Estonia                          | 66.87 (60.17- 75.69)          | 104.23 (88.18- 122.84)        | 125.44 (80.92- 170.04)  | 1.06 (0.59- 1.54)    |
| Ethiopia                         | 2237.91 (1089.24- 4496.82)    | 1601.51 (927.57- 2218.65)     | 11.3 (-33.8- 142.44)    | -4.15 (-4.48- -3.82) |
| Federated States of Micronesia   | 5.12 (3.73- 7.52)             | 8.66 (5.68- 11.58)            | 92.62 (31.83- 158.78)   | 0.76 (0.7- 0.83)     |
| Fiji                             | 24.58 (20.46- 29.06)          | 64.23 (52.93- 76.26)          | 93.63 (48.64- 145.53)   | 1.85 (1.35- 2.35)    |
| Finland                          | 1498.12 (1199.73- 1696.93)    | 1893.53 (1683.95- 2121.62)    | 29.76 (8.55- 72.57)     | -0.64 (-0.86- -0.42) |
| France                           | 19208.88 (16257.99- 21857.27) | 31733.2 (28546.15- 35773.09)  | 64.35 (35.89- 111.9)    | 0.48 (0.12- 0.83)    |
| Gabon                            | 41.6 (24.98- 62.5)            | 62.45 (49.99- 97.97)          | 39.1 (-10.17- 123.35)   | -1.23 (-1.71- -0.75) |
| Georgia                          | 143.38 (113.03- 164.74)       | 568.56 (524.06- 612.97)       | 457.2 (370.65- 600.19)  | 7.6 (6.28- 8.93)     |
| Germany                          | 24534.51 (20088.67- 27635.63) | 29665.78 (26396.25- 33684.38) | 27.58 (9.63- 59.7)      | -0.49 (-0.61- -0.37) |
| Ghana                            | 757.16 (607.59- 930.68)       | 1010.4 (769.53- 1272.54)      | 13.18 (-22.71- 57.83)   | -3.3 (-3.85- -2.75)  |
| Greece                           | 1125.98 (918.6- 1359.17)      | 1479.82 (1353.33- 1611.26)    | 21.03 (-1.58- 51.49)    | -0.11 (-0.18- -0.04) |
| Greenland                        | 9.22 (6.29- 11.81)            | 14.49 (13.01- 16.23)          | 99.24 (44.6- 203.89)    | -0.25 (-0.77- 0.28)  |
| Grenada                          | 9.63 (7.75- 12.44)            | 9.6 (8.77- 10.46)             | -21.37 (-40.65- -2.74)  | -1.95 (-2.45- -1.44) |
| Guam                             | 4.65 (3.86- 5.65)             | 13.79 (11.91- 16.03)          | 77.44 (39.76- 128.25)   | 2.47 (1.83- 3.11)    |
| Guatemala                        | 221.91 (175.37- 298.9)        | 474.14 (422.99- 530.88)       | 100.22 (42.37- 164.73)  | -1.31 (-1.57- -1.04) |

|               |                               |                               |                         |                      |
|---------------|-------------------------------|-------------------------------|-------------------------|----------------------|
| Guinea        | 265.48 (132.71- 402.57)       | 402.15 (262.11- 624.82)       | 75.81 (15.18- 203.4)    | -0.56 (-0.78- -0.33) |
| Guinea-Bissau | 69.99 (36.49- 119.37)         | 90.08 (55.21- 145.07)         | 55.73 (2.24- 168.22)    | -1.71 (-1.87- -1.54) |
| Guyana        | 55.23 (47.74- 64.06)          | 68.82 (59.68- 78.36)          | 46.01 (18.75- 80.58)    | -0.59 (-1.1- -0.08)  |
| Haiti         | 607.17 (284.94- 1104.64)      | 836.6 (544.14- 1341.31)       | 44.32 (4.81- 144.54)    | -1.31 (-1.55- -1.08) |
| Honduras      | 149.3 (111.06- 223.82)        | 480.9 (355.2- 681.47)         | 162.53 (67.88- 328.83)  | 0.96 (0.76- 1.16)    |
| Hungary       | 922.9 (814.17- 1059.05)       | 916.47 (842.25- 1002.07)      | 30.2 (10.77- 51.9)      | -0.71 (-0.93- -0.49) |
| Iceland       | 43.15 (36.79- 48.29)          | 89.72 (82.38- 98.13)          | 72.11 (46.8- 111.66)    | 0.2 (-0.13- 0.54)    |
| India         | 26686.66 (16749.85- 47034.23) | 67892.25 (57412.77- 87283.23) | 183.18 (99.94- 290.46)  | 0.8 (0.59- 1)        |
| Indonesia     | 6153.94 (4184.15- 8650.34)    | 13251.75 (11404.08- 15001.45) | 140.17 (85.33- 225.26)  | 0.84 (0.58- 1.09)    |
| Iran          | 2145.82 (1698.12- 2931.33)    | 12579.23 (11438.78- 13555.72) | 566.29 (347.18- 789.07) | 4.9 (4.05- 5.76)     |
| Iraq          | 776.59 (514.44- 1094.51)      | 1258.52 (1118.14- 1405.1)     | 3.26 (-31.76- 61.74)    | -2.85 (-3.68- -2.02) |
| Ireland       | 785.1 (521.57- 968.47)        | 816.89 (729.04- 919.49)       | -5.01 (-26.61- 53.41)   | -1.97 (-2.12- -1.82) |
| Israel        | 612.39 (545.73- 675.89)       | 880.64 (793.12- 986.48)       | -4.07 (-18.38- 16.57)   | -1.83 (-2.06- -1.6)  |
| Italy         | 27183.16 (19897.04- 31894.86) | 30174.25 (27334.64- 33365.98) | 16.11 (-6.57- 68.34)    | -1.03 (-1.09- -0.96) |
| Jamaica       | 75.85 (65.58- 86.93)          | 139.98 (104.49- 173.77)       | 40.15 (-0.48- 88.42)    | -1.06 (-1.93- -0.18) |
| Japan         | 12931.08 (11658.06- 13699.94) | 26312.81 (24920.3- 28395.15)  | 72.31 (56.74- 101.97)   | 1.16 (0.9- 1.42)     |
| Jordan        | 136.37 (87.32- 187.91)        | 310.89 (254.18- 369.85)       | 30.22 (-19.8- 123.57)   | -2.49 (-2.89- -2.09) |
| Kazakhstan    | 907.2 (801.97- 1080.29)       | 1153.71 (1063.09- 1249.49)    | 39.93 (11.61- 64.09)    | -0.51 (-1.3- 0.28)   |
| Kenya         | 331.65 (214.44- 481.09)       | 929.08 (744.12- 1377.91)      | 105.84 (68.69- 167)     | -0.04 (-0.45- 0.36)  |
| Kiribati      | 1.63 (1.4- 1.89)              | 3.87 (3.18- 4.66)             | 101.03 (54.4- 168.56)   | 1.33 (1.13- 1.53)    |
| Kuwait        | 31.95 (29.67- 34.56)          | 164.26 (137.17- 208.14)       | 204.71 (153.76- 283.93) | 2.48 (1.44- 3.54)    |
| Kyrgyzstan    | 71.95 (63.35- 81.19)          | 148.07 (130.93- 175.14)       | 135.86 (93.31- 204.93)  | 1.41 (1.08- 1.75)    |
| Laos          | 250.2 (104.59- 478.59)        | 314.24 (219.12- 439.02)       | 91.63 (16.84- 291.31)   | -1.9 (-2.04- -1.77)  |
| Latvia        | 183.03 (161.82- 207.79)       | 205.44 (179- 237.93)          | 62.22 (34.73- 90.47)    | 0.18 (-0.36- 0.72)   |
| Lebanon       | 71.1 (45.65- 97.13)           | 194.98 (139.52- 284.86)       | 100.8 (17.62- 215.22)   | 0.51 (0.31- 0.71)    |



|                  |                             |                              |                         |                      |
|------------------|-----------------------------|------------------------------|-------------------------|----------------------|
| Lesotho          | 256.36 (168.08- 360.17)     | 403.82 (309.37- 535.72)      | 22.99 (-18.22- 82.13)   | 1.22 (0.83- 1.61)    |
| Liberia          | 60.41 (35.22- 91.25)        | 105.76 (72.1- 163.27)        | 129.86 (56.36- 261.53)  | -0.91 (-1.2- -0.62)  |
| Libya            | 59.5 (39.65- 81.11)         | 450.26 (270.05- 739.13)      | 382.04 (219.39- 622.7)  | 4.77 (4.42- 5.12)    |
| Lithuania        | 329.41 (293.97- 372.23)     | 227.26 (207.7- 248.18)       | -17.44 (-29.86- -5.05)  | -2.33 (-2.87- -1.8)  |
| Luxembourg       | 118.3 (92.8- 134.77)        | 166.51 (141.85- 198.71)      | 19.69 (-3.72- 73.55)    | -0.62 (-0.73- -0.5)  |
| Macedonia        | 46.69 (37.44- 58.79)        | 48.95 (42.31- 55.94)         | -1.97 (-29.77- 31.67)   | -1.86 (-2.25- -1.46) |
| Madagascar       | 248.77 (146.43- 450.39)     | 389.02 (235.24- 665.28)      | 30.08 (0.04- 71.38)     | -1.31 (-1.44- -1.17) |
| Malawi           | 165.34 (67.2- 338.33)       | 257.12 (161.98- 385.37)      | 134.36 (55.47- 419.32)  | -1.45 (-1.97- -0.93) |
| Malaysia         | 504.2 (430.42- 625.86)      | 1334.18 (1137.58- 1565.52)   | 60.94 (20.86- 101.56)   | 0.77 (0.61- 0.94)    |
| Maldives         | 39.95 (16.6- 70)            | 40.09 (34.11- 48.11)         | 24.54 (-38.07- 231.21)  | -4.42 (-4.7- -4.13)  |
| Mali             | 416.14 (209.2- 696.96)      | 362.63 (214.59- 561.46)      | -21.81 (-43.5- 18.95)   | -3.64 (-4.07- -3.21) |
| Malta            | 84.46 (70.87- 95.16)        | 181.13 (163.49- 199.3)       | 68.29 (44.35- 103.76)   | 0.52 (0.36- 0.69)    |
| Marshall Islands | 1.55 (0.95- 2.49)           | 4.14 (2.74- 5.95)            | 108.47 (58.66- 172.71)  | 1.18 (0.88- 1.48)    |
| Mauritania       | 100.63 (65.98- 142.17)      | 98.69 (78.61- 122.7)         | 14.8 (-21.26- 78.13)    | -3.11 (-3.46- -2.75) |
| Mauritius        | 29.18 (24.87- 34.66)        | 40.64 (36.99- 44.82)         | 11.73 (-11.92- 34.98)   | -0.63 (-1.01- -0.25) |
| Mexico           | 3876.07 (3344.98- 4457.49)  | 10336.56 (9943.82- 10687.14) | 111.04 (79.54- 146.78)  | 0.91 (0.68- 1.14)    |
| Moldova          | 171.9 (149.91- 201.36)      | 172.22 (155.57- 191.53)      | 26.15 (6.52- 47.23)     | -1.07 (-1.62- -0.52) |
| Mongolia         | 98.67 (69.49- 128.75)       | 98.63 (83.02- 117.71)        | 5.74 (-26.98- 63.76)    | -4.89 (-5.62- -4.15) |
| Montenegro       | 22.69 (20.52- 25.21)        | 36.72 (30.66- 42.72)         | 39.78 (15.27- 65.6)     | 0.44 (0.05- 0.83)    |
| Morocco          | 356.49 (187.1- 598.27)      | 1527.76 (969.6- 2172.93)     | 372.56 (226.64- 585.62) | 3.62 (3.26- 3.97)    |
| Mozambique       | 359.63 (183.9- 701.58)      | 564.06 (359.01- 949.73)      | 62.2 (16.83- 152.7)     | -0.64 (-0.96- -0.33) |
| Myanmar          | 9266.98 (3291.55- 19367.16) | 6528.43 (4589.79- 8725.76)   | 7.81 (-38.16- 134.69)   | -3.34 (-3.61- -3.07) |
| Namibia          | 188.82 (132.14- 254.28)     | 248.53 (191.66- 335.8)       | 4.23 (-28.48- 42.46)    | -2.05 (-2.59- -1.5)  |
| Nepal            | 523.71 (274.35- 1017.2)     | 944.14 (651.38- 1365.7)      | 199.2 (92.54- 425.71)   | -0.27 (-0.66- 0.13)  |
| Netherlands      | 8453.83 (7357.15- 9392.2)   | 11105.64 (10188.88- 12123.9) | 20.7 (4.61- 42.7)       | -0.96 (-1.15- -0.76) |

|                                  |                               |                               |                         |                      |
|----------------------------------|-------------------------------|-------------------------------|-------------------------|----------------------|
| New Zealand                      | 1338.34 (905.76- 1602.15)     | 1768.82 (1584.51- 1965.6)     | 15.45 (-7.72- 79.87)    | -1.16 (-1.39- -0.93) |
| Nicaragua                        | 46.4 (37.87- 56.98)           | 138.21 (115.05- 163.49)       | 237.92 (140.69- 349.89) | 0.65 (0.45- 0.85)    |
| Niger                            | 205.5 (97.95- 337.25)         | 283.41 (159.38- 472.08)       | 40.6 (1.48- 102.78)     | -2.88 (-3.27- -2.5)  |
| Nigeria                          | 2079.19 (1409.32- 2862.74)    | 2533.89 (1629.13- 3767.97)    | 0.92 (-37.67- 62.21)    | -2.67 (-2.94- -2.39) |
| North Korea                      | 606.77 (427.74- 823.43)       | 1699.77 (1280.18- 2307.68)    | 87.62 (52.98- 131.67)   | 2.41 (2.11- 2.71)    |
| Northern Mariana Islands         | 0.82 (0.64- 1)                | 1.66 (1.42- 1.89)             | 50.1 (20.48- 95.26)     | 0.51 (0.11- 0.9)     |
| Norway                           | 1249.25 (1072.95- 1375.87)    | 1401.1 (1304.41- 1541.16)     | 14.98 (-2.23- 46.44)    | -0.51 (-0.77- -0.25) |
| Oman                             | 60.16 (39.76- 94.88)          | 267.13 (192.96- 354.92)       | 209.27 (64.27- 430.86)  | 2.5 (2.12- 2.89)     |
| Pakistan                         | 1940.63 (1230.22- 3149.38)    | 5720.61 (4264.98- 7652.88)    | 169.12 (95.72- 288.47)  | 0.76 (0.39- 1.14)    |
| Palestine                        | 26.56 (17.03- 40.28)          | 62.62 (54.55- 71.7)           | 66.97 (-0.64- 176.71)   | -1.33 (-1.53- -1.13) |
| Panama                           | 61.96 (54.75- 68.95)          | 146.89 (132.81- 161.88)       | 52.76 (28.26- 81.25)    | 0.23 (0.03- 0.43)    |
| Papua New Guinea                 | 222.41 (125.24- 406.38)       | 598.99 (374.74- 1017.11)      | 47.76 (19.31- 88.68)    | 0.71 (0.53- 0.89)    |
| Paraguay                         | 94.27 (79.82- 110.09)         | 300.86 (243.98- 367.7)        | 120.41 (72.94- 180.51)  | 1.23 (1.09- 1.37)    |
| Peru                             | 2850.06 (2315.48- 3469.2)     | 1437.66 (1182.35- 1714.77)    | -32.2 (-50.03- -12.67)  | -8.14 (-9.37- -6.9)  |
| Philippines                      | 2472.25 (2243.05- 2738.43)    | 4850.04 (4162.81- 5595.38)    | 51.96 (28.64- 77.46)    | -0.34 (-0.48- -0.2)  |
| Poland                           | 2432.55 (2045.94- 2931.11)    | 7158.69 (6533.07- 7845.48)    | 226.42 (157.53- 308.41) | 3.71 (3.22- 4.22)    |
| Portugal                         | 906.01 (708.69- 1103.92)      | 1390.06 (1239.76- 1563.06)    | 63.93 (26.33- 127.33)   | 0.11 (-0.42- 0.66)   |
| Puerto Rico                      | 201.05 (178.33- 224.51)       | 266.7 (239.47- 297.28)        | 20.64 (0.83- 46.03)     | -0.99 (-1.26- -0.72) |
| Qatar                            | 5.26 (3.83- 7.21)             | 81.93 (60.97- 112.29)         | 251.53 (114.74- 492.93) | 3.46 (2.89- 4.02)    |
| Romania                          | 1494.22 (1352.04- 1681.58)    | 1844.4 (1680.22- 2014.43)     | 50.33 (28.31- 71.16)    | 0.1 (-0.13- 0.32)    |
| Russian Federation               | 12472.65 (10565.18- 16236.16) | 15424.88 (14698.05- 16228.13) | 23.6 (-2.6- 46.02)      | -0.28 (-0.8- 0.24)   |
| Rwanda                           | 259.87 (149.17- 481.11)       | 216.2 (142.57- 307.24)        | 40.19 (-13.28- 194.75)  | -4.33 (-4.96- -3.7)  |
| Saint Lucia                      | 6.9 (5.73- 8.29)              | 10.86 (9.85- 12.01)           | 22.35 (-2.92- 50.78)    | -1.94 (-2.32- -1.55) |
| Saint Vincent and the Grenadines | 4.29 (3.82- 4.9)              | 6.91 (6.29- 7.55)             | 34.94 (12.97- 59.37)    | -0.68 (-0.95- -0.41) |
| Samoa                            | 4.95 (3.95- 6.2)              | 7.27 (5.6- 9.41)              | 25.49 (1.9- 57.8)       | 0.01 (-0.07- 0.08)   |

|                       |                            |                             |                         |                      |
|-----------------------|----------------------------|-----------------------------|-------------------------|----------------------|
| Sao Tome and Principe | 2.32 (1.37- 3.29)          | 4.92 (3.99- 5.99)           | 162.61 (77.81- 357.17)  | -0.04 (-0.29- 0.2)   |
| Saudi Arabia          | 101.29 (62.48- 152.81)     | 611.22 (392.3- 824.19)      | 413.65 (128.71- 908.92) | 2.84 (2.54- 3.14)    |
| Senegal               | 224.88 (132.14- 320.37)    | 461.37 (338.12- 622.6)      | 140.03 (77.54- 255.11)  | -0.56 (-0.7- -0.42)  |
| Serbia                | 698.36 (587.99- 838.97)    | 935.34 (810.22- 1063.98)    | 43.79 (18.47- 73.99)    | 0.61 (0.17- 1.04)    |
| Seychelles            | 4.2 (2.96- 5.61)           | 6.53 (5.05- 7.86)           | 12.85 (-15.11- 41.25)   | -1.28 (-1.41- -1.15) |
| Sierra Leone          | 98.14 (57.85- 151.22)      | 234.41 (159.48- 357.59)     | 155.84 (61.37- 314.53)  | 0.89 (0.71- 1.07)    |
| Singapore             | 268.06 (169.19- 352.5)     | 390.65 (352.37- 432.28)     | 0.19 (-26.5- 65.91)     | -2.49 (-2.73- -2.26) |
| Slovakia              | 379.92 (313.28- 459.73)    | 396.46 (345.18- 453.51)     | 14.4 (-13.89- 48.23)    | -0.91 (-1.06- -0.77) |
| Slovenia              | 313.81 (263.07- 362.62)    | 657.14 (582.56- 745.97)     | 119.63 (79.29- 182.95)  | 2.05 (1.37- 2.73)    |
| Solomon Islands       | 14.85 (9.25- 26.12)        | 35.45 (24.91- 56)           | 62.01 (27.27- 117.01)   | 0.55 (0.42- 0.68)    |
| Somalia               | 190.97 (74.89- 421.29)     | 380.31 (208.96- 677.24)     | 75.23 (15.41- 240.74)   | -1.11 (-1.37- -0.85) |
| South Africa          | 3809 (3306.24- 4347.24)    | 7247.87 (6454.34- 8151.49)  | 39.8 (21.71- 60.41)     | -0.5 (-1.31- 0.32)   |
| South Korea           | 1356.01 (1081.05- 1586.91) | 2757.69 (2420.07- 3279.44)  | 98.58 (53.09- 185.53)   | 0.46 (0.12- 0.8)     |
| South Sudan           | 80.11 (28.73- 188.4)       | 129.91 (65.39- 247.51)      | 36.48 (-13.41- 157.88)  | -0.56 (-0.84- -0.29) |
| Spain                 | 7341.25 (6198.72- 8444.1)  | 9562.43 (8732.26- 10501.66) | 23.3 (3.47- 54.72)      | -0.67 (-0.79- -0.55) |
| Sri Lanka             | 1407.26 (1088.82- 1857.81) | 2248.46 (1742.97- 2786.97)  | 69.13 (10.32- 140.71)   | -1.07 (-1.47- -0.66) |
| Sudan                 | 236.5 (108.37- 468.19)     | 839.51 (530.17- 1290.65)    | 335.55 (172.18- 661.59) | 2.82 (2.53- 3.1)     |
| Suriname              | 18.7 (16.41- 21.18)        | 33.26 (29.31- 37.36)        | 35.79 (12.71- 63.3)     | -0.74 (-0.95- -0.52) |
| Swaziland             | 67.22 (46.29- 92.44)       | 122.43 (95.79- 151.95)      | 25.13 (-13.66- 85.06)   | 0.23 (-0.33- 0.8)    |
| Sweden                | 3089.02 (2593.16- 3531.39) | 2898.6 (2666.19- 3146.69)   | -3.51 (-19.18- 18.85)   | -1.22 (-1.34- -1.11) |
| Switzerland           | 2557.36 (2117.05- 2862)    | 3392.23 (3029.54- 3873.22)  | 31.12 (9.56- 74.48)     | -0.13 (-0.4- 0.13)   |
| Syria                 | 235.49 (144.64- 363.02)    | 545.14 (434.89- 687.7)      | 47.76 (-15.13- 166.99)  | -0.41 (-0.66- -0.16) |
| Taiwan (China)        | 615.49 (494.98- 799.79)    | 1158.12 (1073.16- 1248.17)  | 42.63 (6.97- 80.59)     | -0.36 (-0.64- -0.07) |
| Tajikistan            | 290.3 (217.54- 357.96)     | 651.94 (579.73- 737.69)     | 99.51 (53.03- 178.22)   | 0.13 (-0.12- 0.38)   |
| Tanzania              | 502.3 (264.41- 879.16)     | 930.41 (597.19- 1302.76)    | 92 (33.74- 192.64)      | -1.2 (-1.54- -0.86)  |

|                      |                               |                               |                         |                      |
|----------------------|-------------------------------|-------------------------------|-------------------------|----------------------|
| Thailand             | 7255.43 (6111.49- 8868.56)    | 7905.65 (6777.18- 9135.14)    | -4.9 (-28.12- 18.79)    | -3.41 (-4.06- -2.75) |
| The Bahamas          | 15.17 (13.03- 17.06)          | 28.3 (25.4- 31.41)            | 21.55 (3.35- 43.11)     | -0.67 (-0.82- -0.53) |
| The Gambia           | 24.22 (14.22- 35.49)          | 52.72 (39.89- 72.98)          | 79.37 (21.9- 199.62)    | -0.5 (-0.59- -0.41)  |
| Timor-Leste          | 21.59 (11.92- 38.33)          | 42.7 (25.77- 56.68)           | 199.45 (62.94- 503.69)  | 0.4 (0.08- 0.71)     |
| Togo                 | 123.87 (79.26- 176.51)        | 235.65 (173.82- 326.85)       | 72.2 (19.89- 170.52)    | -1.75 (-2.02- -1.48) |
| Tonga                | 2.52 (2.13- 3.01)             | 4.15 (3.41- 4.94)             | 51.56 (21.2- 87.18)     | 0.87 (0.78- 0.96)    |
| Trinidad and Tobago  | 39.78 (36- 44.75)             | 70.6 (57.04- 85.97)           | 44.75 (19.54- 74.15)    | -0.37 (-1.22- 0.49)  |
| Tunisia              | 65.16 (52.88- 85.13)          | 339.82 (232.32- 513.59)       | 408.43 (235.43- 632.8)  | 3.65 (3.18- 4.12)    |
| Turkey               | 17263.86 (10014.13- 26376.56) | 17606.89 (15576.45- 19884.5)  | 22.81 (-24.28- 112.65)  | -3.24 (-3.71- -2.77) |
| Turkmenistan         | 67.34 (56.42- 78.78)          | 167.89 (143.47- 189.26)       | 156.13 (115.99- 199.23) | 0.86 (0.42- 1.3)     |
| Uganda               | 247.5 (109.81- 447.97)        | 431.71 (272.8- 618.79)        | 123.21 (47.75- 279.75)  | -1.29 (-1.56- -1.03) |
| Ukraine              | 3800.56 (3173.69- 4579.17)    | 5834.51 (5393.74- 6269.26)    | 57.66 (27.18- 93.26)    | 1.02 (0.57- 1.48)    |
| United Arab Emirates | 19.29 (11.14- 30.73)          | 476.7 (257.09- 826.11)        | 381.55 (207.11- 637.09) | 4.9 (4.52- 5.29)     |
| United Kingdom       | 43696.85 (33986.95- 51264.33) | 48645.34 (46917.87- 50511.22) | 15.02 (-4.7- 49.26)     | -0.77 (-0.81- -0.72) |
| United States        | 47003.3 (42009.41- 50807)     | 56331.81 (54180.02- 58595.56) | -5.95 (-15.59- 6.05)    | -1.53 (-1.69- -1.36) |
| Uruguay              | 207.87 (187.6- 229.35)        | 299.38 (264.92- 336.87)       | 46.54 (25.94- 69.56)    | 0.84 (0.53- 1.16)    |
| Uzbekistan           | 481.97 (392.88- 621.26)       | 772.87 (674.89- 875.72)       | 30.68 (0.64- 67.48)     | -1.53 (-2.24- -0.82) |
| Vanuatu              | 7.37 (4.33- 10.92)            | 23.08 (13.82- 37.31)          | 75.71 (32.86- 138.48)   | 1.38 (1.25- 1.51)    |
| Venezuela            | 499.44 (449.86- 567.63)       | 1135.58 (967.05- 1336.9)      | 47.16 (21.33- 76.07)    | -0.92 (-1.19- -0.66) |
| Vietnam              | 2375.28 (1804.83- 3203.12)    | 5245.87 (4398.13- 6297.22)    | 104.45 (46.92- 171.72)  | 0.11 (-0.02- 0.24)   |
| Virgin Islands, U.S. | 13.9 (12.49- 15.76)           | 27.65 (22.66- 32.1)           | 48.69 (26.71- 70.44)    | 0.69 (0.51- 0.87)    |
| Yemen                | 195.94 (60.78- 465.82)        | 936.42 (500.51- 1607.62)      | 371.57 (192.72- 969.65) | 2.71 (2.39- 3.03)    |
| Zambia               | 216.09 (123.42- 382.96)       | 421.54 (316.96- 584.82)       | 100.91 (36.14- 222.7)   | -1.5 (-2.11- -0.88)  |
| Zimbabwe             | 113.5 (81.28- 177.8)          | 382.94 (306.07- 492.35)       | 156.35 (80.42- 262.7)   | 3.35 (2.04- 4.66)    |

CI: confidence interval; DALY, disability adjusted life-year; EAPC: estimated annual percentage change; UI: uncertainty interval.

**eFigure 1. Mesothelioma Cases With Age Composition by SDI Region From 1990 to 2017**

The data from certain SDI regions are presented in the top-right panel. (A: The cases of incidence; B: The cases of death; C: The number of DALY).

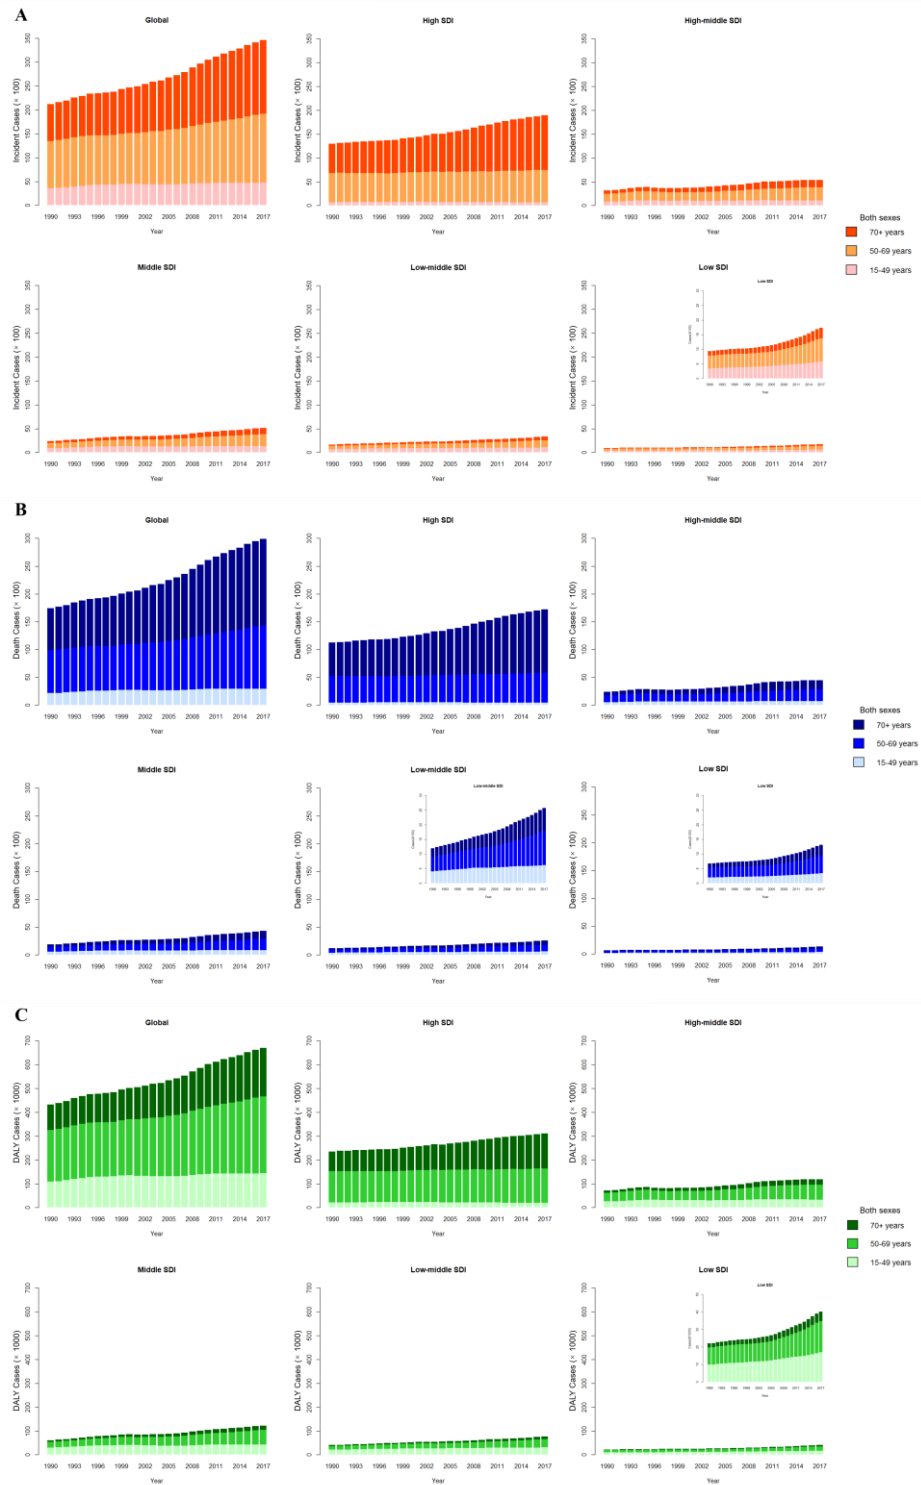

**eFigure 2.** Age-Standardized Incidence Rates for Mesothelioma per 100 000 People in 21 Geographic Regions by SDI in 2017

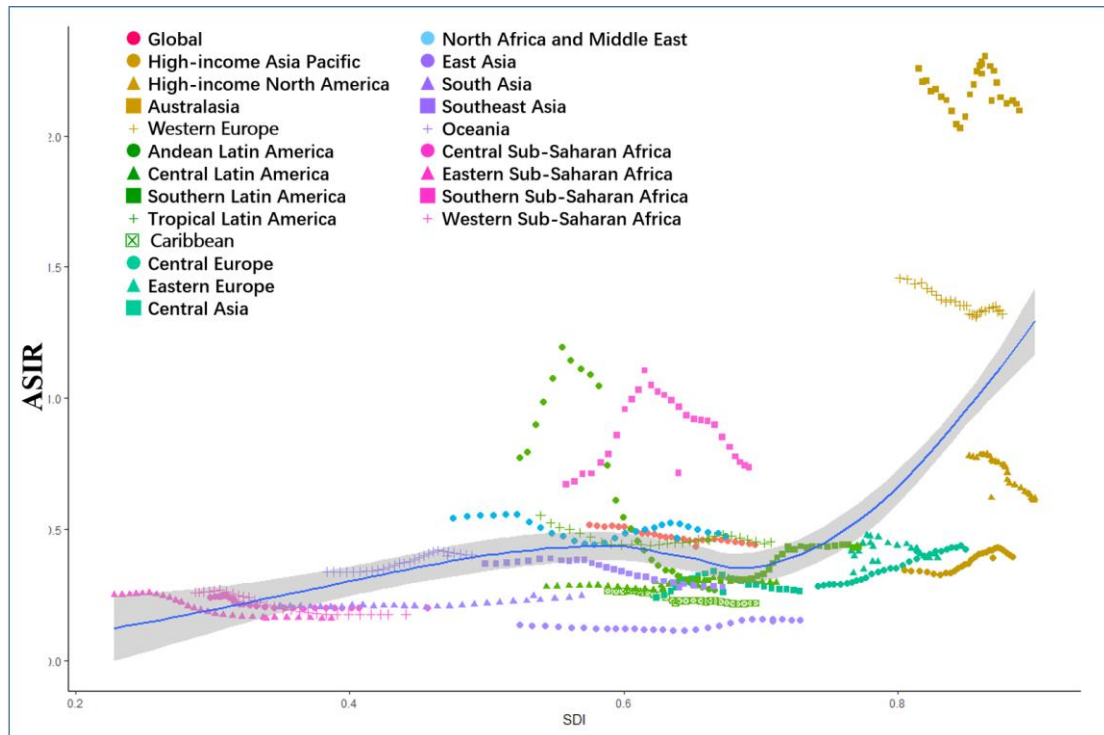

**eFigure 3.** Age-Standardized Death Rates for Mesothelioma per 100 000 People in 21 Geographic Regions by SDI in 2017

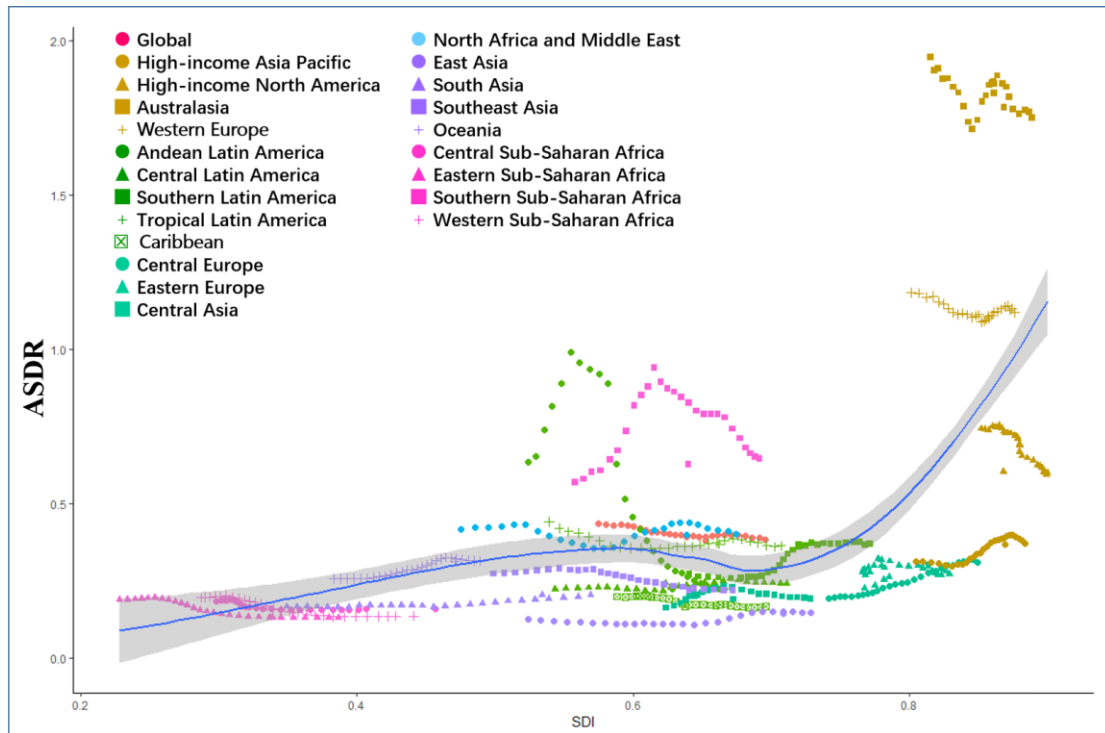

**eFigure 4.** Proportion of Age Subgroups of Incident Cases by Region and Year in 1990 and 2017

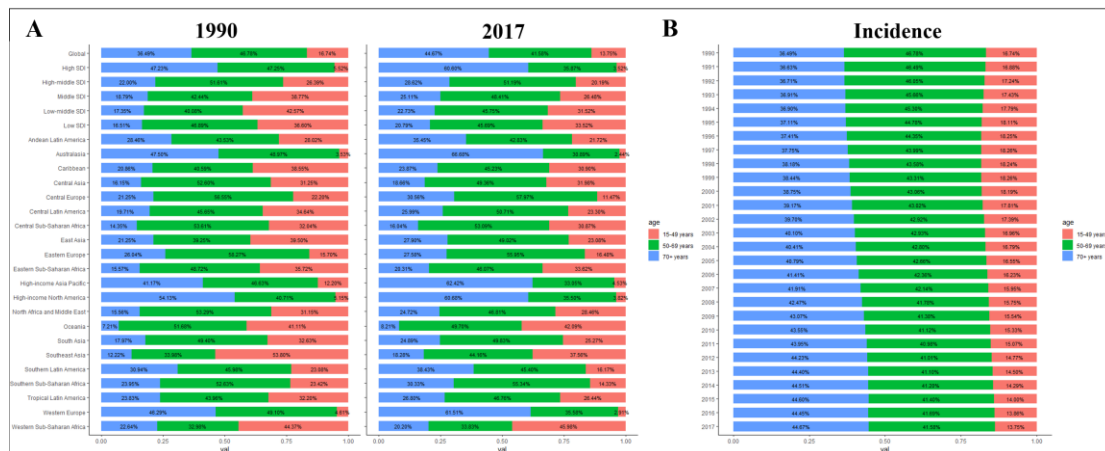



**eFigure 5.** Proportion of Age Subgroups of Incident Cases by Year Among Female and Male Patients

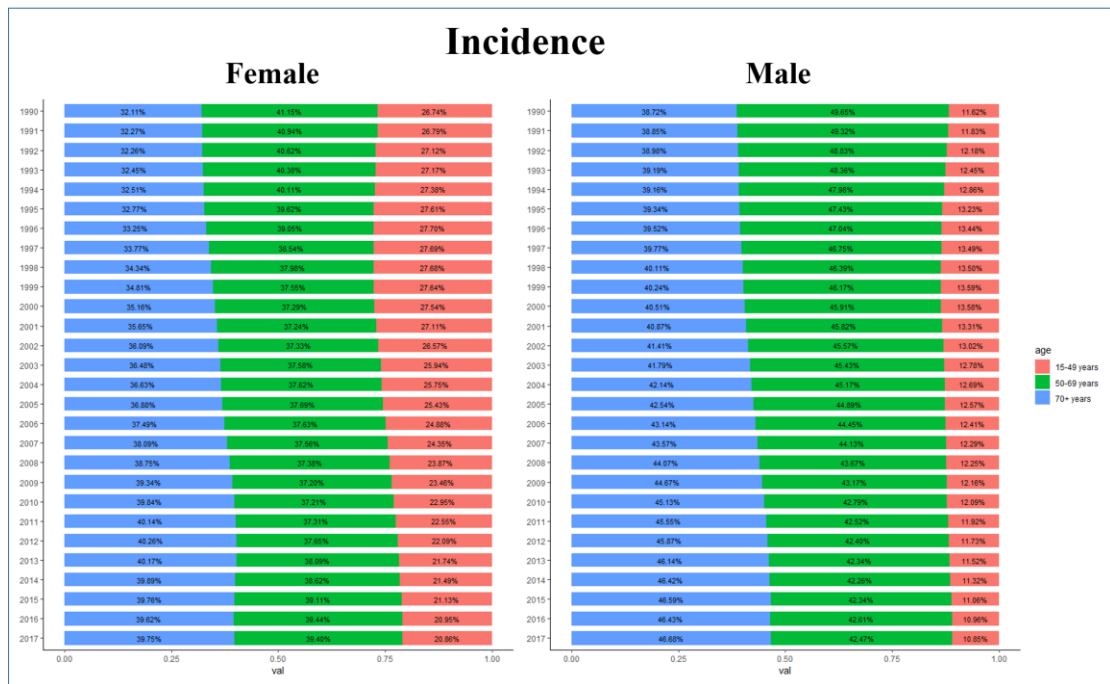

**eFigure 6.** Mesothelioma Cases With Age Composition Among Female Patients by SDI Region From 1990 to 2017

The data from certain SDI regions are presented in the top-right panel. (A: The cases of incidence; B: The cases of death; C: The number of DALY).

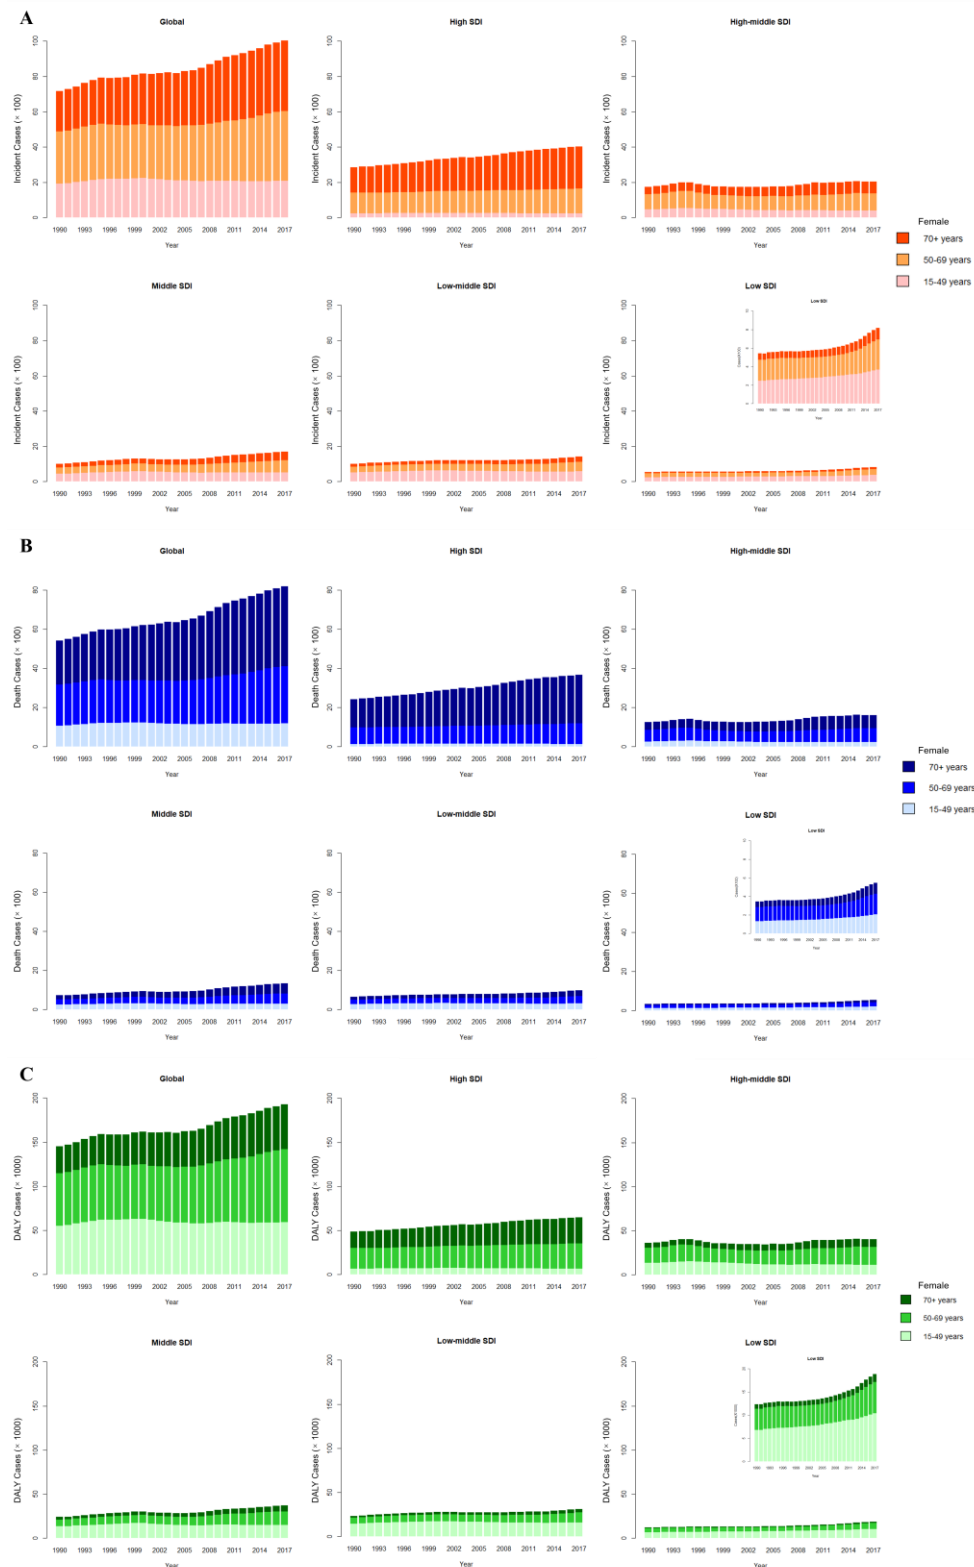

**eFigure 7. Mesothelioma Cases With Age Composition Among Men by SDI Region From 1990 to 2017**

The data from certain SDI regions are presented in the top-right panel. (A: The cases of incidence; B: The cases of death; C: The number of DALY).

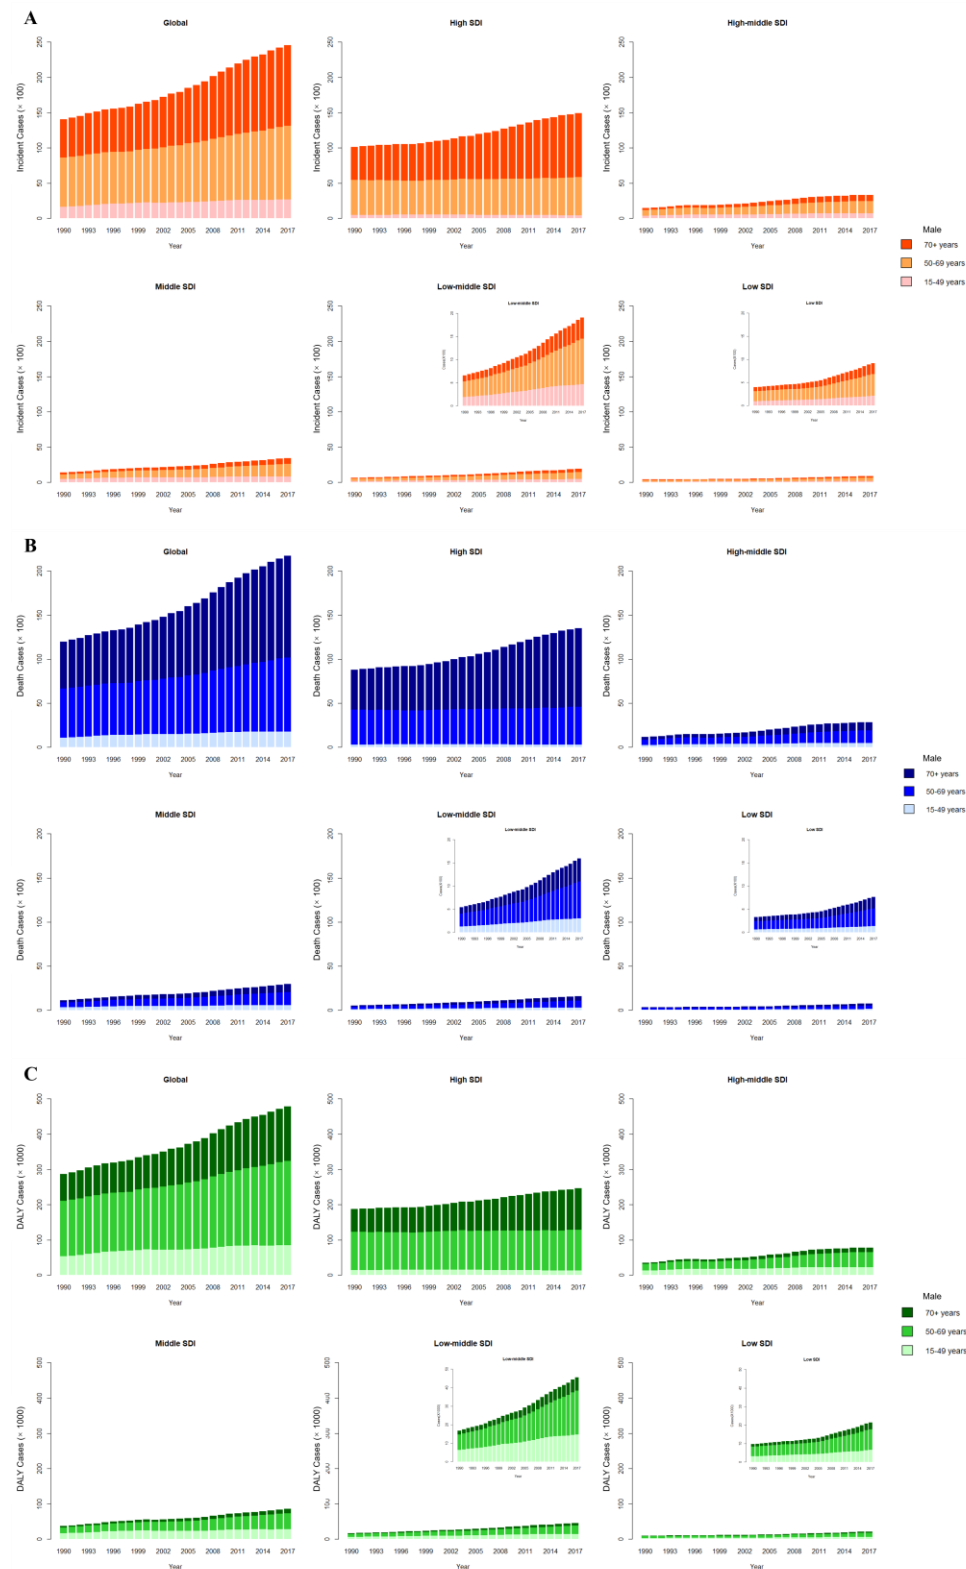

**eFigure 8.** Comparison of Incidence Rates With Age Composition Between Female and Male Patients

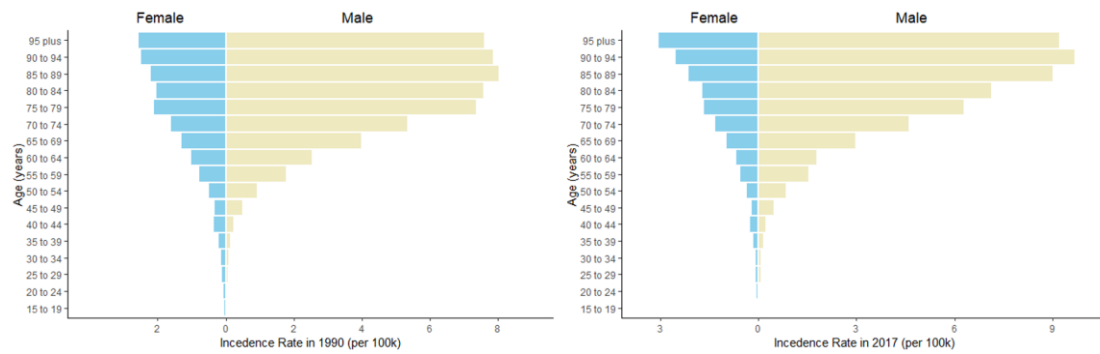

**eFigure 9.** Comparison of Death Rates With Age Composition Between Female and Male Patients

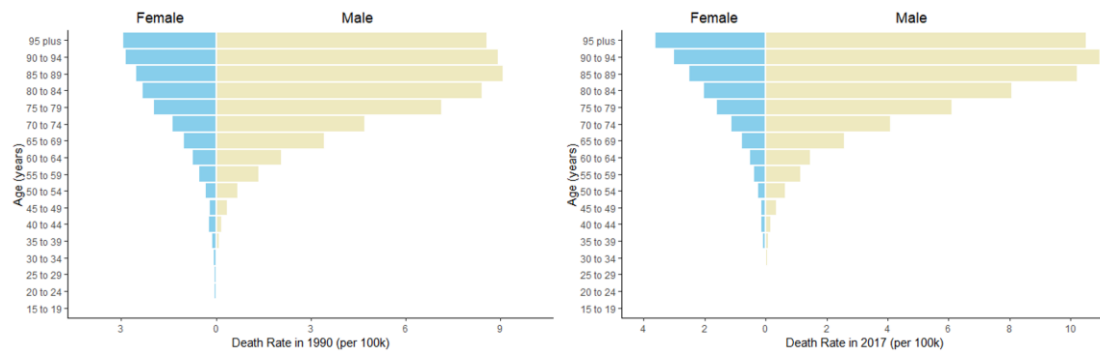

**eFigure 10.** Comparison of DALY Rates With Age Composition Between Female and Male Patients

DALY, disability adjusted life-year.

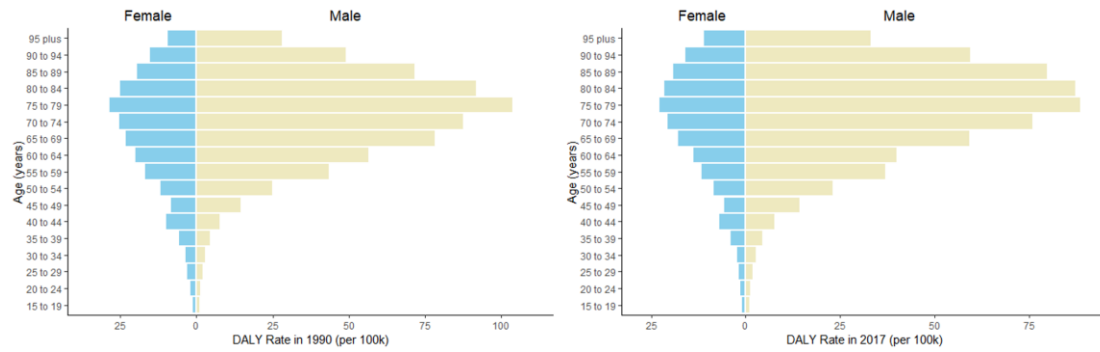

**eFigure 11.** Temporal Trends of Age-Standardized Incidence Rates (ASIRs) for Mesothelioma per 100 000 People in 47 Countries With Complete Asbestos Bans

Symbol of each country was shown in the eTable 1.

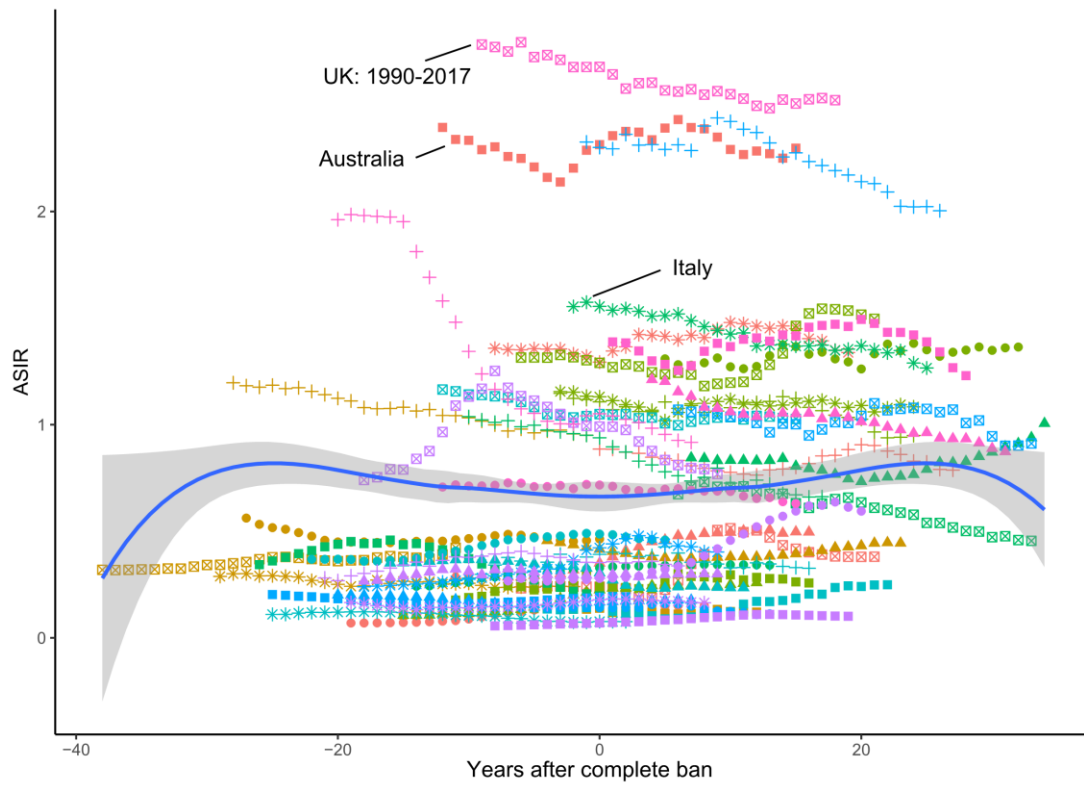

**eFigure 12.** Comparison Between Deaths in 1990 vs 2017 With Age Composition at Regional Level

The left column in each group is case data in 1990 and the right column in 2017. Those data from certain regions can be viewed in the top-right of the panel.

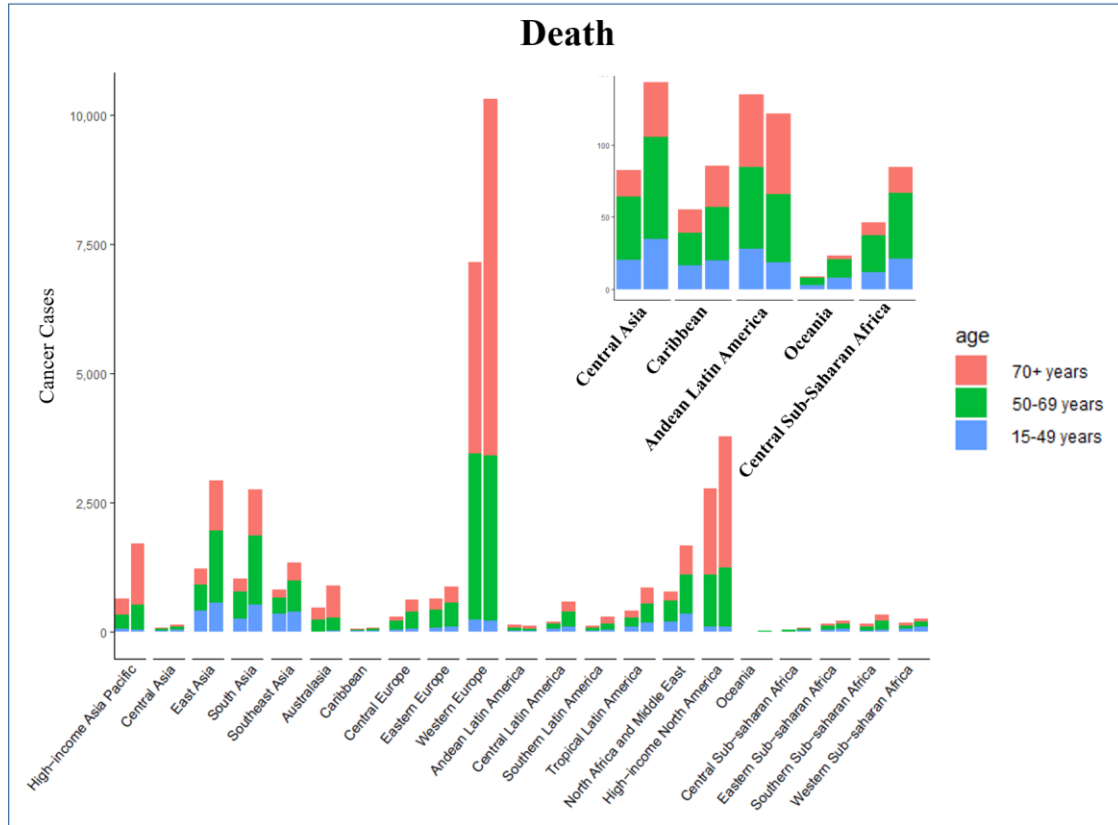



**eFigure 13.** Comparison Between DALYs in 1990 vs 2017 With Age Composition at Regional Level

The left column in each group is case data in 1990 and the right column in 2017. Those data from certain regions can be viewed in the top-right of the panel. DALY, disability adjusted life-year.

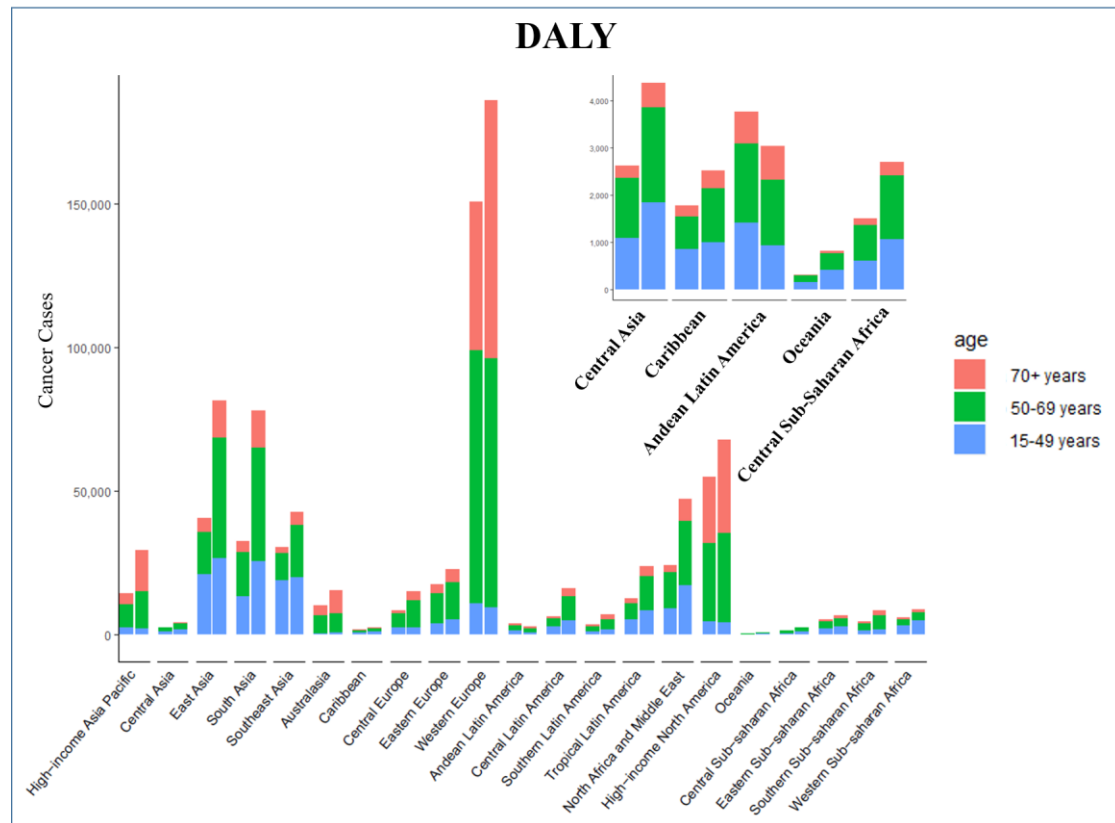

**eFigure 14.** Proportion of Deaths in Age Subgroups by Region and Year

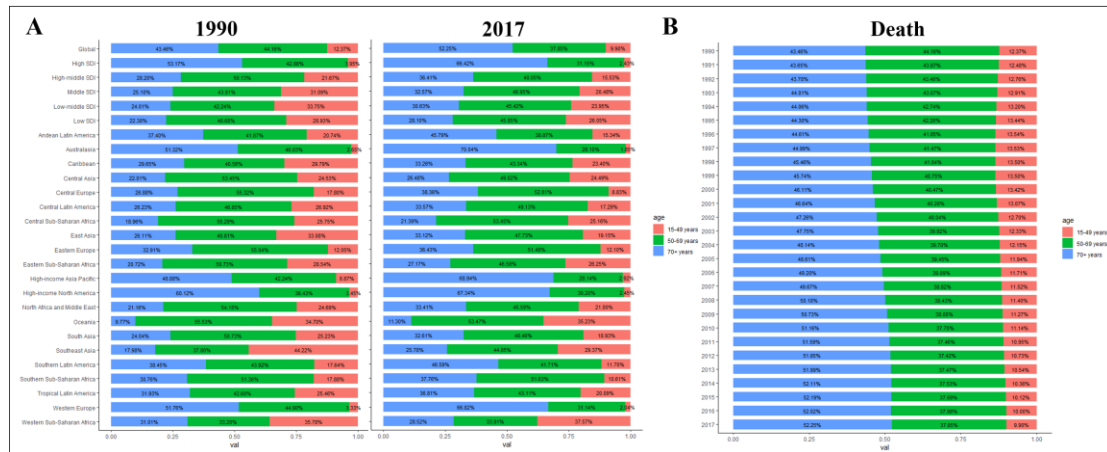

**eFigure 15.** Age-Standardized DALY Rates for Mesothelioma per 100 000 People in 21 Geographic Regions by SDI in 2017

DALY, disability adjusted life-year.

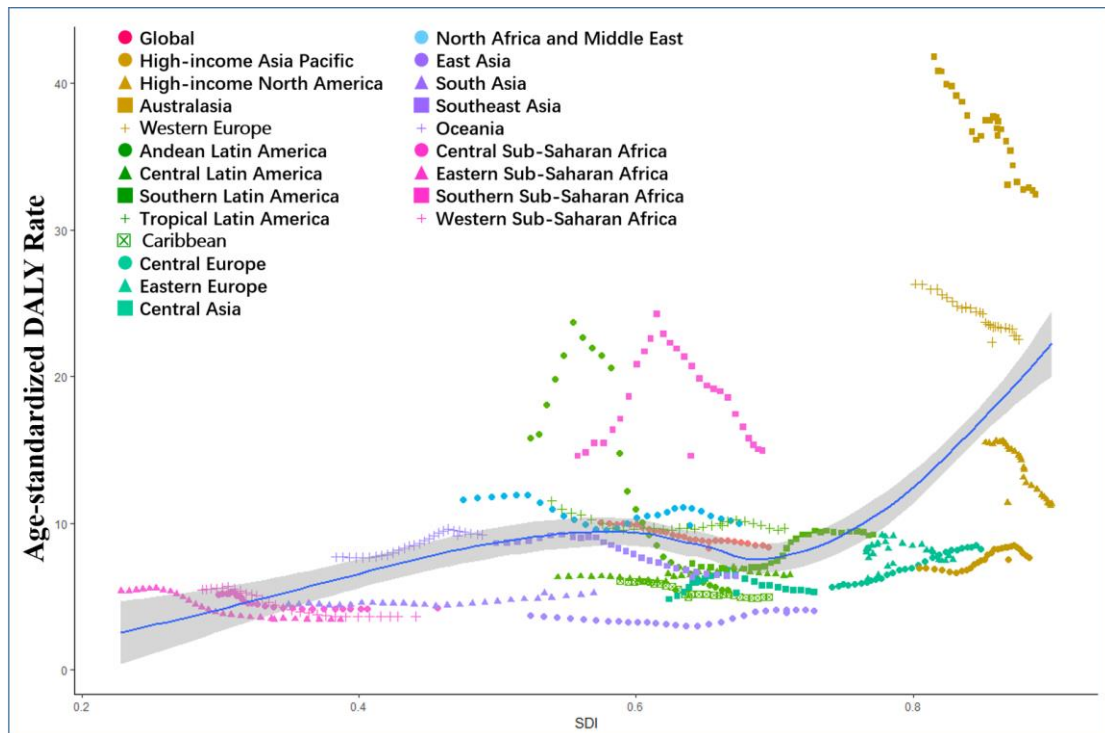

**eFigure 16.** Temporal Trends of Age-Standardized Incidence, Death, and DALY Rates for Mesothelioma by SDI Level Among Female and Male Patients

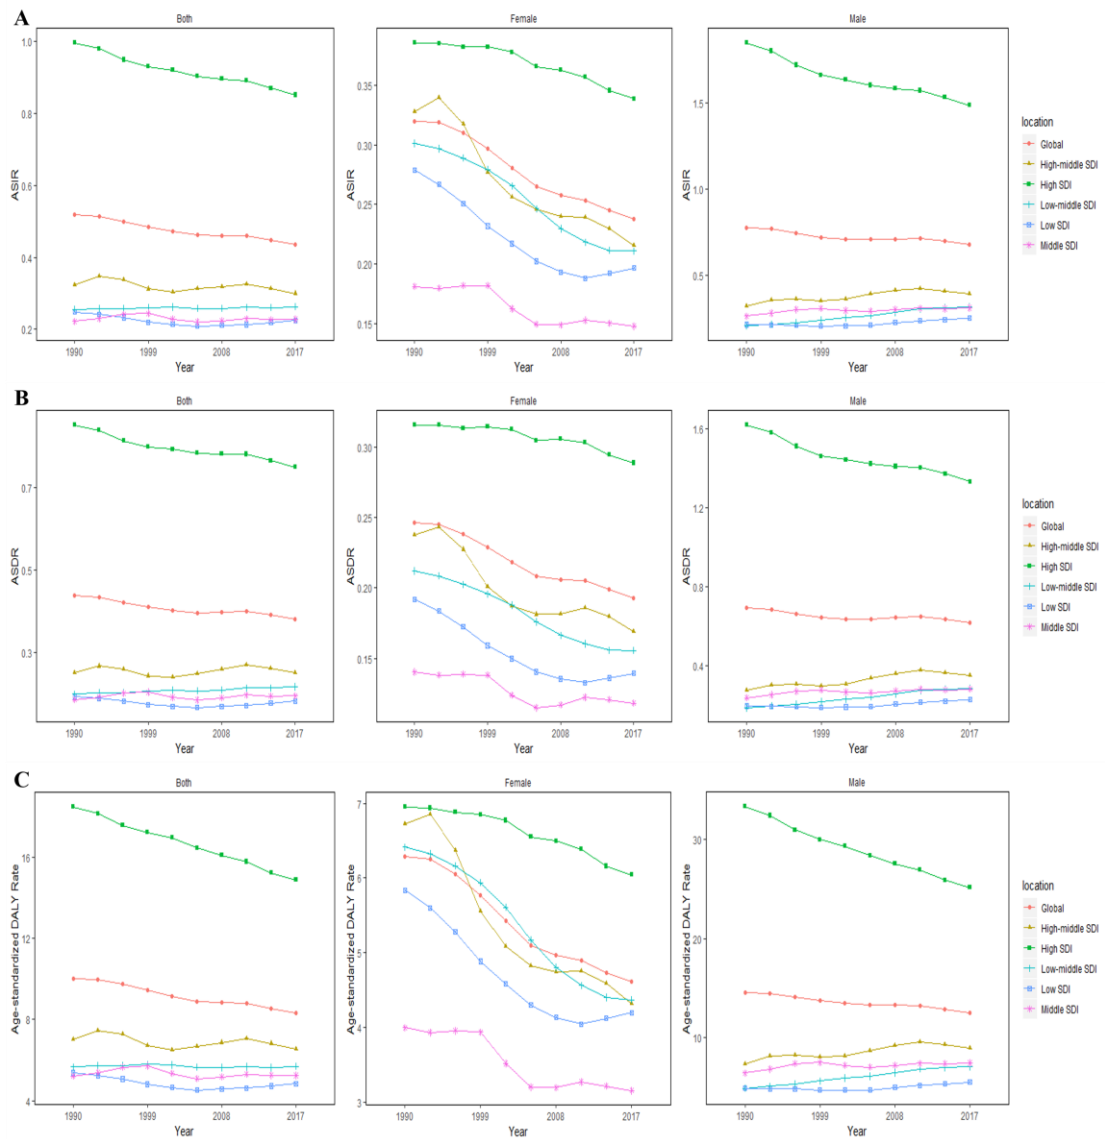

**eFigure 17.** Joinpoint Regression Analysis of Age-Standardized Incidence Rates (ASIRs) Among Female Patients in SDI Regions From 1990 to 2017

APC: annual percent change.

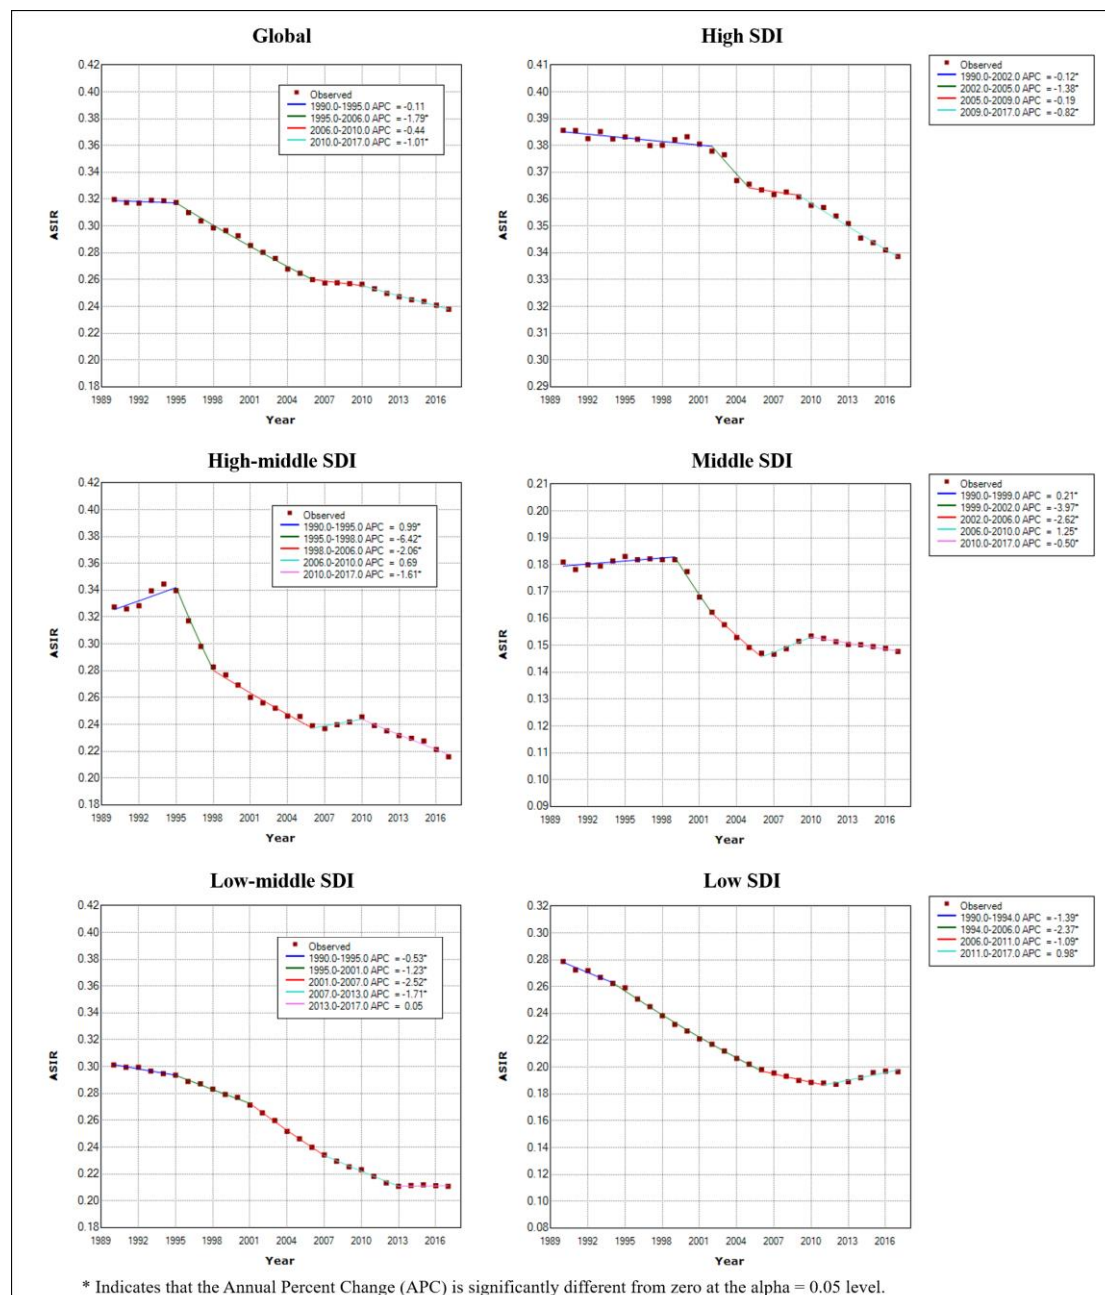

**eFigure 18.** Joinpoint Regression Analysis of Age-Standardized Incidence Rates (ASIRs) Among Male Patients in SDI Regions From 1990 to 2017

APC: annual percent change.

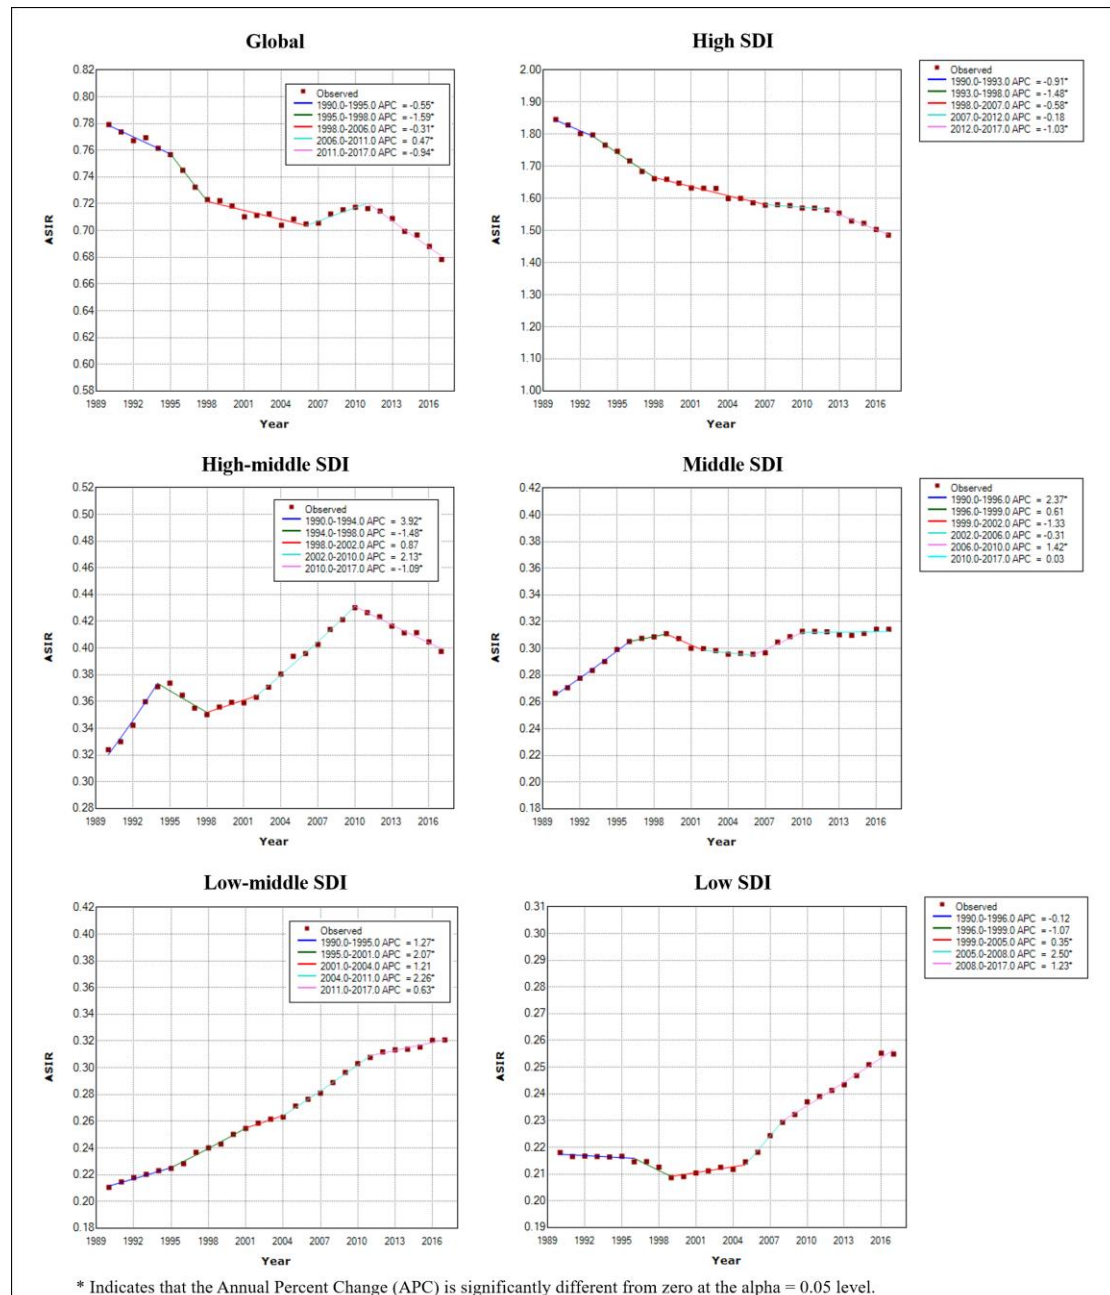

**eFigure 19.** Joinpoint Regression Analysis of Age-Standardized Incidence Rates (ASIRs) in SDI Regions From 1990 to 2017

APC: annual percent change.

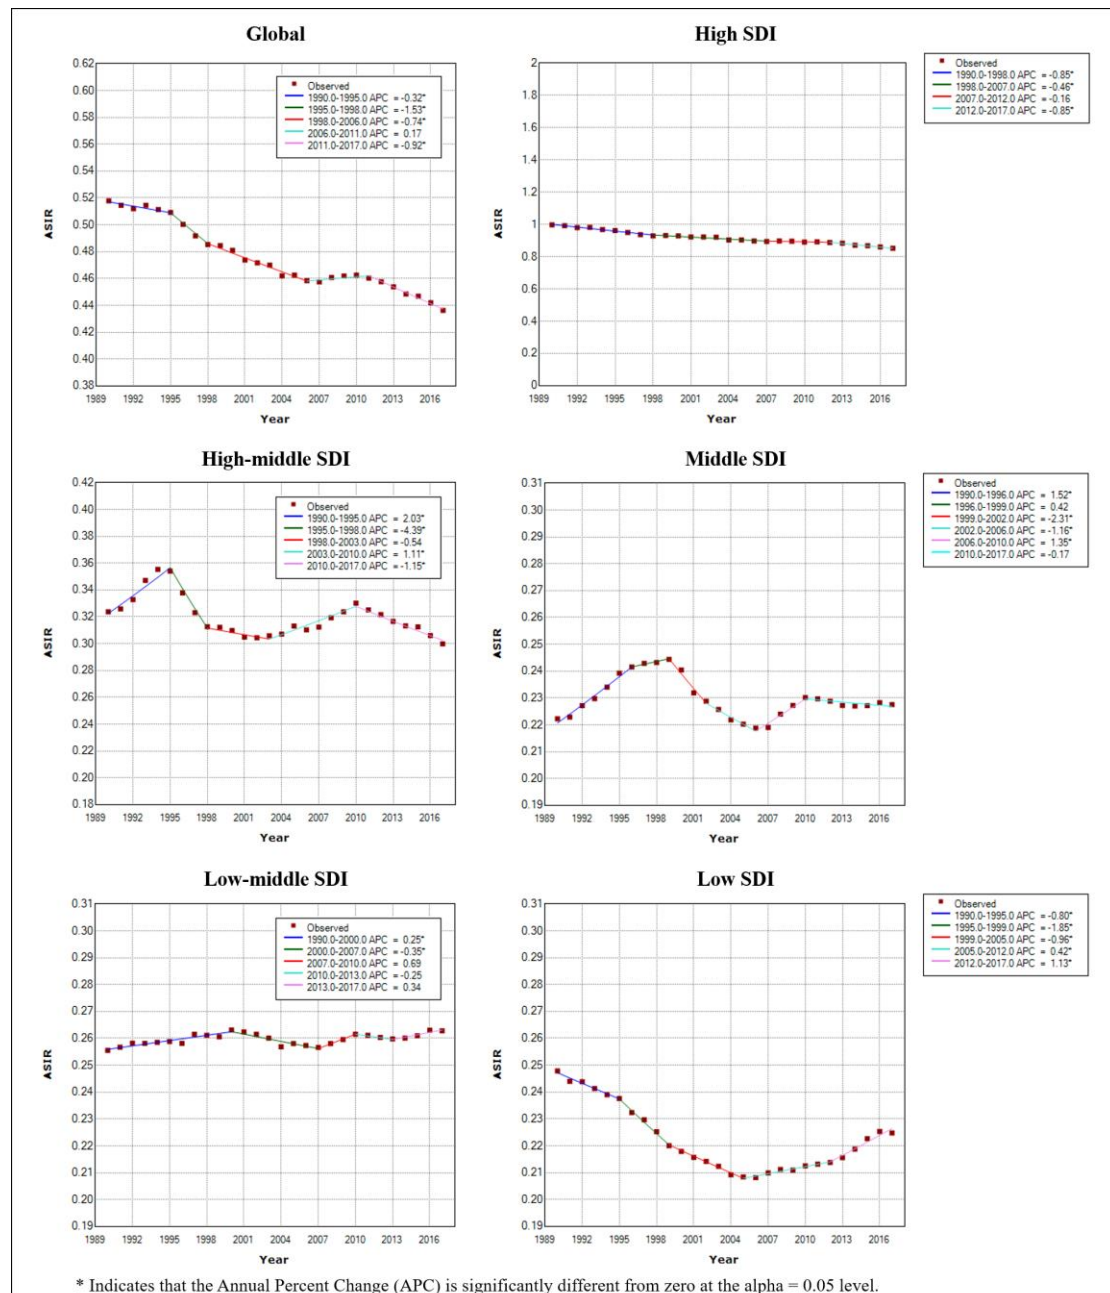

**eFigure 20.** Joinpoint Regression Analysis of Age-Standardized Death Rates (ASDRs) in SDI Regions From 1990 to 2017

APC: annual percent change.

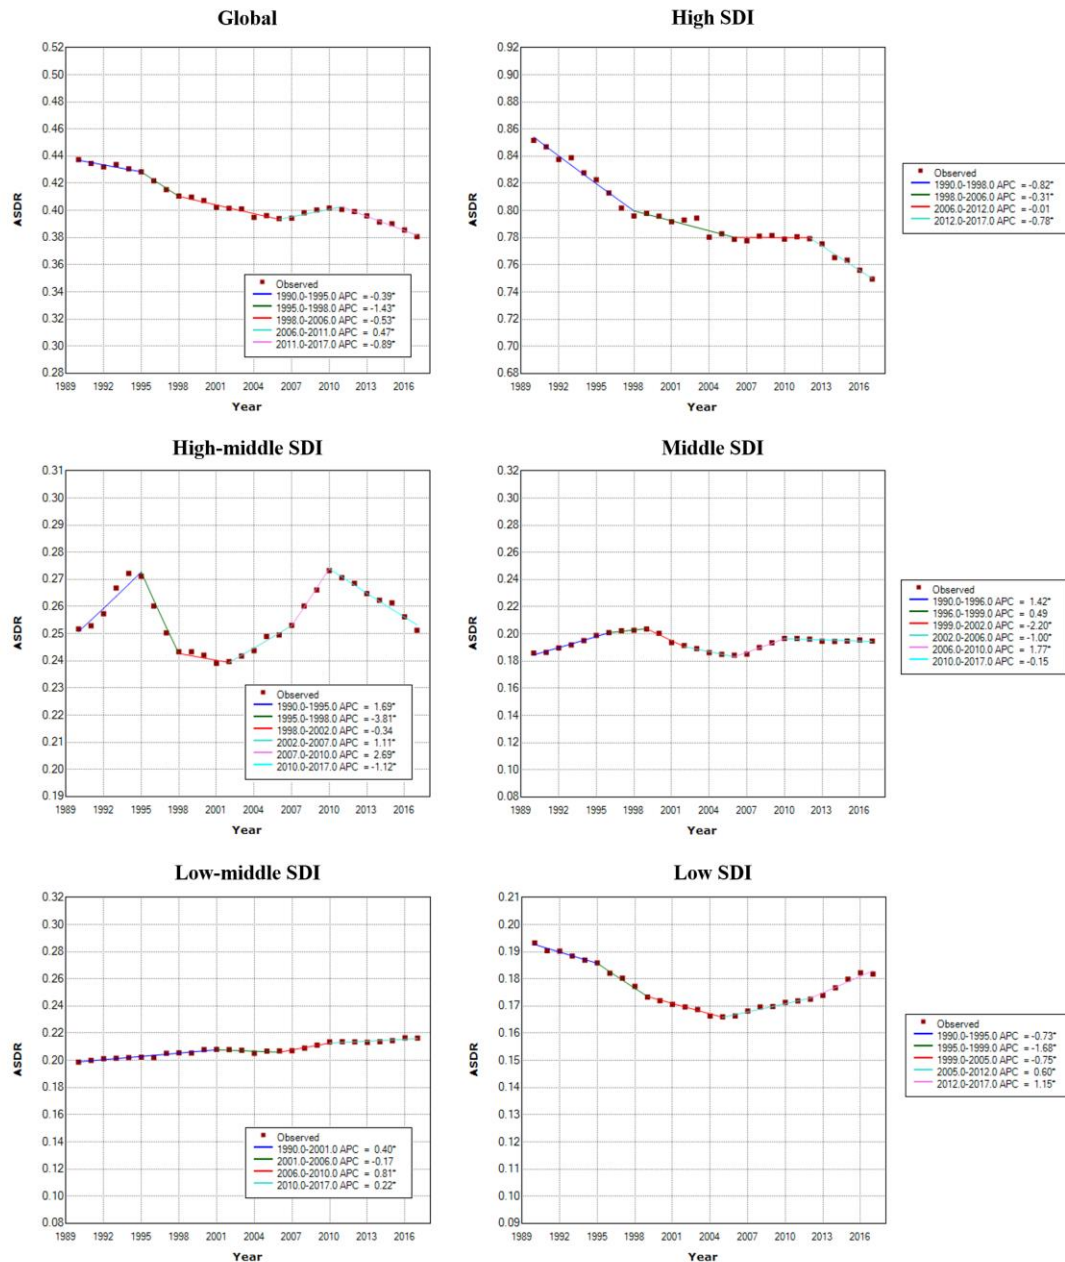

\* Indicates that the Annual Percent Change (APC) is significantly different from zero at the alpha = 0.05 level.



**eFigure 21.** Epidemiological Patterns of Mesothelioma Deaths in 195 Countries and Territories

(A) ASDR of mesothelioma in 2017; (B) All ages percent change in death cases between 1990 and 2017; (C) The EAPC of ASDR from 1990 to 2017. Countries with an extreme value of cases' number or change were annotated. ASDR, age-standardized death rate; EAPC, estimated annual percentage change.

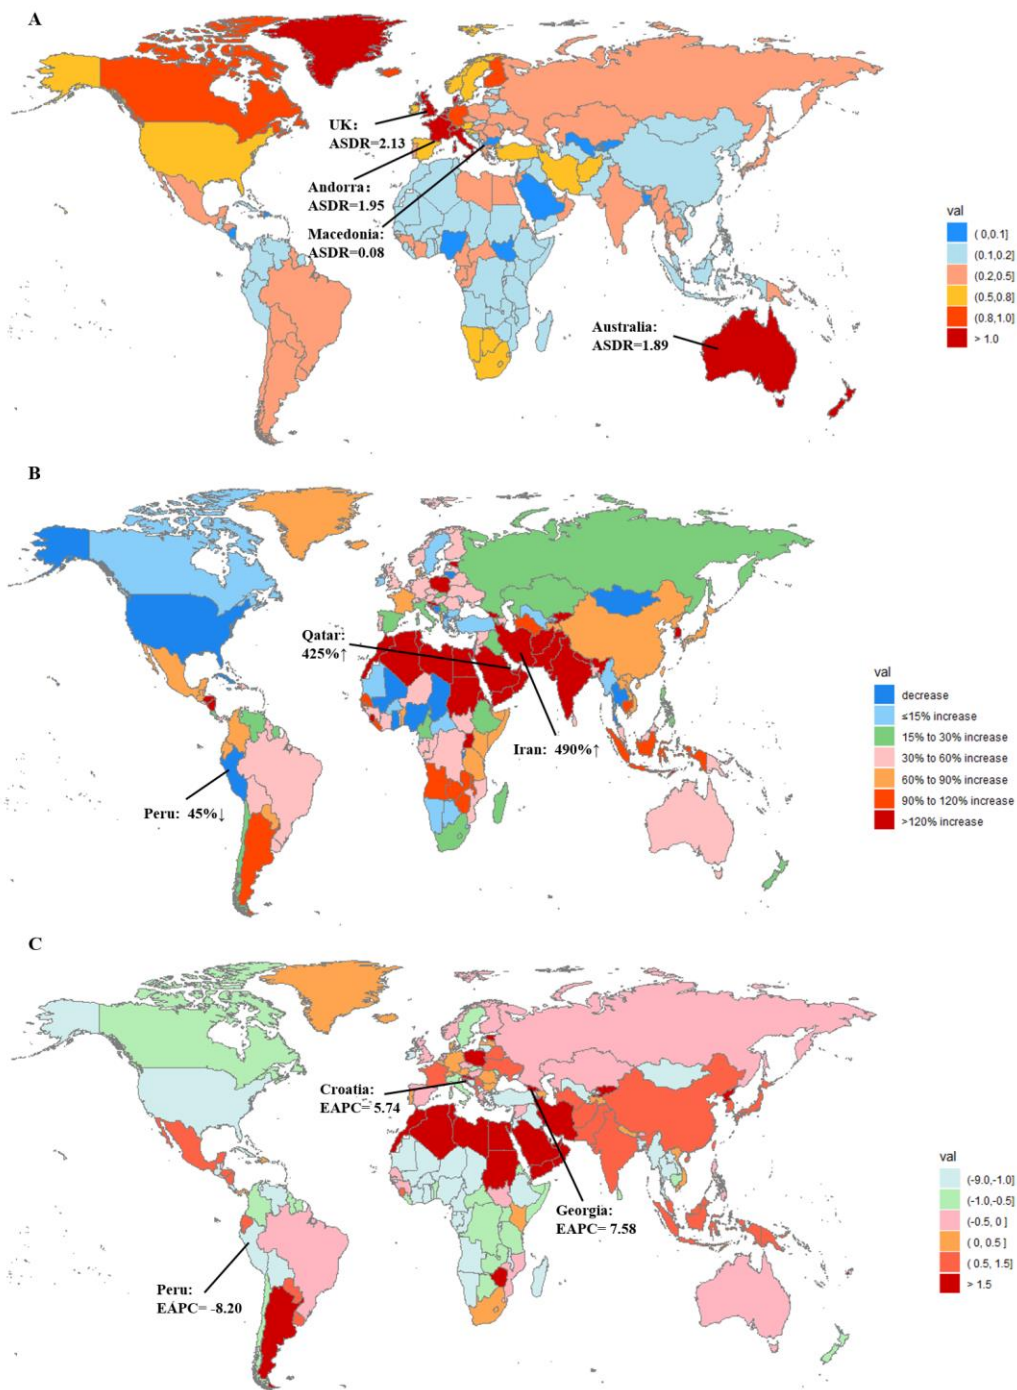

**eFigure 22.** Epidemiological Patterns of Mesothelioma DALYs in 195 Countries and Territories

(A) ASR of DALY in 2017; (B) All ages percent change in DALY cases between 1990 and 2017; (C) The EAPC of ASR from 1990 to 2017. Countries with an extreme value of cases' number or change were annotated. DALY, disability adjusted life-year; EAPC, estimated annual percentage change.

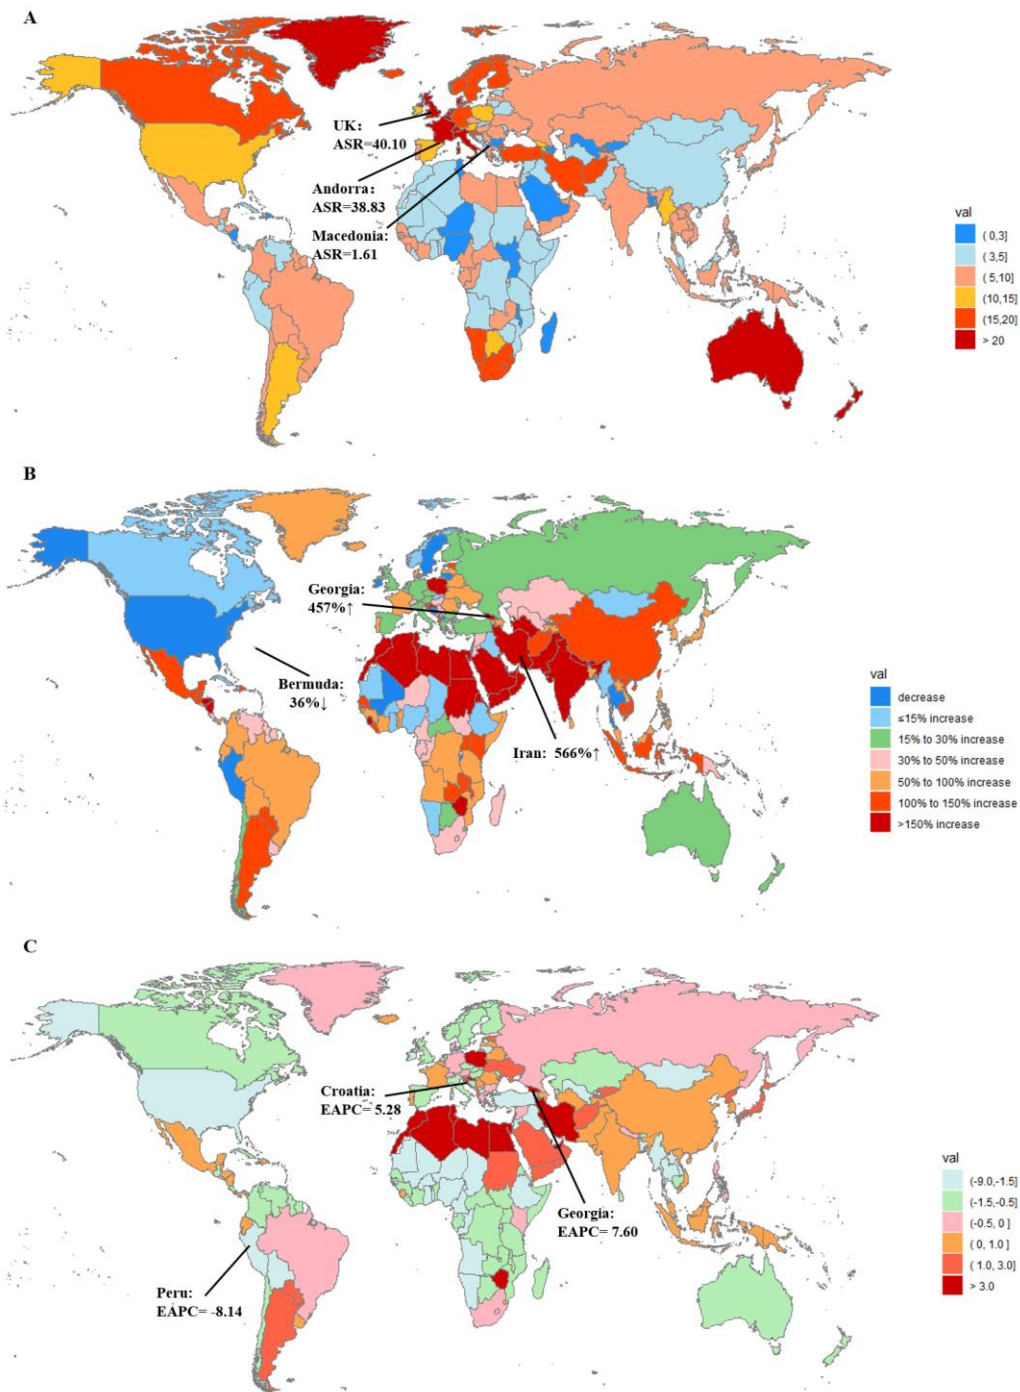

**eFigure 23.** Epidemiological Patterns Among Male Patients in 195 Countries and Territories

(A) ASIR of the male in 2017; (B) ASDR of the male in 2017; (C) The EAPC of ASIR from 1990 to 2017. Countries with an extreme value of ASR or change were annotated. ASR, age-standardized rate; ASIR, age-standardized incidence rate; ASDR, age-standardized death rate; EAPC, estimated annual percentage change.

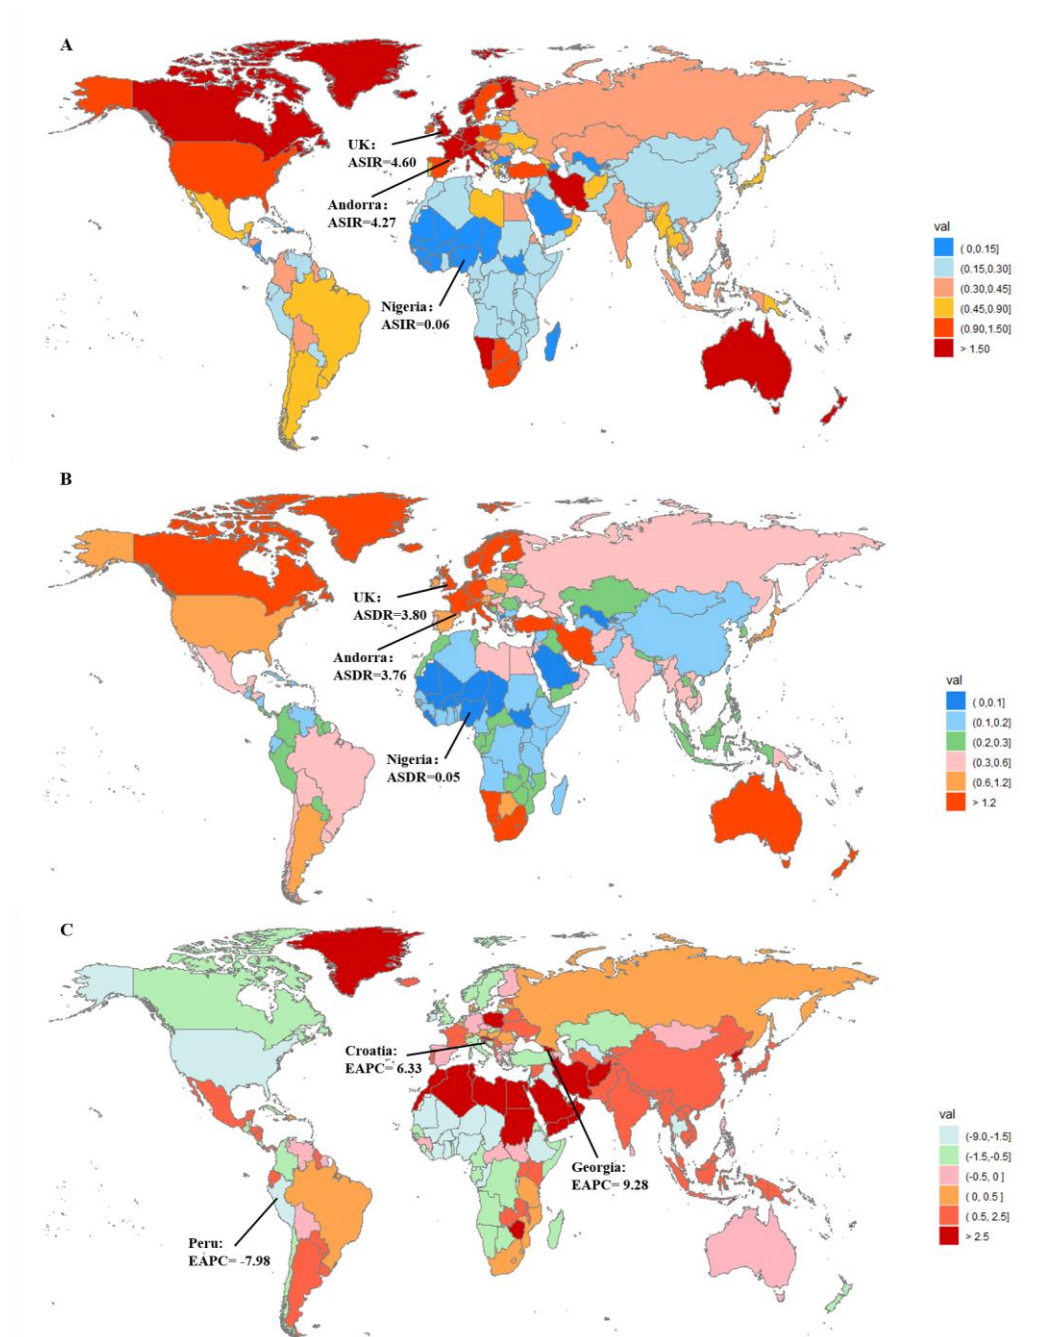

**eFigure 24.** Epidemiological Patterns Among Female Patients in 195 Countries and Territories

(A) ASIR of the female in 2017; (B) ASDR of the female in 2017; (C) The EAPC of ASIR from 1990 to 2017. Countries with an extreme value of ASR or change were annotated. ASR, age-standardized rate; ASIR, age-standardized incidence rate; ASDR, age-standardized death rate; EAPC, estimated annual percentage change.

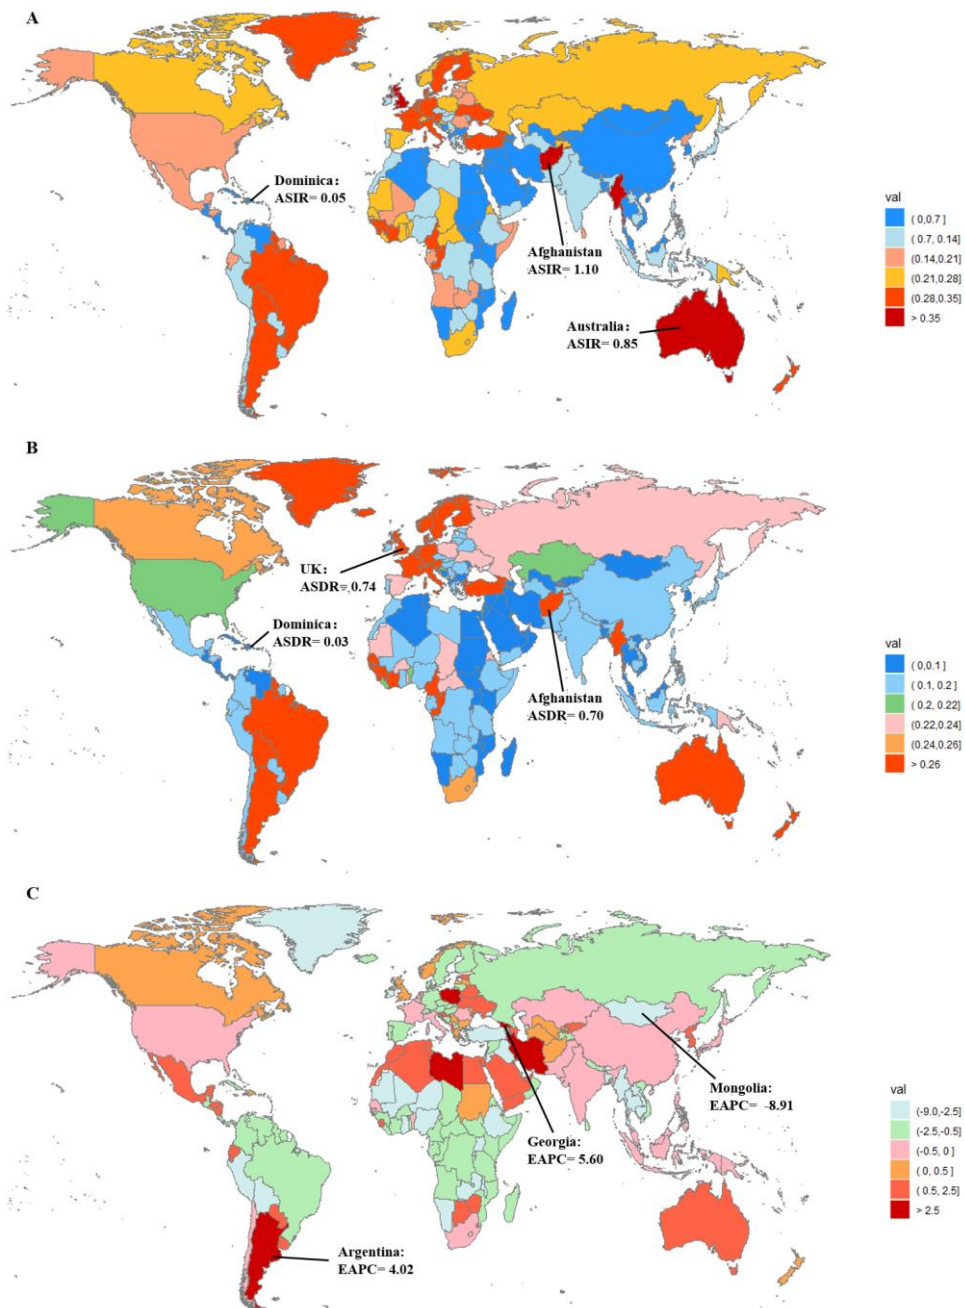

## eReferences

1. Liu Z, Jiang Y, Yuan H, Fang Q, Cai N, Suo C, et al. The trends in incidence of primary liver cancer caused by specific etiologies: Results from the Global Burden of Disease Study 2016 and implications for liver cancer prevention. *Journal of hepatology*. 2019;70(4):674-83.
2. Roth GA, Abate D, Abate KH, Abay SM, Abbafati C, Abbasi N, et al. Global, regional, and national age-sex-specific mortality for 282 causes of death in 195 countries and territories, 1980–2017: a systematic analysis for the Global Burden of Disease Study 2017. *The Lancet*. 2018;392(10159):1736-88.
3. James SL, Abate D, Abate KH, Abay SM, Abbafati C, Abbasi N, et al. Global, regional, and national incidence, prevalence, and years lived with disability for 354 diseases and injuries for 195 countries and territories, 1990–2017: a systematic analysis for the Global Burden of Disease Study 2017. *The Lancet*. 2018;392(10159):1789-858.
4. Kim HJ, Fay MP, Feuer EJ, Midthune DN. Permutation tests for joinpoint regression with applications to cancer rates. *Statistics in medicine*. 2000;19(3):335-51.
5. Network. GBoDC. Global Burden of Disease Study 2017 (GBD 2017) Socio-Demographic Index (SDI) 1950–2017. 2018 ed2018.
